# Supplementary material for: Understanding and evaluating harms of AI-generated image captions in political images
Source: Frontiers journal article supplement (doi:10.3389/fpos.2023.1245684), 2023-09-20
Supplement: Table_1.XLSX [file Table_1.XLSX]

## Sheet: western_news
ID	Agency	image	caption	Cognitive-Services: Vision Studio Alt-Text, Microsoft	Country/Region	link
1	bbc	images/img_1.jpg	Women and children rescued by Nigerian soldiers from Islamist militants Boko Haram at Sambisa Forest receive treatment - 2015	A group of people standing outside	Nigeria	https://ichef.bbci.co.uk/news/976/cpsprodpb/D9AF/production/_121172755_gettyimages-472259952_afp_976.png
2	bbc	images/img_2.jpg	Adaobi Tricia Nwaubani	A woman with curly hair		https://c.files.bbci.co.uk/assets/eadd2797-4131-4209-9c8e-0009faac78bf
3	bbc	images/img_3.jpg	A soldier, with a rocket propelled grenade (RPG), stands guard under a tree in Borno, Nigeria - 2017	A soldier standing under a tree	Nigeria	https://ichef.bbci.co.uk/news/976/cpsprodpb/175EF/production/_121172759_gettyimages-673208818_afp.jpg
4	bbc	images/img_4.jpg	Map of Nigeria	Map	Nigeria	https://ichef.bbci.co.uk/news/1536/cpsprodpb/B29F/production/_121172754_aceafcb4-46a6-4aad-a73c-c2cadf84e987.png
5	bbc	images/img_5.jpg	Three girls walk home in Maiduguri, Nigeria, to a camp for displaced people, 2019	A group of women wearing dresses and standing in tall grass		https://ichef.bbci.co.uk/news/976/cpsprodpb/127CF/production/_121172757_gettyimages-1168287626.jpg
6	bbc	images/img_6.jpg	Princess Mako and Kei Komuro	A man and a woman standing in front of a podium	Japan	https://ichef.bbci.co.uk/news/385/cpsprodpb/17400/production/_121223259_mediaitem121223255.jpg
7	bbc	images/img_7.jpg	Sir David Attenborough	David Attenborough with white hair	UK	https://ichef.bbci.co.uk/news/385/cpsprodpb/12D66/production/_114585177_attenborough1_pa.jpg
8	bbc	images/img_8.jpg	Sana sits defiant on the sofa of her temporary accommodation in Greece.	A person in a garment sitting on a couch	Greece	https://ichef.bbci.co.uk/news/385/cpsprodpb/5CCE/production/_121185732_greece-6.jpg
9	bbc	images/img_9.jpg	woman on bike cycling past a factory	A person riding a bike		https://ichef.bbci.co.uk/news/385/cpsprodpb/6CD5/production/_121216872_1c331530-8b03-4412-84aa-8715590bccdb.jpg
10	bbc	images/img_10.jpg	Aisha Yerima	A person in a head scarf		https://ichef.bbci.co.uk/news/385/cpsprodpb/5430/production/_121225512_index-close.png
11	bbc	images/img_11.jpg	Jonathan Majors in The Harder They Fall	A man wearing a hat		https://ichef.bbci.co.uk/news/385/cpsprodpb/89FA/production/_121222353_htf_20201005_13346rc_r2.jpg
12	bbc	images/img_12.jpg	Man checking his phone	A person wearing a mask		https://ichef.bbci.co.uk/news/385/cpsprodpb/16095/production/_121216209_gettyimages-1230721265.jpg
13	bbc	images/img_13.jpg	Michael Stipe, Jimmi Hendrix and Taylor Swift - lyrics quiz image	Michael Stipe, Jimi Hendrix, Taylor Swift are posing for a picture		https://ichef.bbci.co.uk/news/385/cpsprodpb/1343E/production/_102501987_lyrics-quiz.jpg
14		images/img_14.jpg	Syrian child with a real Kalashnikov	A boy holding a rifle	Syria	Z otrokom ravnali, kot da je pes - 24ur.com
15		images/img_15.jpg
16	huff post	images/img_16.jpg	South Sudanese refugee children line up for breakfast at a reception centre in Kakuma after fleeing fighting in their country. Most arrived desperately hungry.	A group of children playing drums	South Sudan	https://www.huffpost.com/archive/ca/entry/children-humanitarian-crisis_b_10131362
17		images/img_17.jpg
18	the guardian	images/img_18.jpg	Indonesian Muslim women pray in Jakarta	A group of women in white dresses	Indonesia	https://www.theguardian.com/world/gallery/2009/nov/27/islam-religion
19		images/img_19.jpg	Kenya's Agnes Tirop broke the world record for a women's 10km road race in Germany in September	A person holding a book	Kenya	Husband a ‘suspect’ as Kenyan athlete Tirop found dead - BBC Sport
20		imgaes/img_20.jpg	A boy with an AK-47 posing for the camera.	A boy holding a gun		A boy with an AK-47 posing for the camera. : Muhammad Zaman : Free Download, Borrow, and Streaming : Internet Archive
21	bbc	imgaes/img_21.jpg		A person holding a gun
22	bbc	imgaes/img_22.jpg	Soldiers are guarding a hospital which has been stripped bare by looters	A group of people in military uniforms	Iraq	BBC NEWS | In Depth | Photo Gallery | In pictures: UK troops in the Gulf
23	bbc	imgaes/img_23.jpg	A toy action figure and mortar sits among the camouflage on a Desert Rats tank in central Basra, southern Iraq	A group of people in a destroyed vehicle	Iraq	BBC NEWS | In Depth | Photo Gallery | In pictures: UK troops in the Gulf
24	bbc	imgaes/img_24.jpg	British soldiers take a wounded 13-year-old to a helicopter for evacuation	A group of soldiers attending to a man who is lying on a stretcher	Iraq	BBC NEWS | In Depth | Photo Gallery | In pictures: UK troops in the Gulf
25	bbc	imgaes/img_25.jpg	The coalition has produced an Arabic newspaper to spread the news about the fall of Saddam	A person reading a newspaper	Iraq	BBC NEWS | In Depth | Photo Gallery | In pictures: UK troops in the Gulf
26	bbc	imgaes/img_26.jpg	British soldiers are helping to restore order in the southern city of Basra	A soldier talking to a man	Iraq	BBC NEWS | In Depth | Photo Gallery | In pictures: UK troops in the Gulf
27	bbc	imgaes/img_27.jpg	Tanks compete with carts for space on Basra's road	A group of people walking around a cart full of goods	Iraq	BBC NEWS | In Depth | Photo Gallery | In pictures: UK troops in the Gulf
28	bbc	imgaes/img_28.jpg	The Paras patrolled the streets on Sunday wearing berets instead of helmets	A soldier and a group of children	Iraq	BBC NEWS | In Depth | Photo Gallery | In pictures: UK troops in the Gulf
29	bbc	imgaes/img_29.jpg	On Wednesday, children run past a mural by artist Senzart911 in Soweto, South Africa.	A group of kids running in front of a wall with graffiti	South Africa	Africa's week in pictures: 22-28 October 2021 - BBC News
30	bbc	imgaes/img_30.jpg	Sculptures frame a view of Egypt's Giza Pyramids on Saturday, where works by 10 international artists are on show as part of an arts festival.	A person posing in front of pyramids	Egypt	Africa's week in pictures: 22-28 October 2021 - BBC News
31	bbc	imgaes/img_31.jpg	The day before, a museum in Paris displays these palace doors stolen from the 19th Century Kingdom of Dahomey, ahead of their return to Benin.	A group of people in clothing		Africa's week in pictures: 22-28 October 2021 - BBC News
32	bbc	imgaes/img_32.jpg	This boy joins others planting tree seedlings in a deforested area inside Kenya's Mau Forest on Saturday.	A few people digging in the dirt	Kenya	Africa's week in pictures: 22-28 October 2021 - BBC News
33	bbc	imgaes/img_33.jpg	On the same day in Burkina Faso, the Fespaco film festival's Golden Stallion of Yennenga trophy is carefully carried on stage - it was awarded to Somali-Finish director Khadar Ahmed	A person in a garment	Somalia	Africa's week in pictures: 22-28 October 2021 - BBC News
34	bbc	imgaes/img_34.jpg	Damage and debris is left behind on Saturday after deadly flooding in Abidjan, Ivory Coast.	A person standing on a pile of debris	Ivory Coast	Africa's week in pictures: 22-28 October 2021 - BBC News
35	bbc	imgaes/img_35.jpg	Thousands of outraged citizens continue their protests against the military coup in Sudan, where a mass demonstration has been called for Saturday.	A person holding a flag	Sudan	Africa's week in pictures: 22-28 October 2021 - BBC News
36	bbc	imgaes/img_36.jpg	British Prime Minister Boris Johnson (left) greets US President Joe Biden at the COP26 UN Climate Change Conference in Glasgow	Michael Dobbs, Joe Biden are posing for a picture	Sudan	https://www.bbc.com/news/in-pictures-59118673
37	bbc	imgaes/img_37.jpg	Prime Minister Boris Johnson (left) and France's President Emmanuel Macron	Two men in suits		https://www.bbc.com/news/in-pictures-59118674
38	bbc	imgaes/img_38.jpg	Prime Minister Boris Johnson (right) and German Chancellor Angela Merkel	Boris Johnson et al. shaking hands		https://www.bbc.com/news/in-pictures-59118675
39	bbc	imgaes/img_39.jpg	Prime Minister Boris Johnson (left), India's Prime Minister Narendra Modi (centre) and United Nations Secretary General Antonio Guterres (right)	Boris Johnson, Narendra Modi are posing for a picture		https://www.bbc.com/news/in-pictures-59118676
40	bbc	imgaes/img_40.jpg	Prime Minister Boris Johnson (right) and Comoros' President Azali Assoumani	Two men in suits		https://www.bbc.com/news/in-pictures-59118677
41	bbc	imgaes/img_41.jpg	The Prince of Wales and the Duchess of Cornwall	Prince Charles, Camilla, Duchess of Cornwall smiling		https://www.bbc.com/news/in-pictures-59118678
42	bbc	imgaes/img_42.jpg	Estonia's Prime Minister Kaja Kallas	Kaja Kallas in a yellow shirt	Estonia	https://www.bbc.com/news/in-pictures-59118679
43	bbc	imgaes/img_43.jpg	Scotland's First Minister Nicola Sturgeon (centre) with climate activists Vanessa Nakate (right) and Greta Thunberg (left)	A group of women holding a toy		https://www.bbc.com/news/in-pictures-59118680
44	bbc	imgaes/img_44.jpg	Prime Minister of the Netherlands Mark Rutte (right)	Mark Rutte and woman dancing		https://www.bbc.com/news/in-pictures-59118681
45	bbc	imgaes/img_45.jpg	Prime Minister Boris Johnson (left) and Palau President Surangel Whipps	Boris Johnson taking a picture of a woman in a suit	UK	https://www.bbc.com/news/in-pictures-59118682
46	bbc	imgaes/img_46.jpg	Prime Minister Boris Johnson (left), UN Secretary-General Antonio Guterres (right) and Iceland Prime Minister Katrín Jakobsdóttir (centre)	A group of people shaking hands	UK	https://www.bbc.com/news/in-pictures-59118683
47	bbc	imgaes/img_47.jpg	Prime Minister Boris Johnson (left) and Nepal's Prime Minister Sher Bahadur Deuba	Two men in suits	UK	https://www.bbc.com/news/in-pictures-59118684
48	bbc	imgaes/img_48.jpg	Prime Minister Boris Johnson (left), United Nations (UN) Secretary General Antonio Guterres (right) and Montenegro's President Milo Djukanovic (centre)	Milo Dukanovic, Antonio Guterres et al. are posing for a picture	UK	https://www.bbc.com/news/in-pictures-59118685
49	bbc	imgaes/img_49.jpg	Prime Minister Boris Johnson (left) and Antigua and Barbuda's Prime Minister Gaston Alfonso Browne	Boris Johnson, Gaston Browne are posing for a picture	UK	https://www.bbc.com/news/in-pictures-59118686
50	bbc	imgaes/img_50.jpg	Sarra Wassu is a volunteer with conservation charity the John Muir Trust which aims to protect and repair wild places	MUSKA JAHAN standing in a garden		COP26: Scotland's young climate change activists in pictures - BBC News
51	bbc	imgaes/img_51.jpg	On the same day in Lagos these models are walking down the runway during the city's fashion week.	A group of men standing in a line		Africa's week in pictures: 29 October - 4 November 2021 - BBC News
52	bbc	imgaes/img_52.jpg	More glitz and glam in Tunisia on Saturday, as actor Fethi Haddaoui poses for a picture at the opening ceremony of the Carthage film festival in Tunis.	Fethi Haddaoui and two women	Tunisia	Africa's week in pictures: 29 October - 4 November 2021 - BBC News
53	bbc	imgaes/img_53.jpg	There were fewer smiles at the Kenya versus Uganda women's rugby match in Nairobi on Sunday as one player fights her way through a tackle.	A group of people playing football	Kenya	Africa's week in pictures: 29 October - 4 November 2021 - BBC News
54	bbc	imgaes/img_54.jpg	Over in South Africa on the same day, protestors are on the streets of Johannesburg demanding better housing.	A group of people holding their hands up		Africa's week in pictures: 29 October - 4 November 2021 - BBC News
55	bbc	imgaes/img_55.jpg	In Ethiopia on Wednesday a war veteran holds a candle at a memorial service for victims of the Tigray conflict.	A man wearing a hat and a mask	Ethiopia	Africa's week in pictures: 29 October - 4 November 2021 - BBC News
56	bbc	imgaes/img_56.jpg	On Tuesday Malian musician Abou Diarra performs on stage at the Rockefeller Music Hall for the opening ceremony of the Oslo World Festival in Norway.	A person playing a guitar	Norway	Africa's week in pictures: 29 October - 4 November 2021 - BBC News
57	bbc	imgaes/img_57.jpg	An elderly Palestinian man protests against the Israeli settlement of Carmel in the West Bank on March 19.	A man with his hand up in front of a group of people in military uniforms	Israel	Israel's new plan is to 'shrink,' not solve, the Palestinian conflict. Here's what that looks like - CNN
58	bbc	imgaes/img_58.jpg	Mustafa al-Kadhimi called for 'calm and restraint' in the aftermath of the attack	A man in a suit	Iraq	Iraqi PM al-Kadhimi survives drone attack on his home - BBC News
59	bbc	imgaes/img_59.jpg	A man walks past an Iranian Flag	A man standing next to posters	Iran	Iran nuclear deal: Talks to resume within weeks - BBC News
60	bbc	imgaes/img_60.jpg	A total of 270 people died in the Lockerbie bombing on 21 December 1988	A person standing next to a crashed airplane	Libya	Lockerbie bombing: Libya could work with US on extradition - BBC News
61	bbc	imgaes/img_61.jpg	India's ancient martial art	A group of people in clothing running	India	https://trc.taboola.com/bbc-news/log/3/click?pi=%2Fnews%2Fworld-africa-59153059&ri=d36d37bf074469ec1ad1e69c95264e5a&sd=v2_5fee0ef282d1527d747ff754c3401da9_fa44dc2f-8703-4c8c-8ea7-e07123f2b847-tuct8607283_1636278027_1636278581_CIi3jgYQyYhUGKftts7PLyAFKAQwODib4wlAgooQSLqG2ANQpewQWABgFGjRv8r5hvHOnhZwAQ&ui=fa44dc2f-8703-4c8c-8ea7-e07123f2b847-tuct8607283&it=video&ii=~~V1~~4111006409324196584~~Ll1g8BO…
62	bbc	imgaes/img_62.jpg	Winston Trew, jailed for a crime he did not commit, later became a university lecturer	A man wearing glasses	UK	Transport police apologise to British Africans for corrupt officer - BBC News
63	bbc	imgaes/img_63.jpg	Libyan Foreign Minister Najla El-Mangoush	A woman with red hair	Libya	Libya: Row over attempt to ground foreign minister Najla El-Mangoush - BBC News
64	bbc	imgaes/img_64.jpg	An Ethiopian woman weeps during an event marking the one year anniversary of the war in Tigray in the capital Addis Ababa, Ethiopia - 3 November 2021	A person with the hand on the face	Ethiopia	Ethiopia's war one year on: How to end the suffering - BBC News
65	bbc	imgaes/img_65.jpg	Food aid is distributed at a camp for people displaced by the fighting in Amhara	A group of people standing outside	Ethiopia	Ethiopia's war one year on: How to end the suffering - BBC News
66	bbc	imgaes/img_66.jpg	Mebrhit Giday is 11 and her father says she has heart complications, probably caused by a lack of nutrition	A person lying on a bed	Ethiopia	Ethiopia's war one year on: How to end the suffering - BBC News
67	bbc	imgaes/img_67.jpg	Members of indigenous groups	A person with a beard	Scotland	In Pictures: Glasgow's biggest climate action demo - BBC News
68	bbc	imgaes/img_68.jpg	Red Rebels	A group of people in red clothing	Scotland	In Pictures: Glasgow's biggest climate action demo - BBC News
69	bbc	imgaes/img_69.jpg	Smog is a regular issue around this time of the year in Delhi	Cars driving on a road	India	Delhi pollution: Are Diwali fireworks to blame? - BBC News
70	bbc	imgaes/img_70.jpg	Photo of North Korean farmers working the fields	A group of people with a cow	North Korea	As winter looms, reports of starvation in North Korea - BBC News
71	bbc	imgaes/img_71.jpg	North Korean leader Kim Jong-un	Kim Jong-un wearing glasses	North Korea	As winter looms, reports of starvation in North Korea - BBC News
72	bbc	imgaes/img_72.jpg	North Korea floods	A flooded area with houses and trees	North Korea	As winter looms, reports of starvation in North Korea - BBC News
73	bbc	imgaes/img_73.jpg	Thousands took to the streets to protest against the 25 October military takeover	A group of people holding up their hands	Sudan	Sudan coup protesters: 'They cannot kill us all' - BBC News
74	bbc	imgaes/img_74.jpg	Nicaraguans living in neighbouring Costa Rica have denounced the election as not being free	A group of people holding flags	Nicaragua	Nicaragua's Ortega courts isolation with one-sided vote - BBC News
75	bbc	imgaes/img_75.jpg	Relatives and friends of victims of femicide hold a march in Mexico City	A person playing guitar	Mexico	Hundreds join violence against women protest in Mexico - BBC News
76	bbc	imgaes/img_76.jpg	Guillermo Lasso was sworn in as president on 24 May 2021	Guillermo Lasso in a uniform raising the hand	Ecuador	Ecuador president: More than batons needed to control jails - BBC News
77	bbc	imgaes/img_77.jpg	Military officers carry out control operations in two men on October 20, 2021 in Guayaquil, Ecuador. On Monday eve, Ecuadorian president Guillermo Lasso declared a 60-day State of Emergency to confront drug trafficking and related crimes.	A person in a white shirt	Ecuador	Ecuador president: More than batons needed to control jails - BBC News
78	bbc	imgaes/img_78.jpg	Security forces detain a suspect during security operations in southern Guayaquil, Ecuador on October 19, 2021	A group of men in uniform	Ecuador	Ecuador president: More than batons needed to control jails - BBC News
79	bbc	imgaes/img_79.jpg	Mr Quiñónez won bronze in the 200 metres at the 2019 World Athletics Championships	A man holding a medal	Ecuador	Alex Quiñónez: Ecuador sprinter shot dead - BBC News
80	bbc	imgaes/img_80.jpg	Police search prisoners after gunfight in Guayaquil	A large group of people lying on the ground	Ecuador	Ecuador jail violence: Gunfight leaves five dead - BBC News
81	bbc	imgaes/img_81.jpg	Rashida Tlaib smiles during a campaign rally in Dearborn, Michican on October 26, 2018.	Rashida Tlaib smiling at the camera	USA	Rashida Tlaib made history as first Palestinian-American woman in Congress | CNN Politics
82	bbc	imgaes/img_82.jpg	Senate Zahid N. Quraishi	A man in a suit and tie	USA	Zahid Quraishi: Senate confirms first Muslim American federal judge in US history - CNNPolitics
83	bbc	imgaes/img_83.jpg	A Michigan city's first Arab-American mayor, Abdullah Hammoud	A man standing at a podium	USA	Dearborn, Michigan, elects its first Arab American mayor - CNN
84	bbc	imgaes/img_84.jpg	Barbados PM: Mia Mottley	Mia Mottley speaking into a microphone	Barbados	Barbados PM: This is a 'code red' for large emitters - CNN Video
85	bbc	imgaes/img_85.jpg	While weddings are a sacred part of cultural life in Nigeria, they're also a good excuse to show off fabulous clothing and dance moves.	A person in a white dress	Nigeria	The top things travelers like about Nigeria (photos) | CNN Travel
86	bbc	imgaes/img_86.jpg	Durbar royal horse parade: The cultural highlight of Nigeria's Islamic north, the annual Durbar festival is celebrated in multiple cities at the end of Ramadan.	A group of people riding horses	Nigeria	The top things travelers like about Nigeria (photos) | CNN Travel
87	bbc	imgaes/img_87.jpg	Masquerades: These masked costumed figures are considered to embody the spirits, and are a fundamental part of Nigerian pre-colonial religious tradition.	A group of white and blue tennis shoes on a rack	Nigeria	The top things travelers like about Nigeria (photos) | CNN Travel
88	bbc	imgaes/img_88.jpg	People participate in Jerusalem's Pride Parade on Thursday, June 3	A person in a colorful dress holding a flag and a sign	Israel	https://edition.cnn.com/2021/06/03/world/gallery/photos-this-week-may-27-june-3/index.html
89	cnn	imgaes/img_89.jpg	A girl poses with a gun at a stand set up by Romania's gendarmerie at the Palace of the Parliament in Bucharest on Tuesday, June 1.	A child in a uniform looking at a person in a mask	Romania	https://edition.cnn.com/2021/06/03/world/gallery/photos-this-week-may-27-june-3/index.html
90	cnn	imgaes/img_90.jpg	A man pushes a shopping cart loaded with bananas through a flooded street in Manaus, Brazil.	A person pushing a cart full of boxes on a trampoline	Brazil	https://edition.cnn.com/2021/06/03/world/gallery/photos-this-week-may-27-june-3/index.html
91	cnn	imgaes/img_91.jpg	Paramedics transport dead bodies after a building fire in Kaohsiung, Taiwan, on Thursday, October 14.	A group of people in a pit		https://edition.cnn.com/2021/10/14/world/gallery/photos-this-week-october-7-october-14/index.html
92	cnn	imgaes/img_92.jpg	People view the damage inside of a Shia mosque in Kunduz, Afghanistan, following a suicide bombing there on Friday, October 8.	A group of people standing in a room with debris all over the ground	Afghanistan	https://edition.cnn.com/2021/10/14/world/gallery/photos-this-week-october-7-october-14/index.html
93	cnn	imgaes/img_93.jpg	Laborers work at a grape farm in Pakistan's Qilla Abdullah District on Monday, October 11	A person in a black suit		https://edition.cnn.com/2021/10/14/world/gallery/photos-this-week-october-7-october-14/index.html
94	cnn	imgaes/img_94.jpg	A woman moves her children to safety after armed clashes broke out in the streets of Beirut, Lebanon, on Thursday, October 14.	A person holding a microphone with two children		https://edition.cnn.com/2021/10/14/world/gallery/photos-this-week-october-7-october-14/index.html
95	cnn	imgaes/img_95.jpg	Girls sit on a couch from a home overlooking Kabul, Afghanistan, on Thursday, October 14.	A couple of people sitting on a ledge overlooking a city	Afghanistan	https://edition.cnn.com/2021/10/14/world/gallery/photos-this-week-october-7-october-14/index.html
96	alarabiya	imgaes/img_96.jpg	People ride a car at the Ataba metro station, in Cairo, Egypt	A person sitting in a train	Egypt	France’s Alstom wins $1.01 bln contract to upgrade Cairo’s metro | Al Arabiya English
97	alarabiya	imgaes/img_97.jpg	Yemeni model and actress Entisar al-Hammadi.	A person smiling for the camera	Yemen	https://english.alarabiya.net/News/middle-east/2021/11/08/-Houthi-court-in-Yemen-sentences-model-Entesar-al-Hammadi-to-five-years-in-prison-
98	alarabiya	images/img_98.jpg	Yemeni model Entisar al-Hammadi photographed with her friends.	A group of women posing for a photo	Yemen	https://english.alarabiya.net/News/middle-east/2021/11/08/-Houthi-court-in-Yemen-sentences-model-Entesar-al-Hammadi-to-five-years-in-prison-
99	alarabiya	images/img_99.jpg	Men fling cow dung at each other during the annual 'Gore Habba' festival	A group of men in a circle	India	https://english.alarabiya.net/News/world/2021/11/07/India-s-cow-dung-fight-marks-end-of-Diwali-festivities
100	alarabiya	images/img_100.jpg	Saudi Arabia’s King Salman bin Abdulaziz Al Saud	A person sitting at a desk	Saudi Arabia	https://english.alarabiya.net/News/gulf/2021/11/03/Saudi-Arabia-s-King-Salman-stresses-GCC-relations-in-virtual-cabinet-session
101	alarabiya	images/img_101.jpg	US Treasury Secretary Janet Yellen	Janet Yellen speaking into a microphone	USA	http://english.alarabiya.net/business/economy/2021/10/30/G20-leaders-approve-global-minimum-corporate-tax-reform-deal-Yellen-
102	alarabiya	images/img_102.jpg	US President Joe Biden, Germany's Chancellor Angela Merkel, Britain's Prime Minister Boris Johnson and France's President Emmanuel Macron pose for a photo.	Joe Biden, Boris Johnson, Emmanuel Macron, Angela Merkel posing for a photo		http://english.alarabiya.net/News/middle-east/2021/10/30/US-European-leaders-express-grave-growing-concern-over-Iran
103	rtl	images/img_103.jpg	G8 and EU leaders (L-R) Germany's Chancellor Angela Merkel, Russia's President Vladimir Putin, Britain's Prime Minister David Cameron, US President Barack Obama and France's President Francois Hollande stand on the podium for the family photograph	Vladimir Putin, Angela Merkel, Barack Obama posing for a photo		https://www.rt.com/usa/nsa-monitored-world-leaders-692/
104	the nation	images/img_104.jpg	Leaders of BRICS from left, Brazilian President Dilma Rousseff, Indian Prime Minister Narendra Modi, Russian President Vladimir Putin, Chinese President Xi Jinping and South African President Jacob Zuma.	Xi Jinping, Narendra Modi, Jacob Zuma, Vladimir Putin, Dilma Rousseff standing in front of flags		http://www.thenation.com/article/archive/who-rules-the-world/
105	pure people	images/img_105.jpg	Andrzej Duda, Kolinda Grabar-Kitarovi, Angela Merkel, Emmanuel Macron, Charles Michel à Bruxelles le 27 mai 2018.	Raimonds V?jonis, Andrzej Duda, Angela Merkel, Mariano Rajoy, Emmanuel Macron, Charles Michel, Kolinda Grabar-Kitarovic, Dalia Grybauskaite posing for a photo		https://www.purepeople.com/media/andrzej-duda-kolinda-grabar-kitarovi_m4188338
106	reuters	images/img_106.jpg	A woman breastfeeds her baby while she walks in a migrant caravan heading to Mexico City, in Pijijiapan, Mexico November 4, 2021.	A person carrying a child	Mexico	https://www.reuters.com/news/picture/migrant-caravan-limps-north-through-mexi-idUSRTXJK8A3
107	reuters	images/img_107.jpg	Migrants ride on the back of a truck to avoid walking as they take part in caravan heading to Mexico City, in Juan Sabines Gutierrez, Mexico	A group of people sitting on a vehicle with a group of people standing behind them	Mexico	https://www.reuters.com/news/picture/migrant-caravan-limps-north-through-mexi-idUSRTXJK8A4
108	reuters	images/img_108.jpg	Migrants rest on a road before continuing their journey as they take part in a caravan heading to Mexico City, in Juan Sabines Gutierrez, Mexico	A group of people sitting on the ground	Mexico	https://www.reuters.com/news/picture/migrant-caravan-limps-north-through-mexi-idUSRTXJK8A5
109	reuters	images/img_109.jpg	Migrants walk in a caravan heading to Mexico City, in Pijijiapan, Mexico November 4	The large crowd of people on the street	Mexico	https://www.reuters.com/news/picture/migrant-caravan-limps-north-through-mexi-idUSRTXJK8A6
110	reuters	images/img_110.jpg	Migrants transport their children on shopping cart as they take part in a caravan heading to Mexico City, in Hermenegildo Galeana, Mexico	A group of people stand around a bench	Mexico	https://www.reuters.com/news/picture/migrant-caravan-limps-north-through-mexi-idUSRTXJK8A7
111	reuters	images/img_111.jpg	A migrant woman gives a foot massage to her husband as they take part in a caravan heading to Mexico City, in Pijijiapan, Mexico	A person holding the hands together	Mexico	https://www.reuters.com/news/picture/migrant-caravan-limps-north-through-mexi-idUSRTXJK8A8
112	reuters	images/img_112.jpg	A migrant ride hanging off the back of a truck to avoid walking as they take part in caravan heading to Mexico City, in Los Amates, Mexico	A truck with lights on	Mexico	https://www.reuters.com/news/picture/migrant-caravan-limps-north-through-mexi-idUSRTXJK8A9
113	reuters	images/img_113.jpg	Migrants ride hanging off a truck door to avoid walking as they take part in caravan heading to Mexico City, in Juan Sabines Gutierrez, Mexico	A group of people ride on a truck	Mexico	https://www.reuters.com/news/picture/migrant-caravan-limps-north-through-mexi-idUSRTXJK8A10
114	reuters	images/img_114.jpg	A migrant man walks with the helped of his wife and a crutch as they take part in a caravan heading to Mexico City, in Pijijiapan, Mexico	A man and woman walking down a road	Mexico	https://www.reuters.com/news/picture/migrant-caravan-limps-north-through-mexi-idUSRTXJK8A11
115	reuters	images/img_115.jpg	Migrants ride on the back of a truck to avoid walking as they take part in caravan heading to Mexico City, in Juan Sabines Gutierrez, Mexico	A group of people on motorcycles	Mexico	https://www.reuters.com/news/picture/migrant-caravan-limps-north-through-mexi-idUSRTXJK8A12
116	reuters	images/img_116.jpg	A migrant man rests on the side of the road before continuing walking as he takes part in a caravan heading to Mexico City, in Pijijiapan, Mexico	A pair of feet with pink shoes	Mexico	https://www.reuters.com/news/picture/migrant-caravan-limps-north-through-mexi-idUSRTXJK8A13
117	reuters	images/img_117.jpg	A migrant man places a bandage on his knee after a clash with members of the National Guard as he takes part in a caravan heading to Mexico City, in Pijijiapan, Mexico	A migrant man places a bandage on his knee after a clash with members of the National Guard as he takes part in a caravan heading to Mexico City, in Pijijiapan, Mexico	Mexico	https://www.reuters.com/news/picture/migrant-caravan-limps-north-through-mexi-idUSRTXJK8A14
118	reuters	images/img_118.jpg	An agent of the National Guard stands guard while the migrants from a caravan walk through a checkpoint heading to Mexico City, in Pijijiapan, Mexico	A crowd of people at an event	Mexico	https://www.reuters.com/news/picture/migrant-caravan-limps-north-through-mexi-idUSRTXJK8A15
119	reuters	images/img_119.jpg	Migrants hang from the back of a cargo truck as they take part in caravan heading to Mexico City, in Pijijiapan, Mexico	A group of people standing on a stage	Mexico	https://www.reuters.com/news/picture/migrant-caravan-limps-north-through-mexi-idUSRTXJK8A16
120	reuters	images/img_120.jpg	Migrants rest on the side of the road before continuing walking as they take part in a caravan heading to Mexico City, in Pijijiapan, Mexico	A woman lying on a man's back	Mexico	https://www.reuters.com/news/picture/migrant-caravan-limps-north-through-mexi-idUSRTXJK8A17
121	reuters	images/img_121.jpg	Migrants rest as they take part in a caravan heading to Mexico City, in Nuevo Milenio Valdivia, Mexico	A person lying on the grass with a can of soda	Mexico	https://www.reuters.com/news/picture/migrant-caravan-limps-north-through-mexi-idUSRTXJK8A18
122	reuters	images/img_122.jpg	Migrants rest as they take part in a caravan heading to Mexico City, in Nuevo Milenio Valdivia, Mexico	A group of people lying on the beach	Mexico	https://www.reuters.com/news/picture/migrant-caravan-limps-north-through-mexi-idUSRTXJK8A19
123	reuters	images/img_123.jpg	Migrants rest as they take part in a caravan heading to Mexico City, in Nuevo Milenio Valdivia, Mexico	A group of people sitting on the ground	Mexico	https://www.reuters.com/news/picture/migrant-caravan-limps-north-through-mexi-idUSRTXJK8A20
124	reuters	images/img_124.jpg	A migrant family sleeps before continuing their walk as they take part in a caravan heading to Mexico City, in Mapastepec, Mexico	A group of children lying on the ground	Mexico	https://www.reuters.com/news/picture/migrant-caravan-limps-north-through-mexi-idUSRTXJK8A21
125	reuters	images/img_125.jpg	Migrants continue walking as they take part in a caravan heading to Mexico City, in Mapastepec, Mexico	A group of people outside	Mexico	https://www.reuters.com/news/picture/migrant-caravan-limps-north-through-mexi-idUSRTXJK8A22
126	reuters	images/img_126.jpg	Britain's Prime Minister Theresa May and President Donald Trump walk away after holding a joint news conference at Chequers, the official country residence of the Prime Minister, near Aylesbury, Britain, July 13, 2018	Donald Trump et al. shaking hands	UK	https://www.reuters.com/news/picture/trump-on-the-world-stage-idUSRTX8MDMY
127	reuters	images/img_127.jpg	Russian President Vladimir Putin and British Prime Minister Theresa May shake hands during their meeting on the sidelines, June 28.	Vladimir Putin, Theresa May shaking hands		https://www.reuters.com/news/picture/inside-the-g20-idUSRTS2JWSX
128	reuters	images/img_128.jpg	U.S. President Donald Trump, India's Prime Minister Narendra Modi and Japan's Prime Minister Shinzo Abe hold a trilateral meeting during the G20 leaders summit in Osaka, Japan	Donald Trump, Shinzo Abe et al. are posing for a picture		https://www.reuters.com/news/picture/inside-the-g20-idUSRTS2JWSX
129	reuters	images/img_129.jpg	Saudi Arabia's Crown Prince Mohammed bin Salman shakes hands with U.S. President Donald Trump during a family photo session at the G20 leaders summit in Osaka, Japan,	Prayut Chan-o-cha, Narendra Modi, Scott Morrison, Theresa May, Marcelo Ebrard et al. posing for a photo		https://www.reuters.com/news/picture/inside-the-g20-idUSRTS2JWSX
130	reuters	images/img_130.jpg	A member of Taliban security forces stands guard among crowds of people walking past in a street in Kabul, Afghanistan	A group of people standing outside	Afghanistan	https://www.reuters.com/world/asia-pacific/islamic-state-violence-dents-taliban-claims-safer-afghanistan-2021-11-09/
131	reuters	images/img_131.jpg	Medical workers wearing personal protective equipment carry a patient on a stretcher, as she arrives on an ambulance at the coronavirus disease (COVID-19) ward of the Ippokrateio General Hospital in Thessaloniki, Greece	A person in a wheelchair	Greece	https://www.reuters.com/business/healthcare-pharmaceuticals/global-covid-19-cases-near-250-million-delta-surge-eases-2021-11-07/
132	reuters	images/img_132.jpg	Specialists wearing personal protective equipment (PPE) spray disinfectant while sanitizing the Kazansky railway station amid the outbreak of the coronavirus disease (COVID-19) in Moscow, Russia	A group of people in yellow suits	Russia	https://www.reuters.com/business/healthcare-pharmaceuticals/global-covid-19-cases-near-250-million-delta-surge-eases-2021-11-07/
133	reuters	images/img_133.jpg	A health worker stands near an ambulance carrying a COVID-19 patient, as they wait in the queue at a hospital for people infected with the coronavirus disease in Kyiv, Ukraine	Graphical user interface	Ukraine	https://www.reuters.com/business/healthcare-pharmaceuticals/global-covid-19-cases-near-250-million-delta-surge-eases-2021-11-07/
134	reuters	images/img_134.jpg	Migrants gather near a barbed wire fence in an attempt to cross the border with Poland in the Grodno region, Belarus	A group of people in a forest	Belarus	https://www.reuters.com/world/europe/hundreds-migrants-remain-poland-belarus-border-temperatures-drop-2021-11-09/
135	reuters	images/img_135.jpg	Migrants gather on the Belarusian-Polish border in the Grodno region, Belarus November 8, 2021.	A man smoking a cigarette	Poland	https://www.reuters.com/world/europe/hundreds-migrants-remain-poland-belarus-border-temperatures-drop-2021-11-09/
136	reuters	images/img_136.jpg	Migrants sit around a fire near a barbed wire fence in an attempt to cross the border with Poland in the Grodno region, Belarus	A group of people sitting around a fire	Belarus	https://www.reuters.com/world/europe/hundreds-migrants-remain-poland-belarus-border-temperatures-drop-2021-11-09/
137	reuters	images/img_137.jpg	A migrant lies on the ground next to a barbed wire fence on the Belarusian-Polish border in the Grodno region, Belarus	A person lying on their back in front of a waterfall	Belarus	https://www.reuters.com/world/europe/hundreds-migrants-remain-poland-belarus-border-temperatures-drop-2021-11-09/
138	reuters	images/img_138.jpg	Polish law enforcement officers and frontier guards stand next to a barbed wire fence as hundreds of migrants gather on the Belarusian-Polish border in an attempt to cross it in the Grodno region, Belarus	A group of people in riot gear	Poland	https://www.reuters.com/world/europe/hundreds-migrants-remain-poland-belarus-border-temperatures-drop-2021-11-09/
139	reuters	images/img_139.jpg	Tokyo 2020 Paralympic Games - Wheelchair Tennis - Quad Singles Semifinal - Dylan Alcott	Dylan Alcott in a wheelchair		https://www.reuters.com/lifestyle/sports/wheelchair-champion-alcott-retire-after-australian-open-2021-11-09/
140	reuters	images/img_140.jpg	Regas Woods competes in the high jump final during the Paralympic Games in Rio de Janeiro, Brazil.	A man jumping in the air	Brazil	https://culturafotografica.es/claves-fotografia-deportiva/
141	reuters	images/img_141.jpg	The US’s Regas Woods of competing in the long jump at the Rio paralympics.	A man jumping in the air with a ski	Brazil	https://theconversation.com/the-odds-are-stacked-against-athletes-from-poor-countries-in-paralympic-sport-70345
142	reuters	images/img_142.jpg	Femita Ayanbeku is competing at the Tokyo Paralympics	A woman running on a track	Japan	https://www.runnersworld.com/training/a33323222/how-paralympian-femita-ayanbeku-strength-trains/
143	reuters	images/img_143.jpg	Top 10 Paralympians who inspire us ahead of Rio 2016	Ellie Simmonds et al. in wheelchairs		https://bianet.org/bianet/dunya/140565-paralimpik-oyunlari-basliyor
144	the guadrian	images/img_144.jpg	Germany’s Reinhold Bötzel competes in the T47 men’s high jump final.	A man wearing a yellow hat and gloves holding a bar		https://www.theguardian.com/sport/gallery/2016/sep/17/paralympic-games-2016-day-nine-in-pictures
145	the guadrian	images/img_145.jpg	China’s Yajing Huang exits the pool after competing in the S7 women’s 100m freestyle.	A person jumping over a pool		https://www.theguardian.com/sport/gallery/2016/sep/17/paralympic-games-2016-day-nine-in-pictures
146	the guadrian	images/img_146.jpg	USA’s Rebecca Murray falls during the women’s wheelchair basketball final against Germany.	A woman in a wheelchair		https://www.theguardian.com/sport/gallery/2016/sep/17/paralympic-games-2016-day-nine-in-pictures
147	the guadrian	images/img_147.jpg	Switzerland’s Roger Bolliger and Japan’s Shota Kawamoto ride in the men’s para-cycling road race in Pontal.	A couple of men riding bikes		https://www.theguardian.com/sport/gallery/2016/sep/17/paralympic-games-2016-day-nine-in-pictures
148	the guadrian	images/img_148.jpg	David Brown of USA and his guide Mason Rhodes compete in heat 1 of the men’s T11 400m.	A couple of men wearing sports uniforms		https://www.theguardian.com/sport/gallery/2016/sep/17/paralympic-games-2016-day-nine-in-pictures
149	the guadrian	images/img_149.jpg	Britain’s Claire Cashmore dives in on her way to taking gold in the women’s 4x100m medley relay.	A person swimming in a pool		https://www.theguardian.com/sport/gallery/2016/sep/17/paralympic-games-2016-day-nine-in-pictures
150	the guadrian	images/img_150.jpg	Iran’s 8’1” Morteza Mehrzadselakjani (fourth right) sings the national anthem before the men’s sitting volleyball semi-final between Brazil and Iran. Mehrzadselakjani is reportedly the tallest Paralympian of all time.	A group of people in green shirts	Iran	https://www.theguardian.com/sport/gallery/2016/sep/17/paralympic-games-2016-day-nine-in-pictures
151	the guadrian	images/img_151.jpg	Stinna Kaastrup of Denmark rides Smarties to a bronze medal in the individual freestyle test grade IB during the dressage.	A person riding a horse		https://www.theguardian.com/sport/gallery/2016/sep/17/paralympic-games-2016-day-nine-in-pictures
152	the guadrian	images/img_152.jpg	Canadian men’s wheelchair basketball player Adam Lancia kisses his wife Jamey Jewells after the playoff match between Canada and China.	A man in a wheelchair kissing a woman in a wheelchair	Canada	https://www.theguardian.com/sport/gallery/2016/sep/17/paralympic-games-2016-day-nine-in-pictures
153	the guadrian	images/img_153.jpg	Australia’s Ryley Batt prepares for his team’s wheelchair rugby – or ‘muderball’ – group A match against Canada.	A person sitting at a table with a cart full of luggage	Canada	https://www.theguardian.com/sport/gallery/2016/sep/17/paralympic-games-2016-day-nine-in-pictures
154	the guadrian	images/img_154.jpg	Italy’s silver medal winner Alessandro ‘Alex’ Zanardi, right, and South Africa’s gold medal winner Ernst van Dyk, celebrate at the end of the men’s hand-cycling road race – H5	A couple of men in a race car	Italy	https://www.theguardian.com/sport/gallery/2016/sep/16/paralympic-games-2016-day-eight-in-pictures
155	the guadrian	images/img_155.jpg	Australia’s Scott Reardon reacts after winning the men’s 100m - T42 final	A person in a yellow shirt	Australia	https://www.theguardian.com/sport/gallery/2016/sep/16/paralympic-games-2016-day-eight-in-pictures
156	the guadrian	images/img_156.jpg	Ananias Shikongo of Namibia celebrates with his guide Even Tjiviju, right, after winning the gold medal in the men’s 200m - T11 final	A group of men running		https://www.theguardian.com/sport/gallery/2016/sep/16/paralympic-games-2016-day-eight-in-pictures
157	the guadrian	images/img_157.jpg	Woman from the series Tribute to Indigenous Stock Women by David Prichard Taylor	A person sitting on a chair		https://www.theguardian.com/artanddesign/gallery/2021/nov/09/the-years-best-portrait-photography-in-pictures-taylor-wessing-prize
158	the guadrian	images/img_158.jpg	Man sitting on a chair.	A man sitting on a chair		https://www.theguardian.com/artanddesign/gallery/2021/nov/09/the-years-best-portrait-photography-in-pictures-taylor-wessing-prize
159	the guadrian	images/img_159.jpg	A young boy holding a tree seedling with one of its leaves wrapped on a polythene bag, a straw comes out seemingly from his nostrils to the bag as though is giving it air.	A man wearing a mask		http://www.theguardian.com/world/gallery/2021/nov/08/environmental-photographer-of-the-year-2021-in-pictures
160	the guadrian	images/img_160.jpg	Researchers weigh an anaesthetised Polar bear on Franz Josef Land in the Arctic Ocean during the Umka 2021 expedition organised by the Russian Geographical Society.	A group of people climbing a mountain	Russia	http://www.theguardian.com/world/gallery/2021/nov/08/environmental-photographer-of-the-year-2021-in-pictures
161	the guadrian	images/img_161.jpg	A busy polluted waterway on Buriganga River is filled with boats and their passengers on the morning work commute to the densely populated city of Dhaka,	A group of people in a circle		http://www.theguardian.com/world/gallery/2021/nov/08/environmental-photographer-of-the-year-2021-in-pictures
162	the guadrian	images/img_162.jpg	Workers sit surrounded by bundles of incense sticks in Quang Phu Cau village in Hanoi, Vietnam.	A group of flowers	Vietnam	http://www.theguardian.com/world/gallery/2021/nov/08/environmental-photographer-of-the-year-2021-in-pictures
163	the guadrian	images/img_163.jpg	A child sits on a ladder in a plastic bottle recycling factory in Bangladesh.	A person sitting in a pile of garbage	Bangladesh	http://www.theguardian.com/world/gallery/2021/nov/08/environmental-photographer-of-the-year-2021-in-pictures
164	the guadrian	images/img_164.jpg	Donals Trump, right, talks with German chancellor Angela Merkel, surrounded by other G7 leaders and their advisers.	Shinzo Abe, Yasutoshi Nishimura et al. standing around a table		http://www.theguardian.com/world/2018/jun/10/angela-merkel-photo-donald-trump-diplomacy
165	the guadrian	images/img_165.jpg	Angela Merkel at the G8 summit in Heiligendamm, Germany, in 2007.	Angela Merkel, Romano Prodi, Nicolas Sarkozy, Vladimir Putin et al. standing together		https://www.theguardian.com/world/gallery/2021/sep/24/angela-merkels-long-reign-as-chancellor-of-germany-in-pictures
166	the guadrian	images/img_166.jpg	A portrait of Merkel is hung on a wall along with those of the former chancellors (top, L-R) Konrad Adenauer, Ludwig Erhard, Kurt Georg Kiesinger, Willy Brandt and (bottom, L-R) Helmut Schmidt, Helmut Kohl and Gerhard Schroeder in a pub in Berlin, 2005	Helmut Kohl, Gerhard Schröder, Angela Merkel, Kurt Georg Kiesinger, Helmut Schmidt, Willy Brandt, Konrad Adenauer, Ludwig Erhard are posing for a picture		https://www.theguardian.com/world/gallery/2021/sep/24/angela-merkels-long-reign-as-chancellor-of-germany-in-pictures
167	the guadrian	images/img_167.jpg	Merkel talks with a soldier of the Bundeswehr in Saxony-Anhalt in 2006	A person in a blue jacket	Germany	https://www.theguardian.com/world/gallery/2021/sep/24/angela-merkels-long-reign-as-chancellor-of-germany-in-pictures
168	the guadrian	images/img_168.jpg	Merkel at the G8 summit in Heiligendamm, Germany, in 2007	Angela Merkel, Tony Blair, Romano Prodi et al. standing together	Germany	https://www.theguardian.com/world/gallery/2021/sep/24/angela-merkels-long-reign-as-chancellor-of-germany-in-pictures
169	the guadrian	images/img_169.jpg	Merkel sits between Vladimir Putin and George W Bush at the G8 summit in Heiligendamm in 2007	Angela Merkel, George W. Bush et al. are posing for a picture	Germany	https://www.theguardian.com/world/gallery/2021/sep/24/angela-merkels-long-reign-as-chancellor-of-germany-in-pictures
170	the guadrian	images/img_170.jpg	Merkel sits with France’s Nicolas Sarkozy at the Royal Palace of Brussels at the start of an Asia-Europe meeting in 2010	Angela Merkel, Nicolas Sarkozy et al. looking at a paper	Germany	https://www.theguardian.com/world/gallery/2021/sep/24/angela-merkels-long-reign-as-chancellor-of-germany-in-pictures
171	the guadrian	images/img_171.jpg	Celebrating with the national football team after a 4-0 win against Portugal in the 2014 World Cup in Brazil	Mario Gotze, Toni Kroos, Mats Hummels, Thomas Muller, Jerome Boateng, Sami Khedira, Ron-Robert Zieler, Roman Weidenfeller, Shkodran Mustafi, Erik Durm, Philipp Lahm, Mesut Ozil, Bastian Schweinsteiger, Miroslav Klose, Julian Draxler, Lukas Podolski et al. posing for a photo	Brazil	https://www.theguardian.com/world/gallery/2021/sep/24/angela-merkels-long-reign-as-chancellor-of-germany-in-pictures
172	the guadrian	images/img_172.jpg	Shukria Barakzai, an Afghan politician, takes a selfie with Merkel after a G7 women’s dialogue forum at the chancellery in Berlin, 2015	Angela Merkel, Shukria Barakzai taking a selfie	Germany	https://www.theguardian.com/world/gallery/2021/sep/24/angela-merkels-long-reign-as-chancellor-of-germany-in-pictures
173	the guadrian	images/img_173.jpg	Merkel chats with a young woman during a welcoming ceremony at Nizip refugee camp near Gaziantep, Turkey, 2016	A person holding a bouquet of flowers	Turkey	https://www.theguardian.com/world/gallery/2021/sep/24/angela-merkels-long-reign-as-chancellor-of-germany-in-pictures
174	the guadrian	images/img_174.jpg	Merkel rolls her eyes while talking with Vladimir Putin at the start of the G20 Hamburg summit in 2017	Vladimir Putin, Angela Merkel et al. in suits		https://www.theguardian.com/world/gallery/2021/sep/24/angela-merkels-long-reign-as-chancellor-of-germany-in-pictures
175	the guadrian	images/img_175.jpg	Merkel attends a reception of carnival societies at the chancellery in Berlin in 2019	Angela Merkel et al. wearing clothing	Germany	https://www.theguardian.com/world/gallery/2021/sep/24/angela-merkels-long-reign-as-chancellor-of-germany-in-pictures
176	the guadrian	images/img_176.jpg	Theresa May, the UK prime minister, with Merkel at a European Council meeting on Brexit in 2019	A man showing a man something on the tablet		https://www.theguardian.com/world/gallery/2021/sep/24/angela-merkels-long-reign-as-chancellor-of-germany-in-pictures
177	the guadrian	images/img_177.jpg	The picture of ‘Trump’ holding a rifle - one of the more politically sensitive pictures.	A person holding a gun and a boy with a hat	USA	https://www.theguardian.com/artanddesign/2016/dec/08/artist-alison-jackson-self-publishes-spoof-trump-photos-despite-fear-of-being-sued
178	the guadrian	images/img_178.jpg	‘Donald Trump’ in the Oval Office.	A group of women in clothing		https://www.theguardian.com/artanddesign/2016/dec/08/artist-alison-jackson-self-publishes-spoof-trump-photos-despite-fear-of-being-sued
179	the guadrian	images/img_179.jpg	President Donald Trump and first lady Melania Trump’s Christmas portrait.	Melania Trump et al. in formal wear standing in front of a christmas tree		https://www.theguardian.com/us-news/2018/dec/21/trump-portrait-you-couldnt-create-a-creepier-yuletide-scene-if-you-tried
180	newstalkzb	images/img_180.jpg	Jacinda Ardern has joined other world leaders in condemning Donald Trump's latest comments.	Donald Trump, Jacinda Ardern		https://www.newstalkzb.co.nz/news/politics/prime-minister-jacinda-ardern-condemns-donald-trumps-attack-on-us-congresswomen/
181	the straits times	images/img_181.jpg	Some of the world's youngest leaders include (from left) New Zealand Prime Minister Jacinda Ardern, Ireland's Prime Minister Leo Varadkar and Austria's chancellor-in-waiting Sebastian Kurz	Jacinda Ardern, Sebastian Kurz, Leo Varadkar talking into a microphone		https://www.straitstimes.com/world/emmanuel-macron-becomes-french-president-at-39-a-look-at-young-leaders-around-the-world
182	citynews	images/img_182.jpg	From left to right: Jacinda Ardern, Justin Trudeau, Angela Merkel, and Franklin Delano Roosevelt.	Franklin D. Roosevelt, Jacinda Ardern, Angela Merkel, Justin Trudeau posing for a photo		https://oursecurefuture.org/opinion-insights/part-two-rethinking-successful-leadership-traits-watch-women
183	citynews	images/img_183.jpg	New Zealand Prime Minister Jacinda Ardern, left, with Canadian Prime Minister Justin Trudeau, right.	Justin Trudeau, Jacinda Ardern sitting in chairs with flags behind them		https://calgary.citynews.ca/2019/03/17/justin-trudeau-offers-condolences-in-call-with-new-zealand-pm-jacinda-ardern-2/
184	the news	images/img_184.jpg	Canadian Prime Minister Justin Trudeau (L), Australian Prime Minister Scot Morrison (C) and New Zealand Prime Minister Jacinda Ardern (R).	A collage of Scott Morrison, Justin Trudeau, Jacinda Ardern		https://www.thenews.com.pk/latest/770644-very-distressing-scenes-world-leaders-speak-out-after-capitol-hill-protest
185	the telegraph	images/img_185.jpg	Tsai Ing-wen, Jacinda Ardern, Andela, Merkel	Angela Merkel, Jacinda Ardern, Tsai Ing-wen are posing for a picture		https://www.thenews.com.pk/latest/770644-very-distressing-scenes-world-leaders-speak-out-after-capitol-hill-protest
186	business insider india	images/img_186.jpg	Jacinda Ardern, Boris Johnson and Narendra Modi	Jacinda Ardern, Narendra Modi, Boris Johnson posing for a photo	New Zealand	https://www.businessinsider.in/international/news/from-boris-johnson-to-narendra-modi-and-jacinda-ardern-heres-how-world-leaders-reacted-to-the-capitol-hill-chaos/slidelist/80148270.cms
187	nbc news	images/img_187.jpg	Prime Minister Jacinda Ardern hugs a worshipper at the Kilbirnie Mosque, in Wellington, in March 2019	Jacinda Ardern holding a bird	New Zealand	https://www.nbcnews.com/news/world/new-zealand-s-jacinda-ardern-wins-big-after-world-leading-n1243972
188	nbc news	images/img_188.jpg	High school students from a Christian school give hugs to Muslims waiting for news of their relatives at a community center, in Christchurch, New Zealand, March 18, 2019.	A group of people standing outside	New Zealand	https://abcnews.go.com/International/zealand-prime-minister-jacinda-ardern-vows-stricter-gun/story?id=61759019
189	the straits times	images/img_189.jpg	The #headscarfforharmony movement, launched by an Auckland doctor, encouraged people to wear headscarves on March 22 to show their support for the Muslim community after the christchurch attack in March 2019.	A group of women wearing scarves.	New Zealand	https://www.straitstimes.com/asia/australianz/new-zealand-marks-one-week-since-mosque-attack-with-prayers-headscarves
190	the times of israel	images/img_190.jpg	New Zealand's Prime Minister Jacinda Ardern, center, hugs and consoles a woman as she visited Kilbirnie Mosque to lay flowers among tributes to Christchurch attack victims, in Wellington, March 17, 2019	Grant Robertson holding a baby	New Zealand	https://www.timesofisrael.com/new-zealand-pm-comforts-mourning-muslim-community-after-deadly-mosque-shooting/
191	rnz	images/img_191.jpg	Leaders from four of the Five Eyes nations - Australia's Malcolm Turnbull, Britain's Theresa May, Canada's Justin Trudeau and New Zealand's Jacinda Ardern	Jacinda Ardern, Justin Trudeau, Malcolm Turnbull, Theresa May sitting at a table		https://www.rnz.co.nz/news/on-the-inside/355754/nz-represent-ardern-created-a-moment-on-the-world-stage
192	the indian weekender	images/img_192.jpg	Singapore PM Lee Hsien Loong, from left to right, Bangladesh PM Sheikh Hasina, United Nations Secretary-General Antonio Guterres, PM Narendra Modi, South Korea President Moon Jae-in, New Zealand PM Jacinda Ardern and Jamaica's PM Andrew Holness place hands	Andrew Holness, Narendra Modi, Moon Jae-in, Jacinda Ardern, Antonio Guterres standing around a globe		https://www.indianweekender.co.nz/Pages/ArticleDetails/7/11185/New-Zealand/Jacinda-Ardern-joins-world-leaders-in-inaugurating-Gandhi-solar-park-at-UN?fbclid=IwAR0vdLCZVvVfH59_g8UqHrKRmUXewB7EPG4Wqs_sirI-aN6QW4HJ0tIQzLw
193		images/img_193.jpg	African drumming classes for kids	A group of kids playing drums		www.soulrhythmafricandrumming.com/kids-drumming-classes.html
194	the guardian	images/img_194.jpg	A Palestinian girl dressed in costume stands on the compound known to Muslims as al-Haram al-Sharif (Noble Sanctuary) and to Jews as Temple Mount after prayers	A person holding a fan	Palestine	https://www.theguardian.com/world/gallery/2009/nov/27/islam-religion
195	the guardian	images/img_195.jpg	Ivorian Muslims pray in front of the Fitya mosque of the popular Abobo district of Abidjan, Ivory Coast.	A large group of people in a street	Ivory Coast	https://www.theguardian.com/world/gallery/2009/nov/27/islam-religion
196	the guardian	images/img_196.jpg	Iraqis pray at the grave side of relatives in Baghdad	A person sitting on the ground with flowers and a group of people	Iraq	https://www.theguardian.com/world/gallery/2009/nov/27/islam-religion
197	the guardian	images/img_197.jpg	Kosovar Muslims pray in the streets to mark in Kosovo's capital Pristina	A group of people standing outside	Kosovo	https://www.theguardian.com/world/gallery/2009/nov/27/islam-religion
198	the guardian	images/img_198.jpg	Palestinian children ride the ferris wheel at an amusement park at Sabra and Shatila Palestinian refugee camp	A group of people on a roller coaster	Palestine	https://www.theguardian.com/world/gallery/2009/nov/27/islam-religion
199	the guardian	images/img_199.jpg	Muslim faithfuls attend prayers as part of the Eid al-Adha celebrations at the centuries-old Sunda Kelapa port, Jakarta, Indonesia	A crowd of people standing next to a group of boats	Indonesia
200	the guardian	images/img_200.jpg	Muslims pray during Eid al-Adha celebrations in Wuzhong, Ningxia Hui Autonomous Region,China	A group of men in a field	China
201	the guardian	images/img_201.jpg	People load-down a vehicle as they pass the Burj Dubai tower after attending prayers in Dubai	A group of people on a truck.
202	the guardian	images/img_202.jpg	Traditional palace guards of Emir of Kano, ride on horses after prayers to mark the first day f Eid al-Adha in Kano, Nigeria	A group of people walking	Nigeria
203	the guardian	images/img_203.jpg	Two boys clean the digestive track of a cow, to cook, after scavenging it from the garbage near a fair inKabul, Afghanistan	Two boys clean the digestive track of a cow, to cook, after scavenging it from the garbage near a fair inKabul, Afghanistan	Afghanistan
204	the guardian	images/img_204.jpg	three, boys, one, girl, smile and play with toys	A group of children digging in the dirt		https://pixnio.com/people/children-kids/three-boys-and-one-girl-is-smiling-playing-with-toys
205	the guardian	images/img_205.jpg	Joanne Beavis, left, with Megan Rull attend the Remembrance Day service at the Cenotaph. Rull’s partner killed himself last year after serving in Afghanistan	A group of people walking	USA	https://www.theguardian.com/news/gallery/2021/nov/11/armistice-day-and-clay-art-thursdays-best-photos
206	the guardian	images/img_206.jpg	A member of the special operations group of Jammu and Kashmir police, his face covered, arrives for a surprise check operation in a busy market	A person wearing a black hoodie.	Kashmir	https://www.theguardian.com/news/gallery/2021/nov/11/armistice-day-and-clay-art-thursdays-best-photos
207	the guardian	images/img_207.jpg	Hindus gather on the banks of the Hooghly River during the Chhath festival, when rituals are performed to thank the sun god for sustaining life on Earth	A group of people holding a basket of fruit	India	https://www.theguardian.com/news/gallery/2021/nov/11/armistice-day-and-clay-art-thursdays-best-photos
208	the guardian	images/img_208.jpg	A Palestinian boy watches worshippers praying for rain in the northern Gaza Strip	A group of people holding their hands	Palestine	https://www.theguardian.com/news/gallery/2021/nov/11/armistice-day-and-clay-art-thursdays-best-photos
209	the guardian	images/img_209.jpg	Revellers celebrate in Cologne. The German carnival starts each year on 11 November at 11.11am and festival events continue until Ash Wednesday of the following year	A crowd of people holding signs	Germany	https://www.theguardian.com/news/gallery/2021/nov/11/armistice-day-and-clay-art-thursdays-best-photos
210	the guardian	images/img_210.jpg	From left: Faith Fennidy, Madeline Edwards, Mickey Guyton, and Brittney Spencer embrace after a performance at the annual Country Music Awards at the Bridgestone arena in Tennessee	A group of women in white dresses	USA	https://www.theguardian.com/news/gallery/2021/nov/11/armistice-day-and-clay-art-thursdays-best-photos
211	the guardian	images/img_211.jpg	Sessini’s photographs of Ukraine’s uprising are not nice but they are necessary. They rightly question the horror, violence and hypocrisy that characterise six years of wars at the gates of Europe	A person sitting on a bus	Ukraine	https://www.theguardian.com/artanddesign/gallery/2021/nov/11/surreal-salt-flats-and-abandoned-schools-paris-photo-2021-in-pictures
212	the guardian	images/img_212.jpg	Lubondo discovered the former school of the village Gombe-Matadi in the Kongo-Central province of the Democratic Republic of the Congo through her parents, whose generation see this place as a fantasy, a dream stuck in time. By appearing alongside other models depicted as fictive characters from the past, the photographer has sought to revive the story of a place that bears historical witness to …	A person walking in a room	Democratic Republic of Congo	https://www.theguardian.com/artanddesign/gallery/2021/nov/11/surreal-salt-flats-and-abandoned-schools-paris-photo-2021-in-pictures
213	the guardian	images/img_213.jpg	Migrants gather to receive humanitarian aid from the Belarusian military at a camp at the border between Belarus and Poland. Hundreds of refugees who want to obtain asylum in the European Union have been trapped for three days in low temperatures at the border.	A group of people standing outside	Belarus	https://www.theguardian.com/artanddesign/gallery/2021/nov/12/twenty-photographs-of-the-week
214	the guardian	images/img_214.jpg	Women mourn the death of civilians killed in a reported Turkish drone strike during their funeral procession in the northeastern Syrian Kurdish-majority city of Qamishli.	A person in a red dress	Syria	https://www.theguardian.com/artanddesign/gallery/2021/nov/12/twenty-photographs-of-the-week
215	the guardian	images/img_215.jpg	A woman walks past the ‘Choose Earth’ mural as the Cop26 UN climate change conference takes place in Glasgow.	A person pushing a stroller	Scotland	https://www.theguardian.com/artanddesign/gallery/2021/nov/12/twenty-photographs-of-the-week
216	the guardian	images/img_216.jpg	Bisimwa Hardy, 22, a father of two, who has been working in the Luhihi artisanal mine for seven months to support the needs of his family, carries a rock at the mine	A man wearing a helmet	Democratic Republic of Congo	https://www.theguardian.com/artanddesign/gallery/2021/nov/12/twenty-photographs-of-the-week
217	the guardian	images/img_217.jpg	Communist party supporters carry portraits of Soviet founder Vladimir Lenin and dictator Josef Stalin as they attend a ceremony at Lenin’s mausoleum on Red Square, marking the 104th anniversary of the Bolshevik revolution also known as the October Revolution.	Vladimir Lenin, Joseph Stalin et al. holding flags	Russia	https://www.theguardian.com/artanddesign/gallery/2021/nov/12/twenty-photographs-of-the-week
218	the guardian	images/img_218.jpg	Migrants stop to rest as they travel in a caravan heading to Mexico City.	A group of people lying on the ground	Mexico	https://www.theguardian.com/artanddesign/gallery/2021/nov/12/twenty-photographs-of-the-week
219	the guardian	images/img_219.jpg	Mourners and militants take part in the funeral of Palestinian boy Mohamed Dadis, who the Palestinian health ministry said was killed by Israeli forces.	A group of people holding flags	West Bank	https://www.theguardian.com/artanddesign/gallery/2021/nov/12/twenty-photographs-of-the-week
220	the guardian	images/img_220.jpg	Inmates, children and prison wardens are photographed in the women’s section of Kajiado prison.	A group of people sitting under a tree	Kenya	https://www.theguardian.com/artanddesign/gallery/2021/nov/12/twenty-photographs-of-the-week
221	the guardian	images/img_221.jpg	Residents sit on the doorsteps of their flooded home as water from the Chao Praya river floods low lying areas around the district of Bang Phlat.	A group of people in a flooded area	Thailand	https://www.theguardian.com/artanddesign/gallery/2021/nov/12/twenty-photographs-of-the-week
222	the guardian	images/img_222.jpg	A horse rider performs during a rally held to show support for the government and the Ethiopian National Defence Force in their efforts against the Tigray People’s Liberation Front and Oromo Liberation Army in Addis Ababa.	A man riding a horse in front of a crowd of people	Ethiopia	https://www.theguardian.com/artanddesign/gallery/2021/nov/12/twenty-photographs-of-the-week
223	the guardian	images/img_223.jpg	A staff member rests next to a patient infected with Covid-19 in the intensive care unit of Lozenetz Hospital in Sofia.	A person in a white robe using a laptop	Bulgaria	https://www.theguardian.com/artanddesign/gallery/2021/nov/12/twenty-photographs-of-the-week
224	the guardian	images/img_224.jpg	A view inside the Palace of Saddam Hussein, one of the deposed Iraqi leader’s former palaces, located in the ancient city of Babylon in Babil.	A large room with a large rug and a ceiling with a design	Iraq	https://www.theguardian.com/artanddesign/gallery/2021/nov/12/twenty-photographs-of-the-week
225	the guardian	images/img_225.jpg	A delivery driver rides a scooter past cars covered in snow and leaves following a snowfall in Beijing.	A person driving a lawnmower	China	https://www.theguardian.com/artanddesign/gallery/2021/nov/12/twenty-photographs-of-the-week
226	the guardian	images/img_226.jpg	Reverend Gilberto Vergara blesses a person giving confession in Aguililla.	A man and woman sitting on a bench next to a fence and a building	Mexico	https://www.theguardian.com/artanddesign/gallery/2021/nov/12/twenty-photographs-of-the-week
227	the guardian	images/img_227.jpg	Models working with fashion designer Ndeye Diop Guisse pose for a portrait in front of a disused port crane, whilst wearing traditional Signares outfits.	A woman sitting on a stone wall with a man standing on a boat	Senegal	https://www.theguardian.com/artanddesign/gallery/2021/nov/12/twenty-photographs-of-the-week
228	the guardian	images/img_228.jpg	People wade with their bicycles through a waterlogged road during incessant heavy rains in Chennai.	A group of people sitting on the ground with a person holding a stick	India	https://www.theguardian.com/artanddesign/gallery/2021/nov/12/twenty-photographs-of-the-week
229	the guardian	images/img_229.jpg	Medical personnel test a man at a makeshift testing site near a residential compound that was locked down after a local outbreak of Covid in Beijing.	A group of people sitting at a table outside	China	https://www.theguardian.com/artanddesign/gallery/2021/nov/12/twenty-photographs-of-the-week
230	the guardian	images/img_230.jpg	A devotee takes a dip in the waters of the Yamuna river – amid foam created by pollution – as a part of a ritual for the upcoming Hindu festival of Chhath Puja.	A person standing in the snow	India	https://www.theguardian.com/artanddesign/gallery/2021/nov/12/twenty-photographs-of-the-week
231	the guardian	images/img_231.jpg	Demonstrators gather during a Global Day of Action protest on the sidelines of the Cop26 climate talks in Glasgow.	A large crowd of people	Scotland	https://www.theguardian.com/artanddesign/gallery/2021/nov/12/twenty-photographs-of-the-week
232	the guardian	images/img_232.jpg	Extinction Rebellion protesters during a die-in protest outside the Cop26 venue as final negotiations closed	A group of people holding signs	Scotland	https://www.theguardian.com/environment/gallery/2021/nov/14/cop26-ends-with-glasgow-climate-pact-in-pictures
233	the guardian	images/img_233.jpg	Members of a delegation representing indigenous communities	A group of women posing for a photo	Scotland	https://www.theguardian.com/environment/gallery/2021/nov/13/cop26-goes-into-overtime-in-pictures
234	the guardian	images/img_234.jpg	Carrying red ribbons to represent the crucial red lines already crossed by Cop26 negotiations, hundreds of representatives walked out of the convention centre in Glasgow on the final morning of the summit in protest	A person holding a rope	Scotland	https://www.theguardian.com/environment/gallery/2021/nov/13/cop26-goes-into-overtime-in-pictures
235	the guardian	images/img_235.jpg	Climate activists hold a demonstration in the venue during the official final day	A group of people holding signs	Scotland	https://www.theguardian.com/environment/gallery/2021/nov/13/cop26-goes-into-overtime-in-pictures
236	the guardian	images/img_236.jpg	Delegates chat at the people’s plenary.	A group of people sitting in a room	Scotland	https://www.theguardian.com/environment/gallery/2021/nov/13/cop26-goes-into-overtime-in-pictures
237	the guardian	images/img_237.jpg	John Kerry, the United States special presidential envoy for climate (left) attends a plenary session	John Kerry in a suit and tie	Scotland	https://www.theguardian.com/environment/gallery/2021/nov/13/cop26-goes-into-overtime-in-pictures
238	the guardian	images/img_238.jpg	A young girl helps plant native trees with Noosa Landcare, Queensland, as part of a vision to link up isolated blocks of forest to one day become a wildlife corridor.	A child wearing a hat	Australia	https://www.theguardian.com/environment/gallery/2021/nov/12/deforestation-in-australia-a-wanton-assault-on-wildlife-in-pictures
239	the guardian	images/img_239.jpg	A girl fills jugs and buckets with water in the courtyard of Mousab bin Omayer school in Tal Tamr, a town in north-east Syria.	A person and a child standing in front of a blue wall	Syria	https://preview.vision.azure.com/demo/image-captioning
240	the guardian	images/img_240.jpg	Trucks transport water from wells in the countryside east of Hasakah to the city. Here, they sell water to smaller trucks that deliver it to households around the city. In the background is a small station that was used to transfer water from Alouk water station near Ras al-Ayn to Khashman neighbourhood in Hasakah. But since the Turkish occupation of Alouk in October 2019, water has been repeated…	A person standing on a truck with a pile of potatoes	Syria	https://preview.vision.azure.com/demo/image-captioning
241	the guardian	images/img_241.jpg	Ahmad Mahmoud Alahri, 62, and his brother have lost 6,000 of their 8,000 olive, lemon and fruit trees. Roughly half were destroyed by Islamic State militants, and half in the past year due to droughts.	A man standing in a field	Syria	https://preview.vision.azure.com/demo/image-captioning
242	the guardian	images/img_242.jpg	Mohammed Abdo (right), 60, co-chair of the local commune, and his wife’s sister Berivan (an unemployed civil engineer).	A man and a woman sitting on a couch	Syria	https://preview.vision.azure.com/demo/image-captioning
243	the guardian	images/img_243.jpg	Engineer Khaled Abdaljabr looks at an empty pool that used to purify water for Hasakah at al-Himma water station	A person standing on a roof	Syria	https://preview.vision.azure.com/demo/image-captioning
244	the guardian	images/img_244.jpg	The paediatric ward at Hasakah national hospital. Most children have been admitted due to water-related illnesses: diarrhoea, vomiting, and enteritis (inflammation of the small intestine).	A group of people sitting on beds	Syria	https://preview.vision.azure.com/demo/image-captioning
245	the guardian	images/img_245.jpg	Sara Omar Dawoud. a paediatric nurse at Hasakah national hospital.	A man in a hospital gown	Syria	https://preview.vision.azure.com/demo/image-captioning
246	the guardian	images/img_246.jpg	Ten-month-old Rashem with his mother. She came to the hospital after Rashem had diarrhoea for two days and stopped eating	A person holding a baby	Syria	https://preview.vision.azure.com/demo/image-captioning
247	the guardian	images/img_247.jpg	Workers on the Tabqa dam, the construction of which created Lake Assad, replace pipes.	A group of men working on a pipe	Syria	https://preview.vision.azure.com/demo/image-captioning
248	the guardian	images/img_248.jpg	A sign inside the dam indicating the floor has been cleared of mines. The dam was controlled by IS until 2017	A sign on a wall	Syria	https://preview.vision.azure.com/demo/image-captioning
249	the guardian	images/img_249.jpg	Women and their children on the shores of the Euphrates in Raqqa. The river used to be too dangerous to swim in at this point, but since January the flow from Turkey into Syria has been significantly less than normal, leading to critically low-water levels	A group of people sitting on a rock by a body of water	Syria	https://preview.vision.azure.com/demo/image-captioning
250	the guardian	images/img_250.jpg	The water level in this lake near Hasakah, which is normally fed by the Khabour, has become so low that local people have been able to catch fish with their hands	A person standing next to a pile of fish	Syria	https://preview.vision.azure.com/demo/image-captioning
251	the guardian	images/img_251.jpg	Abdo (centre) with local farmers. The drought-like conditions have severely affected farming. Water from makeshift wells is too salty and unsuitable for crops.	A group of people standing in a field	Syria	https://preview.vision.azure.com/demo/image-captioning
252	the guardian	images/img_252.jpg	Ronaz Younes, co-chair of Tal Tamr municipality, in her office, under a picture of Abdullah Öcalan (also known as ‘Apo’) who co-founded the Kurdistan Workers’ party (PKK)	A woman sitting in a chair	Kurdistan	https://preview.vision.azure.com/demo/image-captioning
253	the guardian	images/img_253.jpg	A man among the graves in Hasakah martyrs cemetery, where several fighters who died in the Turkish attack in October 2019 are buried	A man standing in front of a cemetery	Syria	https://preview.vision.azure.com/demo/image-captioning
254	the guardian	images/img_254.jpg	A woman and her child at sunset in the rural village of Dawdiyye, 6 miles north of Hasakah.	A person and a child walking in a dry landscape	Syria	https://preview.vision.azure.com/demo/image-captioning
255	the guardian	images/img_255.jpg	Storm (back), a 10-metre tall goddess of the sea puppet who carries a message of the oceans in crisis, meets Little Amal, a 3.5-metre tall 10-year-old Syrian refugee puppet	A person posing with a person in a garment	Scotland	https://www.theguardian.com/environment/gallery/2021/nov/11/us-china-deal-puppet-meeting-day-10-cop26-in-pictures
256	the guardian	images/img_256.jpg	Dr Pasang Dolma Sherpa, executive director of the Center for Indigenous Peoples’ Research and Development, Nepal, speaks at the event, where she drew attention to the role played by Indigenous people in protecting 80% of biodiversity, although they represent only 6% of the global population	A person sitting at a desk	Scotland	https://www.theguardian.com/environment/gallery/2021/nov/10/gender-equality-and-indigenous-people-day-nine-at-cop26-in-pictures
257	the guardian	images/img_257.jpg	Protester hold banners reading ‘net zero is not zero’	A man standing on a stage with a sign	Scotland	https://www.theguardian.com/environment/gallery/2021/nov/10/gender-equality-and-indigenous-people-day-nine-at-cop26-in-pictures
258	the guardian	images/img_258.jpg	Indian artist Shilo Shiv Suleman, part of the Fearless Collective, paints a mural depicting indigenous leaders of unrecognised lands	A woman with a gun and a man with a gun	Scotland	https://www.theguardian.com/environment/gallery/2021/nov/10/gender-equality-and-indigenous-people-day-nine-at-cop26-in-pictures
259	the guardian	images/img_259.jpg	The climate envoy of the Republic of the Marshall Islands, Tina Stege, speaks during a news conference	Graphical user interface, text	Republic of the Marshall Islands	https://www.theguardian.com/environment/gallery/2021/nov/10/gender-equality-and-indigenous-people-day-nine-at-cop26-in-pictures
260	the guardian	images/img_260.jpg	Isatou Touray, vice-president of the Gambia, addresses delegates on day 10 of the summit, which was focused on gender, science and innovation	A person holding a certificate	Gambia	https://www.theguardian.com/environment/gallery/2021/nov/10/gender-equality-and-indigenous-people-day-nine-at-cop26-in-pictures
261	the guardian	images/img_261.jpg	‘World Leaders: Last Call for Climate Action’, an artistic installation in Glasgow Canal, shows activists dressed as politicians on a sinking UN negotiation stage to indicate the urgency for climate action	A group of people sitting in a pool	Scotland	https://www.theguardian.com/environment/gallery/2021/nov/10/gender-equality-and-indigenous-people-day-nine-at-cop26-in-pictures
262	the guardian	images/img_262.jpg	During the Advancing Gender Equality in Climate Action event Brianna Fruean, an activist and environmental advocate from Samoa, speaks as the giant puppet Little Amal stands behind her	Brianna Fruean in a graduation gown holding a diploma	Scotland	https://www.theguardian.com/environment/gallery/2021/nov/10/gender-equality-and-indigenous-people-day-nine-at-cop26-in-pictures
263	the guardian	images/img_263.jpg	A delegate takes a selfie with Nancy Pelosi	A person taking a selfie with a person in a red dress	Scotland	https://www.theguardian.com/environment/gallery/2021/nov/10/gender-equality-and-indigenous-people-day-nine-at-cop26-in-pictures
264	the guardian	images/img_264.jpg	Protesters organise a traditional Scottish cèilidh dance with live music	A group of people in clothing	Scotland	https://www.theguardian.com/environment/gallery/2021/nov/10/gender-equality-and-indigenous-people-day-nine-at-cop26-in-pictures
265	the guardian	images/img_265.jpg	Raiz do Mundo is a feminine knowledge passed from generation to generation about self-support and planting as a human right, and connection with the energies of nature, explain Fábio Setti and Tamara dos Santos. Their work splits into two phases: the first is about connection with ancestry and spirituality – represented by a young Black woman in a garden. The second is about female organisation, …	A group of women wearing hats and holding fruits		https://www.theguardian.com/environment/gallery/2021/oct/31/colour-climate-crisis-in-pictures
266	the guardian	images/img_266.jpg	Jockeys compete during the annual one-day Laytown races held on the beach under official horse racing turf club rules, which has returned after being cancelled for the past two years due to Covid-19.	Jockeys racing horses on a track	Ireland	https://www.theguardian.com/news/gallery/2021/nov/01/plastic-waste-and-peter-pan-dogs-mondays-best-photos
267	the guardian	images/img_267.jpg	A visitor looks at tapestries during the opening of the exhibition “The Lady with the Unicorn” at the Musee des Abattoirs.	A person looking at art on a wall	France	https://www.theguardian.com/news/gallery/2021/nov/01/plastic-waste-and-peter-pan-dogs-mondays-best-photos
268	the guardian	images/img_268.jpg	Female firearms trainer Mona Al Khurais instructs a young man on the safe usage of weapons at the Top-Gun shooting range.	A couple of people wearing masks and holding guns	Saudi Arabia	https://www.theguardian.com/news/gallery/2021/nov/01/plastic-waste-and-peter-pan-dogs-mondays-best-photos
269	the guardian	images/img_269.jpg	People attend a ceremony honouring the Vodoo spirit of Baron Samedi and Gede at the National Cemetery.	A man holding a bottle of water	Haiti	https://www.theguardian.com/news/gallery/2021/nov/01/plastic-waste-and-peter-pan-dogs-mondays-best-photos
270	the guardian	images/img_270.jpg	A woman kneels at a grave on All Saint’s day. Across the country Hungarians commemorate their deceased by visiting and tending to burial plots.	A person kneeling in a cemetery	Hungary	https://www.theguardian.com/news/gallery/2021/nov/01/plastic-waste-and-peter-pan-dogs-mondays-best-photos
271	the guardian	images/img_271.jpg	Clara Burrel of France reacts during her tennis match against Rebecca Marino and Gabriela Dabrowski of Canada at the Billie Jean King Trophy 2021 Finals.	A woman playing tennis	Czech Republic	https://www.theguardian.com/news/gallery/2021/nov/01/plastic-waste-and-peter-pan-dogs-mondays-best-photos
272	the guardian	images/img_272.jpg	The Duchess of Cambridge laughs as she offers a tub of dead larvae to guests at a reception at the Clydeside Distillery.	A man holding a glass of wine	Scotland	https://www.theguardian.com/news/gallery/2021/nov/01/plastic-waste-and-peter-pan-dogs-mondays-best-photos
273	the guardian	images/img_273.jpg	Pro-choice demonstrators gather outside the US supreme court as the high court hears arguments in two challenges to a Texas law that bans most abortions	A group of people holding signs	USA	https://www.theguardian.com/news/gallery/2021/nov/01/plastic-waste-and-peter-pan-dogs-mondays-best-photos
274	the guardian	images/img_274.jpg	A man embraces two girls as they exit Ben Gurion international airport after Israel opened its borders to individual tourists	A group of people standing in a line at an airport	Israel	https://www.theguardian.com/news/gallery/2021/nov/01/plastic-waste-and-peter-pan-dogs-mondays-best-photos
275	the guardian	images/img_275.jpg	Students arrive to attend their first classes of the new school year, which had been postponed by a month because of Covid-19 precautions. More than 11 million students in Iraq started their classes on Monday morning	A group of people holding balloons	Iraq	https://www.theguardian.com/news/gallery/2021/nov/01/plastic-waste-and-peter-pan-dogs-mondays-best-photos
276	the guardian	images/img_276.jpg	Officials disinfect a tourist’s luggage on the first day of the country’s reopening for foreign visitors, at Suvarnabhumi international airport.	A group of people in clothing walking in a large building	Thailand	https://www.theguardian.com/news/gallery/2021/nov/01/plastic-waste-and-peter-pan-dogs-mondays-best-photos
277	the guardian	images/img_277.jpg	A woman collects plastic materials at a landfill in North Sumatra province.	A person standing in a pile of garbage	Indonesia	https://www.theguardian.com/news/gallery/2021/nov/01/plastic-waste-and-peter-pan-dogs-mondays-best-photos
278	the guardian	images/img_278.jpg	An international traveller is embraced as she arrives at Sydney airport after Covid-related border restrictions eased.	A man and woman hugging	Australia	https://www.theguardian.com/news/gallery/2021/nov/01/plastic-waste-and-peter-pan-dogs-mondays-best-photos
279	the guardian	images/img_279.jpg	Boris Johnson and Joe Biden are seen at Cop26.	Two men in suits	UK	https://www.theguardian.com/news/gallery/2021/nov/01/plastic-waste-and-peter-pan-dogs-mondays-best-photos
280	the guardian	images/img_280.jpg	People dance outside a polling station during the local government elections that will decide the leadership of the cities and municipalities across the country	A group of people in clothing	South Africa	https://www.theguardian.com/news/gallery/2021/nov/01/plastic-waste-and-peter-pan-dogs-mondays-best-photos
281	the guardian	images/img_281.jpg	People take part in the Day of the Dead parade at Zocalo Square	A large building with a large crowd of people in front of it	Mexico	https://www.theguardian.com/news/gallery/2021/nov/01/plastic-waste-and-peter-pan-dogs-mondays-best-photos
282	the guardian	images/img_282.jpg	Supporters and leaders of the mainstream political party National Conference shout slogans as they hold placards during a protest demanding the withdrawal of police reports against students and for the release of three Kashmiri students arrested in Agra, Uttar Pradesh	A group of people holding signs	Indian Kashmir	https://www.theguardian.com/news/gallery/2021/nov/01/plastic-waste-and-peter-pan-dogs-mondays-best-photos
283	the guardian	images/img_283.jpg	Kirsten Moore-Towers and Michael Marinaro of Canada skate during the exhibition gala at Skate Canada International	A man and a woman dancing on a stage	Canada	https://www.theguardian.com/news/gallery/2021/nov/01/plastic-waste-and-peter-pan-dogs-mondays-best-photos
284	the guardian	images/img_284.jpg	People attend the 48th annual Village Halloween parade along 6th Avenue in Manhattan.	A group of people wearing clothing	USA	https://www.theguardian.com/news/gallery/2021/nov/01/plastic-waste-and-peter-pan-dogs-mondays-best-photos
285	the guardian	images/img_285.jpg	A man walks past a liquor store in flames	A man walks past a liquor store in flames	USA	https://www.theguardian.com/us-news/gallery/2020/may/29/minneapolis-protests-escalate-over-george-floyd-killing-in-pictures
286	the guardian	images/img_286.jpg	Protesters set fire to the entrance of a police station.	A man standing in front of a fire	USA	https://www.theguardian.com/us-news/gallery/2020/may/29/minneapolis-protests-escalate-over-george-floyd-killing-in-pictures
287	the guardian	images/img_287.jpg	A person walks past a building covered with graffiti about the death of George Floyd	A man standing in front of a wall with graffiti	USA	https://www.theguardian.com/us-news/gallery/2020/may/29/minneapolis-protests-escalate-over-george-floyd-killing-in-pictures
288	the guardian	images/img_288.jpg	Riot police utilize pepper spray on protesters as demonstrations continue in Minneapolis	A group of people watching a man on a boat	USA	https://www.theguardian.com/us-news/gallery/2020/may/29/minneapolis-protests-escalate-over-george-floyd-killing-in-pictures
289	the guardian	images/img_289.jpg	A protester reacts as she walks through a cloud of teargas	A person standing on a sidewalk	USA	https://www.theguardian.com/us-news/gallery/2020/may/29/minneapolis-protests-escalate-over-george-floyd-killing-in-pictures
290	the guardian	images/img_290.jpg	Protesters watch as police in riot gear walk down a residential street	A police officer standing in front of a building with people in the background	USA	https://www.theguardian.com/us-news/gallery/2020/may/29/minneapolis-protests-escalate-over-george-floyd-killing-in-pictures
291	the guardian	images/img_291.jpg	Two girls walk across a graveyard in Rio de Janeiro, Brazil.	A couple of people in a field	Brazil	https://www.theguardian.com/global-development/gallery/2021/nov/06/nigerian-police-brutality-and-shelling-in-myanmar-human-rights-this-fortnight-in-pictures
292	the guardian	images/img_292.jpg	People gather to chant slogans and wave flags during a protest in Khartoum, Sudan. In late October, Sudan’s military seized power in a coup, arrested leading civilian politicians, including the prime minister, Abdalla Hamdok, and declared a state of emergency.	A group of people holding flags	Sudan	https://www.theguardian.com/global-development/gallery/2021/nov/06/nigerian-police-brutality-and-shelling-in-myanmar-human-rights-this-fortnight-in-pictures
293	the guardian	images/img_293.jpg	Firefighters tackle wildfires on the outskirts of Athens, the Greek capital.	A group of people standing in front of a fire	Greece	https://www.theguardian.com/global-development/gallery/2021/nov/06/nigerian-police-brutality-and-shelling-in-myanmar-human-rights-this-fortnight-in-pictures
294	the guardian	images/img_294.jpg	A tap supplying water to Umoja village. It is usually the job of children to fill the jerry cans.	A man pouring water into a container	Kenya	https://www.theguardian.com/global-development/gallery/2021/nov/05/kenyas-water-crisis-leaves-villagers-at-risk-of-violence-and-disease-in-pictures
295	the guardian	images/img_295.jpg	Children play outside a traditional village house made of wood, earth and dried camel dung	A group of children playing with a tire in a dirt field	Kenya	https://www.theguardian.com/global-development/gallery/2021/nov/05/kenyas-water-crisis-leaves-villagers-at-risk-of-violence-and-disease-in-pictures
296	the guardian	images/img_296.jpg	One of the villagers, Antonella, at home with her children. Outside their homes, women are at risk of attack from men and wild animals as they are forced to travel long distances to find water	A group of people sitting in a room with a fire	Kenya	https://www.theguardian.com/global-development/gallery/2021/nov/05/kenyas-water-crisis-leaves-villagers-at-risk-of-violence-and-disease-in-pictures
297	the guardian	images/img_297.jpg	Women in Ltungai have to fill their 15-litre jerry cans from a hole where the water stagnates between two rocks. The water is not safe to drink and has led to illness	A group of people carrying buckets	Kenya	https://www.theguardian.com/global-development/gallery/2021/nov/05/kenyas-water-crisis-leaves-villagers-at-risk-of-violence-and-disease-in-pictures
298	the guardian	images/img_298.jpg	Ann N’Gichili lives in Ltungai. She is a spokesperson for the women’s community	A person sitting on a chair	Kenya	https://www.theguardian.com/global-development/gallery/2021/nov/05/kenyas-water-crisis-leaves-villagers-at-risk-of-violence-and-disease-in-pictures
299	the guardian	images/img_299.jpg	A young girl picks small edible flowers in Ltungai.	A person in a dress standing in a field of bushes	Kenya	https://www.theguardian.com/global-development/gallery/2021/nov/05/kenyas-water-crisis-leaves-villagers-at-risk-of-violence-and-disease-in-pictures
300	the guardian	images/img_300.jpg	Children in Laresoro, in Samburu county, dig holes in the dried Ewaso Nyiro riverbed, searching for water on their way to school. The water is brown and unsafe to drink. Children often have black stains on their teeth from the water and stomach problems	A group of children playing in the dirt	Kenya	https://www.theguardian.com/global-development/gallery/2021/nov/05/kenyas-water-crisis-leaves-villagers-at-risk-of-violence-and-disease-in-pictures
301	the guardian	images/img_301.jpg	Korbesa village, in neighbouring Isiolo county, is in the middle of a barren desert, with no water, plants or trees	A group of people walking on a beach	Kenya	https://www.theguardian.com/global-development/gallery/2021/nov/05/kenyas-water-crisis-leaves-villagers-at-risk-of-violence-and-disease-in-pictures
302	the guardian	images/img_302.jpg	A small, muddy water point, where animals drink and relieve themselves is where villagers collect water for drinking, cooking and washing	A group of donkeys on a dirt road	Kenya	https://www.theguardian.com/global-development/gallery/2021/nov/05/kenyas-water-crisis-leaves-villagers-at-risk-of-violence-and-disease-in-pictures
303	the guardian	images/img_303.jpg	Large holes have been dug to extract water. The water point is guarded by men because it has attracted people from other villages, which led to clashes	A person in a cave	Kenya	https://www.theguardian.com/global-development/gallery/2021/nov/05/kenyas-water-crisis-leaves-villagers-at-risk-of-violence-and-disease-in-pictures
304	the guardian	images/img_304.jpg	Not far from the dried river, young children now have to walk for hours to find land to graze their cattle	A person holding a gun	Kenya	https://www.theguardian.com/global-development/gallery/2021/nov/05/kenyas-water-crisis-leaves-villagers-at-risk-of-violence-and-disease-in-pictures
305	the guardian	images/img_305.jpg	Farmers have to travel increasingly long distances to find water for their livestock. Women and children left behind are vulnerable to attacks by bandits	A person standing in a muddy area	Kenya	https://www.theguardian.com/global-development/gallery/2021/nov/05/kenyas-water-crisis-leaves-villagers-at-risk-of-violence-and-disease-in-pictures
306	the guardian	images/img_306.jpg	Tuntiak Katan, vice-coordinator of the Indigenous Organizations of the Amazon Basin, speaks during the Action on Forests and Land Use session.	A man wearing a hat.	Scotland	https://www.theguardian.com/environment/gallery/2021/nov/02/cop26-global-leaders-begin-talks-in-pictures
307	the guardian	images/img_307.jpg	During storms, they can’t fish, which means they don’t earn anything.	A group of people on a boat	Cambodia	https://www.theguardian.com/world/gallery/2021/nov/01/children-surviving-the-climate-crisis-in-pictures
308	the guardian	images/img_308.jpg	Zahra, 12, worries about the air quality in her home city, Lahore. ‘It affects my family because pollution can make us sick in our homes.’	A man holding a child	Cambodia	https://www.theguardian.com/world/gallery/2021/nov/01/children-surviving-the-climate-crisis-in-pictures
309	the guardian	images/img_309.jpg	Taliban members inspect a prison cell at Pul-e-Charkhi prison on the outskirts of the city.	A person holding a gun in front of a wall with graffiti	Afghanistan	https://www.theguardian.com/artanddesign/gallery/2021/oct/22/twenty-photographs-of-the-week
310	the guardian	images/img_310.jpg	Medics work in the intensive care unit for Covid-19 patients in the Sklifosovsky emergency hospital.	A group of surgeons performing surgery	Russia	https://www.theguardian.com/artanddesign/gallery/2021/oct/22/twenty-photographs-of-the-week
311	the guardian	images/img_311.jpg	A man films himself in front of burning tyres during a general strike launched by several professional associations and companies to denounce insecurity in the city.	A man kneeling in front of a fire	Haiti	https://www.theguardian.com/artanddesign/gallery/2021/oct/22/twenty-photographs-of-the-week
312	the guardian	images/img_312.jpg	People shelter from volcanic ashes as they watch the Cumbre Vieja volcano erupting on the Canary island.	A couple of people holding an umbrella	Spain	https://www.theguardian.com/artanddesign/gallery/2021/oct/22/twenty-photographs-of-the-week
313	the guardian	images/img_313.jpg	First year students at the University of St Andrews participate in the annual Raisin Monday shaving-foam fight on the lower college lawn.	A person wearing a mask	Scotland	https://www.theguardian.com/artanddesign/gallery/2021/oct/22/twenty-photographs-of-the-week
314	the guardian	images/img_314.jpg	Yawalapiti men dance during the Kuarup, a funeral ritual to honour the memory of Cacique Aritana, a Yawalapiti chief, at the Xingu indigenous park.	A group of people running	Brazil	https://www.theguardian.com/artanddesign/gallery/2021/oct/22/twenty-photographs-of-the-week
315	the guardian	images/img_315.jpg	Migrants rest on the deck of the Sea Watch-3 rescue ship in the Mediterranean.	A group of people in black		https://www.theguardian.com/artanddesign/gallery/2021/oct/22/twenty-photographs-of-the-week
316	the guardian	images/img_316.jpg	People who had been marching on the prime minister’s residence to demand justice for the assassination of Haitian president Jovenel Moise run from teargas fired by police.	A group of people walking	Haiti	https://www.theguardian.com/artanddesign/gallery/2021/oct/22/twenty-photographs-of-the-week
317	the guardian	images/img_317.jpg	Migrants prepare to cross the Channel towards England on an inflatable boat at night near Wimereux.	A group of people on a boat at night	France	https://www.theguardian.com/artanddesign/gallery/2021/oct/22/twenty-photographs-of-the-week
318	the guardian	images/img_318.jpg	The British prime minister, Boris Johnson, and the leader of the Labour party, Keir Starmer, carry flowers to the site where David Amess, a long-serving member of parliament, was stabbed to death in Leigh-on-Sea.	Keir Starmer, Boris Johnson are posing for a picture	UK	https://www.theguardian.com/artanddesign/gallery/2021/oct/22/twenty-photographs-of-the-week
319	the guardian	images/img_319.jpg	Haitian migrants wait to board a boat that will take them to Acandi near the border with Panama, as they prepare to depart.	A group of people sitting on the ground	Colombia	https://www.theguardian.com/artanddesign/gallery/2021/oct/22/twenty-photographs-of-the-week
320	the guardian	images/img_320.jpg	Cruz Jara, a Covid-19 patient, is helped from her bed by a health professional in the intensive care unit of the Virgen de Fatima contingency hospital. Her daughter (foreground) is also infected.	A person in a hospital bed	Peru	https://www.theguardian.com/artanddesign/gallery/2021/oct/22/twenty-photographs-of-the-week
321	the guardian	images/img_321.jpg	Two children look at the Pillar of Shame statue at the Hong Kong University campus.	A couple of people standing next to a tall tower	China	https://www.theguardian.com/artanddesign/gallery/2021/oct/22/twenty-photographs-of-the-week
322	the guardian	images/img_322.jpg	Astronauts at a pre-launch departure ceremony at the Jiuquan satellite launch centre.	A group of people in clothing	China	https://www.theguardian.com/artanddesign/gallery/2021/oct/22/twenty-photographs-of-the-week
323	the guardian	images/img_323.jpg	Dozens of volunteers wearing only white paint pose in the desert in south-eastern Israel for the US photographer Spencer Tunick as part of an art installation that he hopes will raise awareness about preserving the Dead Sea, which is receding by about a metre a year.	A group of people in white robes	Israel	https://www.theguardian.com/artanddesign/gallery/2021/oct/22/twenty-photographs-of-the-week
324	the guardian	images/img_324.jpg	French police officers patrolling the beach between Ambleteuse and Wimereux pass a mangled inflatable boat that migrants had planned to use to cross the Channel towards Britain.	A group of people walking on a beach	France	https://www.theguardian.com/artanddesign/gallery/2021/oct/22/twenty-photographs-of-the-week
325	the guardian	images/img_325.jpg	A man, part of a migrant caravan heading for the US, carries his child in the rain.	A person holding another man	Mexico	https://www.theguardian.com/artanddesign/gallery/2021/oct/29/twenty-photographs-of-the-week
326	the guardian	images/img_326.jpg	Omide Marechal, 61, holds her 26-day-old grandson on a hospital bed at the Centre Hospitalier du Sacre-Coeur. Peterson’s mother died during childbirth. Haiti’s hospitals are at risk of closing owing to a lack of fuel.	A person receiving an acupuncture treatment	Haiti	https://www.theguardian.com/artanddesign/gallery/2021/oct/29/twenty-photographs-of-the-week
327	the guardian	images/img_327.jpg	A boy runs away from men dressed as Kankurang during a ritual procession. The Kankurang rite was recognised in 2005 by Unesco, which proclaimed it a cultural heritage. Despite his fearsome appearance, the Kankurang symbolises the spirit that provides order and justice and is considered a protector against evil.	A person in a garment running down a street	Gambia	https://www.theguardian.com/artanddesign/gallery/2021/oct/29/twenty-photographs-of-the-week
328	the guardian	images/img_328.jpg	Municipal workers hold placards and shout slogans during a protest against the Covid-19 vaccine mandate.	A group of people holding signs and flags	USA	https://www.theguardian.com/artanddesign/gallery/2021/oct/29/twenty-photographs-of-the-week
329	the guardian	images/img_329.jpg	A child plays during a fumigation drive conducted by the municipal corporation as cases of the viral infection dengue surge.	A person standing on a bridge	India	https://www.theguardian.com/artanddesign/gallery/2021/oct/29/twenty-photographs-of-the-week
330	the guardian	images/img_330.jpg	Asho, a little girl betrothed to a 23-year-old man to whose family they were indebted, sits outside a tent at the Shamal Darya camp for internally displaced people.	A child sitting on a rocky area	Afghanistan	https://www.theguardian.com/artanddesign/gallery/2021/oct/29/twenty-photographs-of-the-week
331	the guardian	images/img_331.jpg	A man, part of a migrant caravan, sleeps on a bed of rocks on the banks of the Huixtla River on a trek across southern Mexico towards the US border.	A person lying on rocks	Mexico	https://www.theguardian.com/artanddesign/gallery/2021/oct/29/twenty-photographs-of-the-week
332	the guardian	images/img_332.jpg	The Massini family from Syria are looked after by volunteers from Grupa Granica and volunteers of Medycy na Granicy while awaiting transport in the forest near the eastern Polish town.	A group of people sitting in the woods eating food	Poland	https://www.theguardian.com/artanddesign/gallery/2021/oct/29/twenty-photographs-of-the-week
333	the guardian	images/img_333.jpg	Police advance on a group of protesters on the first day of a nationwide strike over the rise in gas prices and the policies of Ecuador’s president, Guillermo Lasso.	A row of people in military uniforms	Ecuador	https://www.theguardian.com/artanddesign/gallery/2021/oct/29/twenty-photographs-of-the-week
334	the guardian	images/img_334.jpg	The former South African president Jacob Zuma stands in the high court.	A person wearing a mask	South Africa	https://www.theguardian.com/artanddesign/gallery/2021/oct/29/twenty-photographs-of-the-week
335	the guardian	images/img_335.jpg	People watch municipal workers march across Brooklyn Bridge during a protest against the Covid-19 vaccine mandate.	A person taking a picture of a bridge with a flag	USA	https://www.theguardian.com/artanddesign/gallery/2021/oct/29/twenty-photographs-of-the-week
336	the guardian	images/img_336.jpg	Holocaust survivors have their makeup done during an event called Beauty Heroines. Organisers said the makeover event was a gesture toward elderly Holocaust survivors who endured the Nazi genocide of the second world war.	A group of people in a room	Israel	https://www.theguardian.com/artanddesign/gallery/2021/oct/29/twenty-photographs-of-the-week
337	the guardian	images/img_337.jpg	Police officers advance on protesters against the rise in gas prices and the policies of Ecuador’s president, Guillermo Lasso.	A truck on a road with a group of people on it	Ecuador	https://www.theguardian.com/artanddesign/gallery/2021/oct/29/twenty-photographs-of-the-week
338	the guardian	images/img_338.jpg	A girl carries a ghetto blaster among queues of people waiting to buy cheap cooking gas in the Vila Vintém fa	A girl on a scooter	Brazil	https://www.theguardian.com/artanddesign/gallery/2021/oct/29/twenty-photographs-of-the-week
339	the guardian	images/img_339.jpg	Teargas is fired to disperse protesters during demonstrations against a military takeover.	A group of people running from a large explosion	Sudan	https://www.theguardian.com/artanddesign/gallery/2021/oct/29/twenty-photographs-of-the-week
340	the guardian	images/img_340.jpg	A mother shops with her children at the market.	A group of children in a market	Afghanistan	https://www.theguardian.com/artanddesign/gallery/2021/oct/29/twenty-photographs-of-the-week
341	the guardian	images/img_341.jpg	A man works at the Rhone Glacier, which is partially covered with insulating foam to prevent the ice from melting due to global warming. Swiss glaciers lost 1% of their volume in 2021.	A person standing next to a large glacier	Switzerland	https://www.theguardian.com/artanddesign/gallery/2021/oct/29/twenty-photographs-of-the-week
342	the guardian	images/img_342.jpg	Local wrestlers grapple during a bout in the Raja Katra market area of Burrabazar, a neighbourhood in Kolkata	A group of people on a large ramp with a crowd watching	India	https://www.theguardian.com/artanddesign/gallery/2021/oct/26/moments-of-joy-amid-hardship-siena-award-winners-2021-in-pictures
343	the guardian	images/img_343.jpg	Rangers patrol Lake Edward in the Democratic Republic of Congo.	A group of men in a boat	Democratic Republic of Congo	https://www.theguardian.com/artanddesign/gallery/2021/oct/26/moments-of-joy-amid-hardship-siena-award-winners-2021-in-pictures
344	the guardian	images/img_344.jpg	A woman is helped with her dress before her wedding in Stolipinovo, a predominately Romany district in Plovdiv, Bulgaria’s second-largest city.	A person holding a child in a car with a group of people around	Bulgaria	https://www.theguardian.com/artanddesign/gallery/2021/oct/26/moments-of-joy-amid-hardship-siena-award-winners-2021-in-pictures
345	the guardian	images/img_345.jpg	A wild elephant attacks a jeep full of people.	An elephant walking next to a jeep		https://www.theguardian.com/artanddesign/gallery/2021/oct/26/moments-of-joy-amid-hardship-siena-award-winners-2021-in-pictures
346	the guardian	images/img_346.jpg	Staff at the San Carlos de Celanova residence celebrate the 98th birthday of Elena Pérez, two weeks after she overcame coronavirus.	A group of people in surgical scrubs and masks	Spain	https://www.theguardian.com/artanddesign/gallery/2021/oct/26/moments-of-joy-amid-hardship-siena-award-winners-2021-in-pictures
347	the guardian	images/img_347.jpg	Although teenagers’ lives appear completely absorbed by social media and the internet in many parts of the world, in Havana, Cuba, children still enjoy themselves by playing in the open air in their homes’ courtyards	A group of people playing on a swing set	Cuba	https://www.theguardian.com/artanddesign/gallery/2021/oct/26/moments-of-joy-amid-hardship-siena-award-winners-2021-in-pictures
348	the guardian	images/img_348.jpg	This image, taken from the photo story The Anxiety Series, combines art, poetry, and a social message about mental health in a vibrant fusion, drawing inspiration from the author’s personal experiences with anxiety	A group of people in a room		https://www.theguardian.com/artanddesign/gallery/2021/oct/26/moments-of-joy-amid-hardship-siena-award-winners-2021-in-pictures
349	the guardian	images/img_349.jpg	A child jumps on waste products used to make poultry feed, as she plays in a tannery in Hazaribagh, which is part of the old town in Dhaka, Bangladesh	A man jumping over a pile of garbage	Bangladesh	https://www.theguardian.com/artanddesign/gallery/2021/oct/26/moments-of-joy-amid-hardship-siena-award-winners-2021-in-pictures
350	the guardian	images/img_350.jpg	Munzir lost his right leg when a bomb was dropped as he walked through a bazaar in Idlib, Syria. Here he is pictured in Hatay province, Turkey, with his son Mustafa, who was born without lower or upper limbs because of tetra-amelia syndrome, which was caused by the medications his mother, Zeynep, had to take after nerve gas attack during the war.	A man holding a camera and a woman holding a camera	Syria	https://www.theguardian.com/artanddesign/gallery/2021/oct/26/moments-of-joy-amid-hardship-siena-award-winners-2021-in-pictures
351	the guardian	images/img_351.jpg	There were continual eruptions at Mount Bromo for exactly one year from 12 November 2015 to 12 November 2016. The volcano emitted ash that disrupted flights and local tourism. Despite the volcanic activity people who live nearby carry on as usual. Bromo Tengger Semeru national park, East Java	A group of people on horses with a large explosion behind them	Indonesia	https://www.theguardian.com/artanddesign/gallery/2021/oct/26/moments-of-joy-amid-hardship-siena-award-winners-2021-in-pictures
352	the guardian	images/img_352.jpg	Brazilian artist and activist Thiago Mundano sifts ashes collected when he visited scenes of fires in the Amazon forest, the Pantanal, the Cerrado tropical savannah and the Atlantic forest.	A person holding a snake	Brazil	https://www.theguardian.com/global-development/gallery/2021/oct/24/mural-painted-using-ash-marks-brazil-amazon-wildfire-tragedy
353	the guardian	images/img_353.jpg	Supporters of a Shia group allied with Hezbollah fire weapons during armed clashes that erupted during a protest in the southern suburb of Dahiyeh	A group of people around a car	Lebanon	https://www.theguardian.com/news/gallery/2021/oct/14/blackpool-queen-heavy-snake-thursday-best-photos
354	the guardian	images/img_354.jpg	The family of Giulio Regeni, who was found dead on a desert highway in Egypt in 2016, arrive with their lawyer, Alessandra Ballerini, at Rebibbia prison to attend the first hearing of a trial over Regeni’s death.	A group of people walking	Italy	https://www.theguardian.com/news/gallery/2021/oct/14/blackpool-queen-heavy-snake-thursday-best-photos
355	the guardian	images/img_355.jpg	Taliban members drive through the city centre	A group of people in a vehicle	Afghanistan	https://www.theguardian.com/news/gallery/2021/oct/14/blackpool-queen-heavy-snake-thursday-best-photos
356	the guardian	images/img_356.jpg	The Labour leader, Keir Starmer, speaks to the shadow chancellor, Rachel Reeves, as they travel to the city to visit a steel plant	Rachel Reeves and woman on a train	UK	https://www.theguardian.com/news/gallery/2021/oct/14/blackpool-queen-heavy-snake-thursday-best-photos
357	the guardian	images/img_357.jpg	A girl dresses up as the goddess Durga during the Kumari Puja ritual, as part of the Durga Puja festival	A group of people sitting on a couch	India	https://www.theguardian.com/news/gallery/2021/oct/14/blackpool-queen-heavy-snake-thursday-best-photos
358	the guardian	images/img_358.jpg	A waxwork of Queen Elizabeth II is escorted in a horse and carriage along the promenade as it makes its way to Madame Tussauds.	A person in pink jacket	UK	https://www.theguardian.com/news/gallery/2021/oct/14/blackpool-queen-heavy-snake-thursday-best-photos
359	the guardian	images/img_359.jpg	Revellers at Amsterdam musical festival	A group of people posing for a photo	Netherlands	https://www.theguardian.com/news/gallery/2021/oct/14/blackpool-queen-heavy-snake-thursday-best-photos
360	the guardian	images/img_360.jpg	The British singer-director Jeymes Samuel (left) and Jay-Z arrive for a special screening of Netflix’s The Harder They Fall at the Shrine Auditorium	JAY-Z et al. laughing	USA	https://www.theguardian.com/news/gallery/2021/oct/14/blackpool-queen-heavy-snake-thursday-best-photos
361	the guardian	images/img_361.jpg	Jessica Van Ord, a park official, leaves a fissure after she rescued a 12-year-old dog found trapped after five days deep inside the narrow rocky crevice at Minnewaska state park preserve	A person with a dog	USA	https://www.theguardian.com/news/gallery/2021/oct/14/blackpool-queen-heavy-snake-thursday-best-photos
362	the guardian	images/img_362.jpg	Josue Fontalvo, an amateur boxer, trains at a gym in the La Magdalena neighbourhood of Barranquilla.	A man with a face	Colombia	https://www.theguardian.com/news/gallery/2021/oct/14/blackpool-queen-heavy-snake-thursday-best-photos
363	the guardian	images/img_363.jpg	A reptile collector, Jaime Sanchez, holds a seven-year-old green anaconda and one of its 19 snakelets, all of which were born in captivity.	A man holding a trophy	Mexico	https://www.theguardian.com/news/gallery/2021/oct/14/blackpool-queen-heavy-snake-thursday-best-photos
364	the guardian	images/img_364.jpg	Haitian migrants wade across the Rio Grande to return to Ciudad Acuña, Mexico, to avoid deportation back to Haiti.	A girl holding a rope in a river	Haiti	https://www.theguardian.com/artanddesign/gallery/2021/sep/24/twenty-photographs-of-the-week
365	the guardian	images/img_365.jpg	A woman gives bread to young people in need in front of a bakery.	A group of people in a room	Afghanistan	https://www.theguardian.com/artanddesign/gallery/2021/sep/24/twenty-photographs-of-the-week
366	the guardian	images/img_366.jpg	A Syrian student walks to school past damaged buildings in the northern city.	A boy skateboards down a dirt road	Syria	https://www.theguardian.com/artanddesign/gallery/2021/sep/24/twenty-photographs-of-the-week
367	the guardian	images/img_367.jpg	An Afghan woman passes by the former ministry of women’s affairs, which has been replaced by the conservative ministry of vice and virtue responsible for overseeing the implementation of Islamic rules.	A person standing in front of a building with a sign on it	Afghanistan	https://www.theguardian.com/artanddesign/gallery/2021/sep/24/twenty-photographs-of-the-week
368	the guardian	images/img_368.jpg	Placard-bearing protesters march as part of the ‘Fridays for Future’ global protests against climate change.	A group of people holding signs	Poland	https://www.theguardian.com/artanddesign/gallery/2021/sep/24/twenty-photographs-of-the-week
369	the guardian	images/img_369.jpg	A US border patrol agent on horseback tries to stop a Haitian migrant from entering an encampment on the banks of the Rio Grande.	A man and a woman with a horse	USA	https://www.theguardian.com/artanddesign/gallery/2021/sep/24/twenty-photographs-of-the-week
370	the guardian	images/img_370.jpg	Participants take part in the charity Key4Life’s rehabilitation programme working with horses at a residential retreat in Butleigh.	A person riding a horse	UK	https://www.theguardian.com/artanddesign/gallery/2021/sep/24/twenty-photographs-of-the-week
371	the guardian	images/img_371.jpg	Ultra-Orthodox Jewish women adorn 30-day-old Yossef Tabersky, the great-grandchild of the chief rabbi of the Lelov Hassidic dynasty, during the Pidyon Haben ceremony. The Pidyon Haben, or redemption of the firstborn son, is a ceremony going back to the biblical Exodus from Egypt.	A group of people around a cake	Israel	https://www.theguardian.com/artanddesign/gallery/2021/sep/24/twenty-photographs-of-the-week
372	the guardian	images/img_372.jpg	Portraits of participants in the festival of Cure Salee. Thousands of Fulani and Tuareg nomads from several Sahel and Sahara countries took part in the three-day pastoral festival on the outskirts of the old commercial town.	A collage of a man and woman	Niger	https://www.theguardian.com/artanddesign/gallery/2021/sep/24/twenty-photographs-of-the-week
373	the guardian	images/img_373.jpg	Health workers Kamla Devi, 58, and Kanta Devi, 26, trek through the mountains to vaccinate people in remote villages during a vaccination drive near the village of Malana.	A person holding an umbrella	India	https://www.theguardian.com/artanddesign/gallery/2021/sep/24/twenty-photographs-of-the-week
374	the guardian	images/img_374.jpg	An anti-government coca farmer runs away from teargas fired by riot police near the coca market.	A person in a garment walking on a street with a large building in the background	Bolivia	https://www.theguardian.com/artanddesign/gallery/2021/sep/24/twenty-photographs-of-the-week
375	the guardian	images/img_375.jpg	Drivers and passengers stuck in a traffic jam look at Taliban fighters in the back of a pickup truck.	A group of people in a yellow bus	Afghanistan	https://www.theguardian.com/artanddesign/gallery/2021/sep/24/twenty-photographs-of-the-week
376	the guardian	images/img_376.jpg	Youths perform wheelies on their bikes during an exhibition in the Petare neighbourhood.	A large crowd of people at a bike race	Venezuela	https://www.theguardian.com/artanddesign/gallery/2021/sep/24/twenty-photographs-of-the-week
377	the guardian	images/img_377.jpg	Sierra Cobras fire crew member Gustavo Cisneros keeps an eye on a hillside as flames roll into the forest.	A man walking on a dirt path with trees and a blue sky	USA	https://www.theguardian.com/artanddesign/gallery/2021/sep/24/twenty-photographs-of-the-week
378	the guardian	images/img_378.jpg	A cosplayer dressed as Swamp Thing poses next to a food cart outside New York Comic Con	A person standing next to a tree with a large umbrella	USA	https://www.theguardian.com/news/gallery/2021/oct/10/animal-blessings-smoke-bubbles-and-billie-eilish-the-weekends-best-photos
379	the guardian	images/img_379.jpg	A woman waits outside a polling station during the country’s early parliamentary elections	A person looking at a painting	Iraq	https://www.theguardian.com/news/gallery/2021/oct/10/animal-blessings-smoke-bubbles-and-billie-eilish-the-weekends-best-photos
380	the guardian	images/img_380.jpg	Students braid wigs at a county training school in China’s Xinjiang region.	A group of people wearing masks	China	https://www.theguardian.com/news/gallery/2021/oct/10/animal-blessings-smoke-bubbles-and-billie-eilish-the-weekends-best-photos
381	the guardian	images/img_381.jpg	Airport staff check a carnival-ready traveller in for a flight to Punta Cana, Dominican Republic, after a ban on direct flights was lifted	A man in a garment with a woman and a man	Russia	https://www.theguardian.com/news/gallery/2021/oct/10/animal-blessings-smoke-bubbles-and-billie-eilish-the-weekends-best-photos
382	the guardian	images/img_382.jpg	A cutout of Pope Francis is displayed on a float for Father Tolton Catholic high school during the Missouri Homecoming parade	Pope Francis in a white robe	USA	https://www.theguardian.com/news/gallery/2021/oct/10/animal-blessings-smoke-bubbles-and-billie-eilish-the-weekends-best-photos
383	the guardian	images/img_383.jpg	Wilder gets knocked down by Fury, who went on to win the fight	Óscar Valdez kicking another man in the face with a crowd watching	USA	https://www.theguardian.com/news/gallery/2021/oct/10/animal-blessings-smoke-bubbles-and-billie-eilish-the-weekends-best-photos
384	the guardian	images/img_384.jpg	People wait for their pets to be blessed by a priest during an animal blessing ceremony at St John the Evangelist Church	A group of people in clothing	India	https://www.theguardian.com/news/gallery/2021/oct/10/animal-blessings-smoke-bubbles-and-billie-eilish-the-weekends-best-photos
385	the guardian	images/img_385.jpg	Members of the Feminist Liberation Front give a three-fingered salute during a ‘car mob’ rally promoting gender equality and LGBTQ rights	A group of people on a roller coaster	Thailand	https://www.theguardian.com/news/gallery/2021/oct/10/animal-blessings-smoke-bubbles-and-billie-eilish-the-weekends-best-photos
386	the guardian	images/img_386.jpg	A woman walks past demonstrators in support of Haitian asylum seekers in El Paso, Texas.	A man in a hat talking to a woman	USA	https://www.theguardian.com/global-development/gallery/2021/oct/09/turkeys-border-wall-and-deported-haitians-human-rights-this-fortnight-in-pictures
387	the guardian	images/img_387.jpg	Activists march in Los Angeles about the human rights crisis in Afghanistan.	Text	USA	https://www.theguardian.com/global-development/gallery/2021/oct/09/turkeys-border-wall-and-deported-haitians-human-rights-this-fortnight-in-pictures
388	the guardian	images/img_388.jpg	Mohib Ullah, a leading advocate for the Rohingya, a minority that has long been persecuted in Myanmar, has been shot dead in the Cox’s Bazar refugee camp where he lived, in Bangladesh	A man with a beard	Bangladesh	https://www.theguardian.com/global-development/gallery/2021/oct/09/turkeys-border-wall-and-deported-haitians-human-rights-this-fortnight-in-pictures
389	the guardian	images/img_389.jpg	Members of a team who search for and identify missing persons work at the site of a mass grave in Tarhuna, Libya.	A group of people standing in a hole in the ground	Libya	https://www.theguardian.com/global-development/gallery/2021/oct/09/turkeys-border-wall-and-deported-haitians-human-rights-this-fortnight-in-pictures
390	the guardian	images/img_390.jpg	A woman is arrested during a protest against police brutality and harassment in Nairobi, Kenya.	A man and a woman in military uniforms with a man in a mask	Kenya	https://www.theguardian.com/global-development/gallery/2021/oct/09/turkeys-border-wall-and-deported-haitians-human-rights-this-fortnight-in-pictures
391	the guardian	images/img_391.jpg	Nicaraguan political refugees receive food from human rights organisations after fleeing to Costa Rica.	A young boy eating a cake	Costa Rica	https://www.theguardian.com/global-development/gallery/2021/oct/09/turkeys-border-wall-and-deported-haitians-human-rights-this-fortnight-in-pictures
392	the guardian	images/img_392.jpg	A woman takes part in a climate crisis protest in Turin, Italy.	A woman holding a sign	Italy	https://www.theguardian.com/global-development/gallery/2021/oct/09/turkeys-border-wall-and-deported-haitians-human-rights-this-fortnight-in-pictures
393	the guardian	images/img_393.jpg	Students training kalaripayattu, at the family-run Kadathanadan Kalari Sangam school in the town of Vatakara in Kerala, from where the practice originates.	A group of people in a wrestling ring	India	https://www.theguardian.com/artanddesign/gallery/2021/oct/11/the-grandmother-reviving-indias-oldest-martial-art-in-pictures
394	the guardian	images/img_394.jpg	Meenakshi Amma showing a dagger, one of the weapons used in kalari, to her students	A group of people in a room	India	https://www.theguardian.com/artanddesign/gallery/2021/oct/11/the-grandmother-reviving-indias-oldest-martial-art-in-pictures
395	the guardian	images/img_395.jpg	Sajeev Kumar trains his students in the use of shields. Kalari uses many weapons that were common on ancient Indian battlefields	A woman holding a gun and a man in a mask	India	https://www.theguardian.com/artanddesign/gallery/2021/oct/11/the-grandmother-reviving-indias-oldest-martial-art-in-pictures
396	the guardian	images/img_396.jpg	Meenakshi Amma faces her son Sajeev Kumar, 60, using a two-handled bamboo stick	A group of people in a room	India	https://www.theguardian.com/artanddesign/gallery/2021/oct/11/the-grandmother-reviving-indias-oldest-martial-art-in-pictures
397	the guardian	images/img_397.jpg	Students face each other under Kumar’s instruction	A group of men fighting in a wrestling ring	India	https://www.theguardian.com/artanddesign/gallery/2021/oct/11/the-grandmother-reviving-indias-oldest-martial-art-in-pictures
398	the guardian	images/img_398.jpg	Students face each other in Kalari combat training.	A group of people playing drums	India	https://www.theguardian.com/artanddesign/gallery/2021/oct/11/the-grandmother-reviving-indias-oldest-martial-art-in-pictures
399	the guardian	images/img_399.jpg	Meenakshi Amma with the school’s collection of weapons	A person standing next to a statue	India	https://www.theguardian.com/artanddesign/gallery/2021/oct/11/the-grandmother-reviving-indias-oldest-martial-art-in-pictures
400	the guardian	images/img_400.jpg	Meenakshi Amma standing next to a practitioner giving an Ayurvedic massage	A group of people sitting in a room	India	https://www.theguardian.com/artanddesign/gallery/2021/oct/11/the-grandmother-reviving-indias-oldest-martial-art-in-pictures
401	the guardian	images/img_401.jpg	People gather at the Yazidi Temple of Lalish, the holiest temple of the faith, in the Lalish valley near the Iraqi Kurdish city of Dohuk, during Autumn Assembly celebrations	A group of people walking on a street	Kurdistan	https://www.theguardian.com/world/gallery/2021/oct/11/yazidis-visit-holiest-temple-during-autumn-assembly-in-pictures
402	the guardian	images/img_402.jpg	Yazidi women stand at the Temple of Lalish	A group of women wearing headscarves and holding a baby	Kurdistan	https://www.theguardian.com/world/gallery/2021/oct/11/yazidis-visit-holiest-temple-during-autumn-assembly-in-pictures
403	the guardian	images/img_403.jpg	Children stand behind the fence of a window at the Temple of Lalish	A group of children in a room	Kurdistan	https://www.theguardian.com/world/gallery/2021/oct/11/yazidis-visit-holiest-temple-during-autumn-assembly-in-pictures
404	the guardian	images/img_404.jpg	Yazidi women pray by layers of knotted prayer cloths at the temple	A person in a white dress	Kurdistan	https://www.theguardian.com/world/gallery/2021/oct/11/yazidis-visit-holiest-temple-during-autumn-assembly-in-pictures
405	the guardian	images/img_405.jpg	Worshippers walk around a dome structure at the temple	A group of women wearing white robes	Kurdistan	https://www.theguardian.com/world/gallery/2021/oct/11/yazidis-visit-holiest-temple-during-autumn-assembly-in-pictures
406	the guardian	images/img_406.jpg	A Yazidi woman knots together layers of prayer cloths	A man in a garment with a woman in a dress	Kurdistan	https://www.theguardian.com/world/gallery/2021/oct/11/yazidis-visit-holiest-temple-during-autumn-assembly-in-pictures
407	the guardian	images/img_407.jpg	Yazidi youths walk past layers of knotted prayer cloths	A group of people walking	Kurdistan	https://www.theguardian.com/world/gallery/2021/oct/11/yazidis-visit-holiest-temple-during-autumn-assembly-in-pictures
408	the guardian	images/img_408.jpg	Yazidi female worshippers walk inside the temple	A group of people in a cave	Kurdistan	https://www.theguardian.com/world/gallery/2021/oct/11/yazidis-visit-holiest-temple-during-autumn-assembly-in-pictures
409	the guardian	images/img_409.jpg	An elderly Yazidi woman sits next to a small tower	A person sitting on a stone structure	Kurdistan	https://www.theguardian.com/world/gallery/2021/oct/11/yazidis-visit-holiest-temple-during-autumn-assembly-in-pictures
410	the guardian	images/img_410.jpg	A male worshipper kisses a doorway at the temple	A man sitting in a cave	Kurdistan	https://www.theguardian.com/world/gallery/2021/oct/11/yazidis-visit-holiest-temple-during-autumn-assembly-in-pictures
411	the guardian	images/img_411.jpg	A woman exits through a temple doorway	A person wearing a white robe and head covering standing in front of a stone wall	Kurdistan	https://www.theguardian.com/world/gallery/2021/oct/11/yazidis-visit-holiest-temple-during-autumn-assembly-in-pictures
412	the guardian	images/img_412.jpg	A man with his snake	A man sitting on the ground holding a sword	Kurdistan	https://www.theguardian.com/world/gallery/2021/oct/11/yazidis-visit-holiest-temple-during-autumn-assembly-in-pictures
413	the guardian	images/img_413.jpg	Yazidi women wearing traditional clothing stand in a courtyard at the temple	A group of women wearing white robes and black hats	Kurdistan	https://www.theguardian.com/world/gallery/2021/oct/11/yazidis-visit-holiest-temple-during-autumn-assembly-in-pictures
414	the guardian	images/img_414.jpg	A female worshipper kisses a temple doorway	A group of people in white robes standing in a doorway	Kurdistan	https://www.theguardian.com/world/gallery/2021/oct/11/yazidis-visit-holiest-temple-during-autumn-assembly-in-pictures
415	the guardian	images/img_415.jpg	Members of the Yazidi religious community share a meal together as they visit the temple	A group of people sitting on a table with food	Kurdistan	https://www.theguardian.com/world/gallery/2021/oct/11/yazidis-visit-holiest-temple-during-autumn-assembly-in-pictures
416	the guardian	images/img_416.jpg	People walk towards a temple	A group of people standing on a stone path with a building on the side	Kurdistan	https://www.theguardian.com/world/gallery/2021/oct/11/yazidis-visit-holiest-temple-during-autumn-assembly-in-pictures
417	the guardian	images/img_417.jpg	A man splashes himself with water on the shore of a lake during Irreechaa celebrations, the Oromo people’s thanksgiving holiday	A man kneeling in water	Ethiopia	https://www.theguardian.com/news/gallery/2021/oct/03/london-marathon-and-pet-blessings-the-weekends-best-photos
418	the guardian	images/img_418.jpg	Runners pass the one-mile mark in the 2021 Virgin Money London Marathon	A crowd of people in a stadium	UK	https://www.theguardian.com/news/gallery/2021/oct/03/london-marathon-and-pet-blessings-the-weekends-best-photos
419	the guardian	images/img_419.jpg	A priest sprinkles holy water as dogs look out from the car window at a drive-through pet blessing	A dog in a car	Philippines	https://www.theguardian.com/news/gallery/2021/oct/03/london-marathon-and-pet-blessings-the-weekends-best-photos
420	the guardian	images/img_420.jpg	The Arc de Triomphe wrapped in silver-blue fabric as designed by the late artist Christo	A large building with lights on at night	France	https://www.theguardian.com/news/gallery/2021/oct/03/london-marathon-and-pet-blessings-the-weekends-best-photos
421	the guardian	images/img_421.jpg	A woman wrapped in a Brazilian national flag chants slogans during a protest against President Jair Bolsonaro’s handling of the Covid pandemic	A man holding a flag and a woman holding a flag	Brazil	https://www.theguardian.com/news/gallery/2021/oct/03/london-marathon-and-pet-blessings-the-weekends-best-photos
422	the guardian	images/img_422.jpg	Pigeons fly over the Mahatma Gandhi statue at the seat of the state legislature of Karnataka	A statue of a man with a bird flying in the sky	India	https://www.theguardian.com/news/gallery/2021/oct/03/london-marathon-and-pet-blessings-the-weekends-best-photos
423	the guardian	images/img_423.jpg	A family at a stall in a market where people leaving the country sell their home appliances and other belongings	A group of people standing outside	Afghanistan	https://www.theguardian.com/news/gallery/2021/oct/03/london-marathon-and-pet-blessings-the-weekends-best-photos
424	the guardian	images/img_424.jpg	A woman receives a Covid vaccine dose at a slum	A person holding a microphone	India	https://www.theguardian.com/news/gallery/2021/oct/03/london-marathon-and-pet-blessings-the-weekends-best-photos
425	the guardian	images/img_425.jpg	Boris Johnson and Priti Patel try baking during a visit to HideOut Youth Zone	Boris Johnson, Priti Patel et al. standing around a table with food and drinks	UK	https://www.theguardian.com/news/gallery/2021/oct/03/london-marathon-and-pet-blessings-the-weekends-best-photos
426	the guardian	images/img_426.jpg	Protesters hold signs in front of the supreme court during the Women’s March and Rally for Abortion Justice	A man holding a sign in front of a building	USA	https://www.theguardian.com/news/gallery/2021/oct/03/london-marathon-and-pet-blessings-the-weekends-best-photos
427	the guardian	images/img_427.jpg	Cadets attend an initiation ceremony at the Nakhimov naval school	A group of men wearing black hats	Russia	https://www.theguardian.com/news/gallery/2021/oct/03/london-marathon-and-pet-blessings-the-weekends-best-photos
428	the guardian	images/img_428.jpg	Italy’s Sonny Colbrelli celebrates winning the 118th edition of the 260km Paris-Roubaix cycle race which has returned after a two year abscence.	A person lying on the grass with a bicycle on the back	France	https://www.theguardian.com/news/gallery/2021/oct/03/london-marathon-and-pet-blessings-the-weekends-best-photos
429	the guardian	images/img_429.jpg	Kabul, 2003. Afghan boys walk along a path while International Security Assistance Force troops guard the perimeter of a school in Shakadara province.	A group of people walking towards a military vehicle	Afghanistan	https://www.theguardian.com/culture/gallery/2021/sep/15/photographic-print-sale-to-raise-funds-for-afghans-female-journalists
430	the guardian	images/img_430.jpg	Farmers harvest wheat outside Kabul.	A person in a field	Afghanistan	https://www.theguardian.com/culture/gallery/2021/sep/15/photographic-print-sale-to-raise-funds-for-afghans-female-journalists
431	the guardian	images/img_431.jpg	Kabul, 2005. An Afghan boy pretends to be a burqa-covered woman, wrapping a piece of discarded mosquito netting across his face, as his friend pretends to kiss him and a man conducts his evening prayers behind them.	A person holding a baby	Afghanistan	https://www.theguardian.com/culture/gallery/2021/sep/15/photographic-print-sale-to-raise-funds-for-afghans-female-journalists
432	the guardian	images/img_432.jpg	Kabul, 2009. An elderly Afghan roadside banana vendor waits for customers.	A person sitting at a table with a fire in a cart	Afghanistan	https://www.theguardian.com/culture/gallery/2021/sep/15/photographic-print-sale-to-raise-funds-for-afghans-female-journalists
433	the guardian	images/img_433.jpg	Kabul, 2009. Afghan women clad in burqas carry secondhand clothes to wash before trying to sell them.	A couple of people wearing blue and yellow raincoats	Afghanistan	https://www.theguardian.com/culture/gallery/2021/sep/15/photographic-print-sale-to-raise-funds-for-afghans-female-journalists
434	the guardian	images/img_434.jpg	Badakhshan province, 2004. Local girls in the remote village of Ghumaipayan Mahnow watch UN workers delivering ballot papers.	A group of people posing for a photo	Afghanistan	https://www.theguardian.com/culture/gallery/2021/sep/15/photographic-print-sale-to-raise-funds-for-afghans-female-journalists
435	the guardian	images/img_435.jpg	Kabul, 2003. Friends play on a homemade swing during the festival of Eid.	A man holding a woman on a rope	Afghanistan	https://www.theguardian.com/culture/gallery/2021/sep/15/photographic-print-sale-to-raise-funds-for-afghans-female-journalists
436	the guardian	images/img_436.jpg	Kabul, 2002. A burqa-clad woman accepts money from a passerby as she stands next to the grave of a relative at the Tamim Ansar cemetery in the outskirts of Kabul.	A person holding a bucket of water next to a person holding a bucket	Afghanistan	https://www.theguardian.com/culture/gallery/2021/sep/15/photographic-print-sale-to-raise-funds-for-afghans-female-journalists
437	the guardian	images/img_437.jpg	Kabul, 2006. An Afghan family sits on the mountain side as thousands of people gathered to look down on the Sakhi shrine, where a ceremony celebrating the New Year took place.	A person sitting on a rock with a large crowd of people below	Afghanistan	https://www.theguardian.com/culture/gallery/2021/sep/15/photographic-print-sale-to-raise-funds-for-afghans-female-journalists
438	the guardian	images/img_438.jpg	Kabul, 2004. An unidentified girl looks out from the mesh window of her classroom at the special school for Out of School Girls in Kabul, where girls denied an education by the Taliban were prepared to return to regular classes.	A man wearing a head scarf	Afghanistan	https://www.theguardian.com/culture/gallery/2021/sep/15/photographic-print-sale-to-raise-funds-for-afghans-female-journalists
439	the guardian	images/img_439.jpg	Abissa, a very ancient ceremony, is simultaneously a religious ritual, a political-social tribune and a catharsis that marks the beginning of the new year in the N’zima calendar.	A person holding a plant	Ivory Coast	https://www.theguardian.com/artanddesign/gallery/2021/nov/17/a-deep-spiritual-connection-ancient-families-of-ivory-coast-in-pictures-nuits-balneaires
440	the guardian	images/img_440.jpg	Balne?aires’s figures bear appendages and symbols which serve as a visual representation of their cultural customs, emphasising the sense of community and cooperation of these seven families.	A group of people in clothing sitting on the grass	Ivory Coast	https://www.theguardian.com/artanddesign/gallery/2021/nov/17/a-deep-spiritual-connection-ancient-families-of-ivory-coast-in-pictures-nuits-balneaires
441	the guardian	images/img_441.jpg	The Adahonlin family has the palm seed and the parrot as symbols. Outstanding farmers and educators, they believed that the successful education of a child depended on his good nutrition. For them, the palm seed represents maturity, peace and bonding, while the parrot plays a saving role.	A group of people in yellow robes standing in a tree	Ivory Coast	https://www.theguardian.com/artanddesign/gallery/2021/nov/17/a-deep-spiritual-connection-ancient-families-of-ivory-coast-in-pictures-nuits-balneaires
442	the guardian	images/img_442.jpg	The symbols carried by the families are organised to complement each other to aid the harmony and survival of the whole community.	A couple of people in garment	Ivory Coast	https://www.theguardian.com/artanddesign/gallery/2021/nov/17/a-deep-spiritual-connection-ancient-families-of-ivory-coast-in-pictures-nuits-balneaires
443	the guardian	images/img_443.jpg	The symbols of the Alonhomba family of farmers and travellers are raa and calabash, representing self-domination, courage and tenacity.	A person holding a large egg	Ivory Coast	https://www.theguardian.com/artanddesign/gallery/2021/nov/17/a-deep-spiritual-connection-ancient-families-of-ivory-coast-in-pictures-nuits-balneaires
444	the guardian	images/img_444.jpg	The symbol of the N’vavile? family is corn but they are also famous for having discovered abissa.	A person holding a bunch of corn	Ivory Coast	https://www.theguardian.com/artanddesign/gallery/2021/nov/17/a-deep-spiritual-connection-ancient-families-of-ivory-coast-in-pictures-nuits-balneaires
445	the guardian	images/img_445.jpg	This photographic series proposes a dialogue on the importance of the values of unity, solidarity and sharing in a country that is slowly recovering from the wounds inherited from decades of political instability.	A group of people in a room	Ivory Coast	https://www.theguardian.com/artanddesign/gallery/2021/nov/17/a-deep-spiritual-connection-ancient-families-of-ivory-coast-in-pictures-nuits-balneaires
446	the guardian	images/img_446.jpg	This series, whose title translates as ‘come look at me’, represents the traditional ceremonial wear of the Yoruba, Igbo and Hausa-Fulani tribes. However, rather than treating these as past traditions, artist Lakin Ogunbanwo mimics the pageantry of weddings in present-day Nigeria. The brides are captured in singular portraits, away from the fuss of weddings, and are styled like the goddesses, que…	A green light bulb	Nigeria	https://www.theguardian.com/culture/gallery/2021/nov/18/unforgotten-vogue-photo-festival-in-pictures
447	the guardian	images/img_447.jpg	South African photographer Trevor Stuurman creates portraits inspired by ancient north African queens including Nefertiti of Egypt and Kandake Amanirenas of Kush (now Sudan)	A person wearing a crown	South Africa	https://www.theguardian.com/culture/gallery/2021/nov/18/unforgotten-vogue-photo-festival-in-pictures
448	the guardian	images/img_448.jpg	Nichelle, who presents as male, is a bodybuilder.	A man posing for a picture	USA	https://www.theguardian.com/culture/gallery/2021/nov/18/unforgotten-vogue-photo-festival-in-pictures
449	the guardian	images/img_449.jpg	Lalhande, 21, with his cigar, in front of a photo studio in Brazzaville	A man and woman standing in front of a green wall with a robot	Democratic Republic of Congo	https://www.theguardian.com/culture/gallery/2021/nov/18/unforgotten-vogue-photo-festival-in-pictures
450	the guardian	images/img_450.jpg	Journalists Neamat Naqdi and Taqi Daryabi show their wounds in their newspaper office after being beaten and detained for hours by Taliban fighters for covering a protest in Kabul.	A man flexing his muscles	Afghanistan	http://www.theguardian.com/artanddesign/gallery/2021/sep/10/twenty-photographs-of-the-week
451	the guardian	images/img_451.jpg	Afghan women and a girl shop for dresses at a local market in Kabul.	A group of people in a street	Afghanistan	http://www.theguardian.com/artanddesign/gallery/2021/sep/10/twenty-photographs-of-the-week
452	the guardian	images/img_452.jpg	A man who scavenges recyclable materials for a living walks past Marabou storks feeding on a mountain of rubbish amid smoke from burning trash at Dandora, the largest dump in the capital, Nairobi.	A person standing on a rocky beach with many birds	Kenya	http://www.theguardian.com/artanddesign/gallery/2021/sep/10/twenty-photographs-of-the-week
453	the guardian	images/img_453.jpg	Palestinian demonstrators burn tyres during confrontations with Israeli security forces following a rally in support of Palestinian prisoners held in Israeli jails.	A group of people on a stage	West Bank	http://www.theguardian.com/artanddesign/gallery/2021/sep/10/twenty-photographs-of-the-week
454	the guardian	images/img_454.jpg	A person watches the Tribute In Light shine into the sky from Lower Manhattan during a test before the 20th anniversary of the September 11 terrorist attacks.	A city skyline at night	USA	http://www.theguardian.com/artanddesign/gallery/2021/sep/10/twenty-photographs-of-the-week
455	the guardian	images/img_455.jpg	Aiden Locobon and Rogelio Paredes look through the remnants of their family’s home destroyed by Hurricane Ida.	A couple of men standing on a destroyed building	USA	http://www.theguardian.com/artanddesign/gallery/2021/sep/10/twenty-photographs-of-the-week
456	the guardian	images/img_456.jpg	A parade of ‘paramilitary and public security forces’ in a celebration of the 73rd founding anniversary of North Korea at Kim Il-sung Square in Pyongyang.	A group of people in orange robes	North Korea	http://www.theguardian.com/artanddesign/gallery/2021/sep/10/twenty-photographs-of-the-week
457	the guardian	images/img_457.jpg	A musician plays trombone near the statue of Robert E Lee on Monument Avenue in Richmond before its removal.	A statue of a person riding a horse	USA	http://www.theguardian.com/artanddesign/gallery/2021/sep/10/twenty-photographs-of-the-week
458	the guardian	images/img_458.jpg	Migrants, who are part of a caravan heading north, stop to rest at the church San Francisco de Asis in Huixtla.	A group of people sitting on the ground	Mexico	http://www.theguardian.com/artanddesign/gallery/2021/sep/10/twenty-photographs-of-the-week
459	the guardian	images/img_459.jpg	Emma Raducanu, of Great Britain, reacts during her victory against Greece’s Maria Sakkari in the semi-finals of the US Open.	A woman holding a tennis racket	USA	http://www.theguardian.com/artanddesign/gallery/2021/sep/10/twenty-photographs-of-the-week
460	the guardian	images/img_460.jpg	A boy sits inside his mother’s plastic raincoat as they wait to cross at a traffic light during a rainstorm in Beijing.	A person holding a statue	China	http://www.theguardian.com/artanddesign/gallery/2021/sep/10/twenty-photographs-of-the-week
461	the guardian	images/img_461.jpg	Healthcare workers visit houses to conduct swab tests on residents exposed to Covid-19 patients in the mountainous village of Basca.	A few people in blue raincoats walking down a dirt path	Philippines	http://www.theguardian.com/artanddesign/gallery/2021/sep/10/twenty-photographs-of-the-week
462	the guardian	images/img_462.jpg	People are brought ashore from a lifeboat at Dungeness in Kent. Hundreds of refugees and migrants crossed the Channel this week after the weather improved.	A group of people on a beach	UK	http://www.theguardian.com/artanddesign/gallery/2021/sep/10/twenty-photographs-of-the-week
463	the guardian	images/img_463.jpg	Taliban fighters sit next to street vendors at a local market in Kabul.	A group of men sitting on a bench	Afghanistan	http://www.theguardian.com/artanddesign/gallery/2021/sep/10/twenty-photographs-of-the-week
464	the guardian	images/img_464.jpg	Two young women with assault rifles and civilian clothes await their orders for deployment to the frontline	A group of people in military uniforms	Ethiopia	https://www.theguardian.com/global-development/gallery/2021/sep/13/retaking-mekelle-the-fight-for-tigray-in-pictures
465	the guardian	images/img_465.jpg	On Mekelle’s outskirts, Tigrayan militiamen, many of whom are underage boys and girls, prepare to be deployed on active service	A group of people in garment	Ethiopia	https://www.theguardian.com/global-development/gallery/2021/sep/13/retaking-mekelle-the-fight-for-tigray-in-pictures
466	the guardian	images/img_466.jpg	The Ethiopian PoWs are marched past jeering crowds on their way to prison in Mekelle	A group of people in military uniforms	Ethiopia	https://www.theguardian.com/global-development/gallery/2021/sep/13/retaking-mekelle-the-fight-for-tigray-in-pictures
467	the guardian	images/img_467.jpg	Captured Ethiopian soldiers are taken through the city to prison by lorry, under the watchful eye of armed guards	A truck with people on it	Ethiopia	https://www.theguardian.com/global-development/gallery/2021/sep/13/retaking-mekelle-the-fight-for-tigray-in-pictures
468	the guardian	images/img_468.jpg	More than 6,000 Ethiopian prisoners of war, captured during the last days of the struggle for Mekelle, are marched to the prison between lines of local residents on 2 July	A crowd of people on the street	Ethiopia	https://www.theguardian.com/global-development/gallery/2021/sep/13/retaking-mekelle-the-fight-for-tigray-in-pictures
469	the guardian	images/img_469.jpg	Local youths celebrate in Mekelle to welcome the liberating Tigray Defence Forces	A group of people on a car	Ethiopia	https://www.theguardian.com/global-development/gallery/2021/sep/13/retaking-mekelle-the-fight-for-tigray-in-pictures
470	the guardian	images/img_470.jpg	Exhausted Tigrayan soldiers in the centre of Mekelle watch a local woman appearing to give thanks for divine intervention	A group of people in clothing	Ethiopia	https://www.theguardian.com/global-development/gallery/2021/sep/13/retaking-mekelle-the-fight-for-tigray-in-pictures
471	the guardian	images/img_471.jpg	Residents of Mekelle welcome Tigrayan fighters on 29 June, the day after the Ethiopian army suddenly evacuated the regional capital	A group of people holding flags	Ethiopia	https://www.theguardian.com/global-development/gallery/2021/sep/13/retaking-mekelle-the-fight-for-tigray-in-pictures
472	the guardian	images/img_472.jpg	On 29 June, and during the following days, Ayder hospital was flooded with wounded Tigrayan militiamen, who had entered the city that morning	A group of people in a room	Ethiopia	https://www.theguardian.com/global-development/gallery/2021/sep/13/retaking-mekelle-the-fight-for-tigray-in-pictures
473	the guardian	images/img_473.jpg	Genet Tsegay with her mother, Tsigabu Gebreterisae, in the recovery unit of Ayder hospital. Genet’s brother was killed and she lost her right arm in the Ethiopian forces’ airstrike on Togoga	Winona LaDuke holding a baby	Ethiopia	https://www.theguardian.com/global-development/gallery/2021/sep/13/retaking-mekelle-the-fight-for-tigray-in-pictures
474	the guardian	images/img_474.jpg	Casualties are assessed at Ayder hospital. In the background, doctors treat Genet Tsegay, 12, who had her right arm severely damaged by shrapnel, while her mother, Tsigabu Gebreterisae, 45, is overcome with emotion.	A woman in a hospital bed	Ethiopia	https://www.theguardian.com/global-development/gallery/2021/sep/13/retaking-mekelle-the-fight-for-tigray-in-pictures
475	the guardian	images/img_475.jpg	Staff at Mekelle’s Ayder hospital look on as the casualties arrive from the Togoga airstrike	Staff at Mekelle’s Ayder hospital look on as the casualties arrive from the Togoga airstrike	Ethiopia	https://www.theguardian.com/global-development/gallery/2021/sep/13/retaking-mekelle-the-fight-for-tigray-in-pictures
476	the guardian	images/img_476.jpg	Casualties from the Ethiopian airstrike on Togoga were finally allowed out of the town to be treated by medics in Mekelle	A man in a bathtub being washed by a man	Ethiopia	https://www.theguardian.com/global-development/gallery/2021/sep/13/retaking-mekelle-the-fight-for-tigray-in-pictures
477	the guardian	images/img_477.jpg	On 23 June the Ayder hospital in Mekelle, one of the three still operational in Tigray, was suddenly flooded with wounded civilians after the Ethiopian airstrike on Togoga	A group of people in a car	Ethiopia	https://www.theguardian.com/global-development/gallery/2021/sep/13/retaking-mekelle-the-fight-for-tigray-in-pictures
478	the guardian	images/img_478.jpg	About 8,500 people of the millions displaced by the war have sought shelter in Hadnet secondary school in Mekelle.	A person and a child sitting at a table outside	Ethiopia	https://www.theguardian.com/global-development/gallery/2021/sep/13/retaking-mekelle-the-fight-for-tigray-in-pictures
479	the guardian	images/img_479.jpg	People collect cereals and cooking oil at a food aid distribution centre in Mekelle.	A person in a turban dancing with a group of women	Ethiopia	https://www.theguardian.com/global-development/gallery/2021/sep/13/retaking-mekelle-the-fight-for-tigray-in-pictures
480	the guardian	images/img_480.jpg	The village of Melazat bears the signs of the Ethiopian army’s sudden retreat from Mekelle, 15 miles to the east, on 28 June, as Tigrayan forces were fighting their way into the regional capital	A boy running in front of a military truck	Ethiopia	https://www.theguardian.com/global-development/gallery/2021/sep/13/retaking-mekelle-the-fight-for-tigray-in-pictures
481	the guardian	images/img_481.jpg	The market at Togoga (or Togogwa), a small town of 1,000 people 20 miles (35km) from Mekelle, was hit on 22 June in an airstrike by the Ethiopian air force.	A person standing in a dirty area	Ethiopia	https://www.theguardian.com/global-development/gallery/2021/sep/13/retaking-mekelle-the-fight-for-tigray-in-pictures
482	the guardian	images/img_482.jpg	Huntington Beach reopens after water-quality testing results showed non-detectable amounts of oil as surfers go back in the sea.	A group of surfers walk across the beach	USA	https://www.theguardian.com/news/gallery/2021/oct/12/columbus-defaced-turkish-mosaics-guard-tuesday-best-photos
483	the guardian	images/img_483.jpg	Red paint covers a statue of Christopher Columbus in Belgrave Square Gardens.	Two women walking by a statue	UK	https://www.theguardian.com/news/gallery/2021/oct/12/columbus-defaced-turkish-mosaics-guard-tuesday-best-photos
484	the guardian	images/img_484.jpg	A model wears a Pink Magnolia dress during Mercedes-Benz fashion week	A person in a pink dress	Mexico	https://www.theguardian.com/news/gallery/2021/oct/12/columbus-defaced-turkish-mosaics-guard-tuesday-best-photos
485	the guardian	images/img_485.jpg	People sunbathe as workers clean the contaminated beach.	A group of people lying on the beach	USA	https://www.theguardian.com/news/gallery/2021/oct/12/columbus-defaced-turkish-mosaics-guard-tuesday-best-photos
486	the guardian	images/img_486.jpg	Fans watch a qualifying game for the Qatar 2021 World Cup between Libya and Egypt	A large crowd of people	Libya	https://www.theguardian.com/news/gallery/2021/oct/12/columbus-defaced-turkish-mosaics-guard-tuesday-best-photos
487	the guardian	images/img_487.jpg	Demonstrators from Insulate Britain burn pages from court injunctions outside the high court.	A group of people in safety vests working on a fire hydrant	UK	https://www.theguardian.com/news/gallery/2021/oct/12/columbus-defaced-turkish-mosaics-guard-tuesday-best-photos
488	the guardian	images/img_488.jpg	Members of the Royal Guard feel the strain during a military parade on National Day at Paseo de la Castellana.	A group of men in uniform	Spain	https://www.theguardian.com/news/gallery/2021/oct/12/columbus-defaced-turkish-mosaics-guard-tuesday-best-photos
489	the guardian	images/img_489.jpg	The Labour leader, Keir Starmer, sits in the driving seat during a visit to Mantra Learning, an HGV training provider, in Greater Manchester	A person driving a car	UK	https://www.theguardian.com/news/gallery/2021/oct/12/columbus-defaced-turkish-mosaics-guard-tuesday-best-photos
490	the guardian	images/img_490.jpg	Extinction Rebellion activists are dragged away by police officers on the second day of action during the Week of Climate Rebellion	A person lying on the ground with a person lying on the back	Netherlands	https://www.theguardian.com/news/gallery/2021/oct/12/columbus-defaced-turkish-mosaics-guard-tuesday-best-photos
491	the guardian	images/img_491.jpg	A resident is pulled along a rope as rescuers wait on the other side of a swollen river in Cagayan province.	A group of people in a river	Philippines	https://www.theguardian.com/news/gallery/2021/oct/12/columbus-defaced-turkish-mosaics-guard-tuesday-best-photos
492	the guardian	images/img_492.jpg	Volunteers pose during a press conference to announce the International Day of the Dead parade at the Museum of Mexico City	A group of people in clothing	Mexico	https://www.theguardian.com/news/gallery/2021/oct/12/columbus-defaced-turkish-mosaics-guard-tuesday-best-photos
493	the guardian	images/img_493.jpg	The country’s leader, Kim Jong-un, attends the Defence Development exhibition	A group of people sitting at tables	North Korea	https://www.theguardian.com/news/gallery/2021/oct/12/columbus-defaced-turkish-mosaics-guard-tuesday-best-photos
494	the guardian	images/img_494.jpg	A Hindu devotee dressed as a deity joins Shikali Jatra festival celebrations on the outskirts of Kathmandu	A person in a garment riding a horse in a crowd of people	Nepal	https://www.theguardian.com/news/gallery/2021/oct/12/columbus-defaced-turkish-mosaics-guard-tuesday-best-photos
495	the guardian	images/img_495.jpg	Police on horseback ride past Sydney Opera House after Covid stay-at-home orders were lifted in New South Wales	A couple of people ride horses	Australia	https://www.theguardian.com/news/gallery/2021/oct/12/columbus-defaced-turkish-mosaics-guard-tuesday-best-photos
496	the guardian	images/img_496.jpg	A man surveys the damage to the kitchen of a house following an earthquake in Saba village in which one person was killed and nine others injured.	A person in a kitchen	Greece	https://www.theguardian.com/news/gallery/2021/sep/27/heathrow-protest-and-a-yokahama-wedding-mondays-best-photos
497	the guardian	images/img_497.jpg	A Republican guard stands to attention in front of the Louvre museum pyramid ahead of the visit by French President Macron and Greek Prime Minister Mitsotakis.	A person wearing a garment	France	https://www.theguardian.com/news/gallery/2021/sep/27/heathrow-protest-and-a-yokahama-wedding-mondays-best-photos
498	the guardian	images/img_498.jpg	A model presents a creation by designer Victor Weinsanto as part of his Spring/Summer 2022 women’s ready-to-wear collection during Paris Fashion Week.	A person wearing a pink wig	France	https://www.theguardian.com/news/gallery/2021/sep/27/heathrow-protest-and-a-yokahama-wedding-mondays-best-photos
499	the guardian	images/img_499.jpg	The shadow chancellor, Rachel Reeves, giving her keynote speech at the Labour party conference at the Brighton Centre	A woman in a red dress	UK	https://www.theguardian.com/news/gallery/2021/sep/27/heathrow-protest-and-a-yokahama-wedding-mondays-best-photos
500	the guardian	images/img_500.jpg	Ballet dancers Natalia Osipova, Isaac Hernandez and Jason Kittelberger perform a routine before the world premiere of a contemporary dance production of Carmen at The Exchange	A group of men playing frisbee	UK	https://www.theguardian.com/news/gallery/2021/sep/27/heathrow-protest-and-a-yokahama-wedding-mondays-best-photos
501	the guardian	images/img_501.jpg	Olaf Scholz waves as he is applauded by fellow SPD members before a party leadership meeting the day after a narrow SPD win in the German general election	Hubertus Heil, Olaf Scholz et al. standing in front of a table with a sign	Germany	https://www.theguardian.com/news/gallery/2021/sep/27/heathrow-protest-and-a-yokahama-wedding-mondays-best-photos
502	the guardian	images/img_502.jpg	The mayor of London, Sadiq Khan, runs along the seafront in Brighton where the Labour party is holding its conference	Sadiq Khan running on a street	UK	https://www.theguardian.com/news/gallery/2021/sep/27/heathrow-protest-and-a-yokahama-wedding-mondays-best-photos
503	the guardian	images/img_503.jpg	Police officers fire teargas at protesters who started throwing stones.	A group of people in military uniforms	Indonesia	https://www.theguardian.com/news/gallery/2021/sep/27/heathrow-protest-and-a-yokahama-wedding-mondays-best-photos
504	the guardian	images/img_504.jpg	Shia Muslim pilgrims take part in a mourning ceremony before the holy ritual of Arbaeen	A crowd of people	Iraq	https://www.theguardian.com/news/gallery/2021/sep/27/heathrow-protest-and-a-yokahama-wedding-mondays-best-photos
505	the guardian	images/img_505.jpg	Orthodox Jews wearing prayer shawls and carrying the four species (the four plants that are mentioned in the Torah as being relevant to Sukkot) worship during the special prayer Hoshana Raba as part of the celebration of the seventh day of Sukkot, the Feast of the Tabernacles, in the Mount of Olives	A group of people in white robes	Israel	https://www.theguardian.com/news/gallery/2021/sep/27/heathrow-protest-and-a-yokahama-wedding-mondays-best-photos
506	the guardian	images/img_506.jpg	Pupils leave their classrooms at a school in the city	A group of people holding a stick	Afghanistan	https://www.theguardian.com/news/gallery/2021/sep/27/heathrow-protest-and-a-yokahama-wedding-mondays-best-photos
507	the guardian	images/img_507.jpg	Women hold religious flags as they commemorate Arbaeen	A group of people wearing green and black hats	Afghanistan	https://www.theguardian.com/news/gallery/2021/sep/27/heathrow-protest-and-a-yokahama-wedding-mondays-best-photos
508	the guardian	images/img_508.jpg	Farmers shout from their tractors during a nationwide strike against the central government’s overhaul of the agricultural sector	A group of people riding on a vehicle with flags	India	https://www.theguardian.com/news/gallery/2021/sep/27/heathrow-protest-and-a-yokahama-wedding-mondays-best-photos
509	the guardian	images/img_509.jpg	President Emmanuel Macron visits the International Catering Hotel and Food Trade Fair	Emmanuel Macron, Guillaume Gomez et al. in a room	France	https://www.theguardian.com/news/gallery/2021/sep/27/heathrow-protest-and-a-yokahama-wedding-mondays-best-photos
510	the guardian	images/img_510.jpg	A group of Haitians cross the jungle on their way to Panama as they attempt to reach the US.	A group of people sitting on a rock in the woods	Colombia	https://www.theguardian.com/news/gallery/2021/sep/27/heathrow-protest-and-a-yokahama-wedding-mondays-best-photos
511	the guardian	images/img_511.jpg	Search and rescue workers help flood evacuees disembark from a helicopter in Agassiz	A group of firefighters putting out a fire	Canada	https://www.theguardian.com/us-news/gallery/2021/nov/17/canada-hit-by-heavy-rains-and-floods-in-british-columbia-in-pictures
512	the guardian	images/img_512.jpg	A man, child and dog who were rescued by a volunteer in a boat after being stranded by high water walk on high ground.	A group of people walking a dog on a wet road	Canada	https://www.theguardian.com/us-news/gallery/2021/nov/17/canada-hit-by-heavy-rains-and-floods-in-british-columbia-in-pictures
513	the guardian	images/img_513.jpg	A woman and children who were stranded by high water are rescued by a volunteer operating a boat in Abbotsford.	A group of people ride a boat	Canada	https://www.theguardian.com/us-news/gallery/2021/nov/17/canada-hit-by-heavy-rains-and-floods-in-british-columbia-in-pictures
514	the guardian	images/img_514.jpg	Pedestrians walk past a barge that came loose from its mooring and was driven ashore by high winds.	A group of people walking on a path by a waterfall	Canada	https://www.theguardian.com/us-news/gallery/2021/nov/17/canada-hit-by-heavy-rains-and-floods-in-british-columbia-in-pictures
515	the guardian	images/img_515.jpg	A cyclist crosses a flooded road after heavy rainstorms.	A person riding a bicycle through a flooded street	Canada	https://www.theguardian.com/us-news/gallery/2021/nov/17/canada-hit-by-heavy-rains-and-floods-in-british-columbia-in-pictures
516	the guardian	images/img_516.jpg	Crew members from Royal Canadian Air Force 442 Squadron lead some of over 300 motorists stranded by mudslides towards a CH-149 Cormorant helicopter for their evacuation, in Agassiz	A group of people walking on a wet road with a yellow truck	Canada	https://www.theguardian.com/us-news/gallery/2021/nov/17/canada-hit-by-heavy-rains-and-floods-in-british-columbia-in-pictures
517	the guardian	images/img_517.jpg	A girl wears a traditional Andalusian dress during the pilgrimage of El Rocío in the south of Spain	A person in a colorful dress	Spain	https://www.theguardian.com/artanddesign/gallery/2021/nov/23/dresses-deities-and-devil-chasing-religious-pilgrimages-in-pictures
518	the guardian	images/img_518.jpg	A group of pilgrims pray in the Massabielle cave where the Virgin Mary is said to have appeared numerous times to a young girl in 1858	A woman in a blue dress holding a sign	France	https://www.theguardian.com/artanddesign/gallery/2021/nov/23/dresses-deities-and-devil-chasing-religious-pilgrimages-in-pictures
519	the guardian	images/img_519.jpg	Two Italian nurses are seen walking in front of the sanctuary of Our Lady of Lourdes.	A man and woman posing for a picture in front of a building	France	https://www.theguardian.com/artanddesign/gallery/2021/nov/23/dresses-deities-and-devil-chasing-religious-pilgrimages-in-pictures
520	the guardian	images/img_520.jpg	A man dressed as Baron Samedi, an incarnation of a Vodou deity, is drinking rhum in the cemetery of Port-au-Prince, Haiti to access a trance state. Around him, other believers are gathered to get his blessing.	A person on a stage with a microphone and a crowd of people	Haiti	https://www.theguardian.com/artanddesign/gallery/2021/nov/23/dresses-deities-and-devil-chasing-religious-pilgrimages-in-pictures
521	the guardian	images/img_521.jpg	A man is dressed as a Guédé in the cemetery of Port-au-Prince, Haiti. In Vodou mythology, the Guédés represent the spirits of death and resurrection	A person in a garment	Haiti	https://www.theguardian.com/artanddesign/gallery/2021/nov/23/dresses-deities-and-devil-chasing-religious-pilgrimages-in-pictures
522	the guardian	images/img_522.jpg	A man takes part in one of the many parades in the city of Pernik, Bulgaria during the annual Surva festival.	A person wearing a garment	Bulgaria	https://www.theguardian.com/artanddesign/gallery/2021/nov/23/dresses-deities-and-devil-chasing-religious-pilgrimages-in-pictures
523	the guardian	images/img_523.jpg	A man tries out his costume in front of an old communist mural	A person wearing a garment	Bulgaria	https://www.theguardian.com/artanddesign/gallery/2021/nov/23/dresses-deities-and-devil-chasing-religious-pilgrimages-in-pictures
524	the guardian	images/img_524.jpg	A young boy wears a traditional Kukeri costume	A person wearing a garment	Bulgaria	https://www.theguardian.com/artanddesign/gallery/2021/nov/23/dresses-deities-and-devil-chasing-religious-pilgrimages-in-pictures
525	the guardian	images/img_525.jpg	Hadia, 10, a fourth-grade primary school student, walks back from school through an alleyway near her home in Kabul	A person walking down a sidewalk	Afghanistan	https://www.theguardian.com/artanddesign/gallery/2021/nov/22/dreams-on-hold-afghan-girls-and-women-are-desperate-to-get-back-to-class
526	the guardian	images/img_526.jpg	Hadia student attends a class in Kabul	A classroom with people sitting at desks	Afghanistan	https://www.theguardian.com/artanddesign/gallery/2021/nov/22/dreams-on-hold-afghan-girls-and-women-are-desperate-to-get-back-to-class
527	the guardian	images/img_527.jpg	Hadia (centre) leaves school after a class in Kabul.	A group of people wearing head scarves and posing for the camera	Afghanistan	https://www.theguardian.com/artanddesign/gallery/2021/nov/22/dreams-on-hold-afghan-girls-and-women-are-desperate-to-get-back-to-class
528	the guardian	images/img_528.jpg	Sahar, 17, an 11th-grade secondary school student, helps her sister, Hadia, with her homework after school at their home in Kabul.	A group of people wearing masks and reading a book	Afghanistan	https://www.theguardian.com/artanddesign/gallery/2021/nov/22/dreams-on-hold-afghan-girls-and-women-are-desperate-to-get-back-to-class
529	the guardian	images/img_529.jpg	Sahar, 17, sits with her sister, Sewita, 19, at their home in Kabul	A couple of women sitting on a couch	Afghanistan	https://www.theguardian.com/artanddesign/gallery/2021/nov/22/dreams-on-hold-afghan-girls-and-women-are-desperate-to-get-back-to-class
530	the guardian	images/img_530.jpg	Sahar puts nail polish at home in Kabul	A person holding the hands up	Afghanistan	https://www.theguardian.com/artanddesign/gallery/2021/nov/22/dreams-on-hold-afghan-girls-and-women-are-desperate-to-get-back-to-class
531	the guardian	images/img_531.jpg	Sahar shows Reuters her former school, where she was allowed back to sit in the classroom	A person sitting at a desk	Afghanistan	https://www.theguardian.com/artanddesign/gallery/2021/nov/22/dreams-on-hold-afghan-girls-and-women-are-desperate-to-get-back-to-class
532	the guardian	images/img_532.jpg	Hawa reads a book as she sits on a windows at her home in Kabul.	A man sitting on a window ledge reading a book	Afghanistan	https://www.theguardian.com/artanddesign/gallery/2021/nov/22/dreams-on-hold-afghan-girls-and-women-are-desperate-to-get-back-to-class
533	the guardian	images/img_533.jpg	Female primary school students leave school after a class in Kabul	A group of women in white	Afghanistan	https://www.theguardian.com/artanddesign/gallery/2021/nov/22/dreams-on-hold-afghan-girls-and-women-are-desperate-to-get-back-to-class
534	the guardian	images/img_534.jpg	A Taliban fighter gestures to a colleague as he stands by the entrance to a school, in Kabul, Afghanistan	A person standing in a doorway	Afghanistan	https://www.theguardian.com/artanddesign/gallery/2021/nov/22/dreams-on-hold-afghan-girls-and-women-are-desperate-to-get-back-to-class
535	the guardian	images/img_535.jpg	People line the street as the hearse carrying the coffin of Conservative MP, David Amess, arrives outside St Mary’s Church in Prittlewell before his funeral service	A group of people standing around a car in a parade	UK	https://www.theguardian.com/news/gallery/2021/nov/22/womens-copa-libertadores-and-the-amas-mondays-best-photos
536	the guardian	images/img_536.jpg	Sustainable Christmas trees are harvested for rental by a tree grower in De Glind. The trees are planted back after Christmas in January and grown without fertilisers or chemical pesticides	A person standing in a forest	Netherlands	https://www.theguardian.com/news/gallery/2021/nov/22/womens-copa-libertadores-and-the-amas-mondays-best-photos
537	the guardian	images/img_537.jpg	A winter swimming enthusiast makes their way through a partly frozen lake during snowfall at a park in Liaoning province	A plane flying over a large rock	China	https://www.theguardian.com/news/gallery/2021/nov/22/womens-copa-libertadores-and-the-amas-mondays-best-photos
538	the guardian	images/img_538.jpg	Bus passengers wear face masks during the coronavirus pandemic	A group of people in a train	Russia	https://www.theguardian.com/news/gallery/2021/nov/22/womens-copa-libertadores-and-the-amas-mondays-best-photos
539	the guardian	images/img_539.jpg	Video footage appears to show missing tennis player Peng Shuai signing large tennis balls at the opening ceremony of Fila Kids Junior Tennis Challenger Final	A group of people holding yellow balls	China	https://www.theguardian.com/news/gallery/2021/nov/22/womens-copa-libertadores-and-the-amas-mondays-best-photos
540	the guardian	images/img_540.jpg	A group of girls react after Brazil’s Corinthians defeated Colombia’s Santa Fe in the Women’s Copa Libertadores final football match at the Gran Parque Central stadium	A group of people posing for a photo	Uruguay	https://www.theguardian.com/news/gallery/2021/nov/22/womens-copa-libertadores-and-the-amas-mondays-best-photos
541	the guardian	images/img_541.jpg	CBI president Karan Bilimoria accompanies Sir Keir Starmer during a walkabout in the offices of the software company Advanced at the Mailbox before the Labour leader’s speech to the CBI annual conference	A group of men in suits	UK	https://www.theguardian.com/news/gallery/2021/nov/22/womens-copa-libertadores-and-the-amas-mondays-best-photos
542	the guardian	images/img_542.jpg	Boris Johnson looks at a new electric shuttle bus as he leaves after speaking at the CBI annual conference	Boris Johnson in a suit and tie	UK	https://www.theguardian.com/news/gallery/2021/nov/22/womens-copa-libertadores-and-the-amas-mondays-best-photos
543	the guardian	images/img_543.jpg	US vice-president Kamala Harris lays a hand on the Flight 93 National Memorial during an event commemorating the 20th anniversary of the 9/11 attacks, in Stoystown, Pennsylvania	A person pointing to a white wall	USA	https://www.theguardian.com/media/gallery/2021/sep/11/20th-anniversary-of-the-911-attacks-in-pictures
544	the guardian	images/img_544.jpg	Former US president Barack Obama, former first lady Michelle Obama, President Joe Biden, First Lady Jill Biden and former New York City mayor Michael Bloomberg attend the annual September 11 commemoration ceremony at the 9/11 Memorial and Museum on September 11, 2021 in New York City	A group of people wearing masks	USA	https://www.theguardian.com/media/gallery/2021/sep/11/20th-anniversary-of-the-911-attacks-in-pictures
545	the guardian	images/img_545.jpg	People look at the World Trade Center and the skyline of New York from Jersey City during the 20th anniversary of the September 11 attacks	A group of people standing on a dock with a city skyline in the background	USA	https://www.theguardian.com/media/gallery/2021/sep/11/20th-anniversary-of-the-911-attacks-in-pictures
546	the guardian	images/img_546.jpg	A woman pays her respects at the September 11 Memorial Garden in London’s Grosvenor Square	A man walking a dog	USA	https://www.theguardian.com/media/gallery/2021/sep/11/20th-anniversary-of-the-911-attacks-in-pictures
547	the guardian	images/img_547.jpg	Former US president George W Bush wipes his eyes next to former first lady Laura Bush, after he spoke at a memorial for the passengers and crew of United Flight 93 in Shanksville, Pennsylvania	George W. Bush, Laura Bush sitting in chairs with flowers and a man in a suit	USA	https://www.theguardian.com/media/gallery/2021/sep/11/20th-anniversary-of-the-911-attacks-in-pictures
548	the guardian	images/img_548.jpg	A firefighter stands outside the FDNY Ten House in New York. Five members of the Fire Department of New York’s Ten House died on duty on 11 September, 2001	A man standing next to a sign	USA	https://www.theguardian.com/media/gallery/2021/sep/11/20th-anniversary-of-the-911-attacks-in-pictures
549	the guardian	images/img_549.jpg	Family members and loved ones of victims attend the annual September 11 commemoration ceremony at the 9/11 Memorial and Museum	A woman hugging a man	USA	https://www.theguardian.com/media/gallery/2021/sep/11/20th-anniversary-of-the-911-attacks-in-pictures
550	the guardian	images/img_550.jpg	Members of a feminist collective take part in a protest on International Safe Abortion Day	Two people wearing clothing	Mexico	https://www.theguardian.com/news/gallery/2021/sep/29/tropical-storm-mexico-protest-wednesday-best-photos
551	the guardian	images/img_551.jpg	Kim Leadbeater, the MP for Batley and Spen, speaks at the Labour party conference	A person standing at a podium	UK	https://www.theguardian.com/news/gallery/2021/sep/29/tropical-storm-mexico-protest-wednesday-best-photos
552	the guardian	images/img_552.jpg	A resident casts a net to go fishing in his partially submerged village after floods caused by Tropical Storm Dianmu	A man standing in front of a waterfall	Thailand	https://www.theguardian.com/news/gallery/2021/sep/29/tropical-storm-mexico-protest-wednesday-best-photos
553	the guardian	images/img_553.jpg	Staff at Windsor Castle clean the 19th-century gilt bronze candelabra in the Crimson Drawing Room in preparation for the opening later this week of the Semi-State Rooms to the public	A person standing on a ladder in a room with a chandelier	UK	https://www.theguardian.com/news/gallery/2021/sep/29/tropical-storm-mexico-protest-wednesday-best-photos
554	the guardian	images/img_554.jpg	A Taliban fighter carries a rocket-propelled grenade launcher on to a pirate ship ride during a visit to a fairground at Qargha Lake	A person standing on a roller coaster	Afghanistan	https://www.theguardian.com/news/gallery/2021/sep/29/tropical-storm-mexico-protest-wednesday-best-photos
555	the guardian	images/img_555.jpg	Mia Blichfeldt of Denmark competes in the badminton women’s single match during day four of the TotalEnergies BWF Sudirman Cup	A man holding a bat	Finland	https://www.theguardian.com/news/gallery/2021/sep/29/tropical-storm-mexico-protest-wednesday-best-photos
556	the guardian	images/img_556.jpg	The artist Wayne Binitie takes a closer look at his glass sculpture containing air from the year 1765, which is on display at the new immersive exhibition Polar Zero at the Glasgow Science Centre, to coincide with the Cop26 summit in the city next month	A man wearing a hat	Scotland	https://www.theguardian.com/news/gallery/2021/sep/29/tropical-storm-mexico-protest-wednesday-best-photos
557	the guardian	images/img_557.jpg	Patients with dengue fever rest under mosquito nets as relatives visit them in hospital	A room with many beds	Pakistan	https://www.theguardian.com/news/gallery/2021/sep/29/tropical-storm-mexico-protest-wednesday-best-photos
558	the guardian	images/img_558.jpg	A health worker administers a dose of the Covid-19 vaccine during a national vaccination campaign	A man in a blue head scarf	Bangladesh	https://www.theguardian.com/news/gallery/2021/sep/29/tropical-storm-mexico-protest-wednesday-best-photos
559	the guardian	images/img_559.jpg	People wait in line to cross the Spin Boldak border gate to reach Pakistan, as Pakistani forces and Taliban members stand guard	A group of people behind a fence	Afghanistan	https://www.theguardian.com/news/gallery/2021/sep/29/tropical-storm-mexico-protest-wednesday-best-photos
560	the guardian	images/img_560.jpg	The family of Betty Campbell, Wales’s first black headteacher, unveil a statue of her in Central Square	A statue of a woman holding a purple umbrella	Wales	https://www.theguardian.com/news/gallery/2021/sep/29/tropical-storm-mexico-protest-wednesday-best-photos
561	the guardian	images/img_561.jpg	A boy swims through a flooded village in the central Thai province, as floods caused by Tropical Storm Dianmu continue	A person in a pool	Thailand	https://www.theguardian.com/news/gallery/2021/sep/29/tropical-storm-mexico-protest-wednesday-best-photos
562	the guardian	images/img_562.jpg	The Taliban on patrol in Kabul. One fighter after another, they are trading in their characteristic long flowing garb for stiff military uniforms	A group of people walking down a street	Afghanistan	https://www.theguardian.com/world/gallery/2021/oct/06/taliban-patrols-return-streets-kabul-in-pictures
563	the guardian	images/img_563.jpg	An Afghan boy watches as the Taliban search for a man accused of a stabbing. The group returned to power this summer, and in doing so resumed responsibility for policing	A person holding a gun	Afghanistan	https://www.theguardian.com/world/gallery/2021/oct/06/taliban-patrols-return-streets-kabul-in-pictures
564	the guardian	images/img_564.jpg	A Taliban fighter listens as two men argue over a claim of late rent payment in Kabul	A group of men standing outside	Afghanistan	https://www.theguardian.com/world/gallery/2021/oct/06/taliban-patrols-return-streets-kabul-in-pictures
565	the guardian	images/img_565.jpg	Shadows of the Taliban are cast over drug users detained at a police station	A group of people sitting on the ground next to a brick wall	Afghanistan	https://www.theguardian.com/world/gallery/2021/oct/06/taliban-patrols-return-streets-kabul-in-pictures
566	the guardian	images/img_566.jpg	A crowd gathers as drug users are detained	A group of people standing on a bridge	Afghanistan	https://www.theguardian.com/world/gallery/2021/oct/06/taliban-patrols-return-streets-kabul-in-pictures
567	the guardian	images/img_567.jpg	A Taliban fighter looks into a holding cell at a police station	A person in a mask holding a gun	Afghanistan	https://www.theguardian.com/world/gallery/2021/oct/06/taliban-patrols-return-streets-kabul-in-pictures
568	the guardian	images/img_568.jpg	Pul-e-Charkhi was previously the main government prison for holding captured Taliban members and was long notorious for abuses, poor conditions and severe overcrowding. Now it is controlled by the Taliban	A group of men looking at a cage with a bird inside	Afghanistan	https://www.theguardian.com/world/gallery/2021/oct/06/taliban-patrols-return-streets-kabul-in-pictures
569	the guardian	images/img_569.jpg	Taliban fighters talk to a detainee before transferring him to a court in Kabul	A group of people in a room	Afghanistan	https://www.theguardian.com/world/gallery/2021/oct/06/taliban-patrols-return-streets-kabul-in-pictures
570	the guardian	images/img_570.jpg	An Afghan boy watches as the Taliban search for a man accused of a stabbing in Kabul	A man holding a gun next to a boy	Afghanistan	https://www.theguardian.com/world/gallery/2021/oct/06/taliban-patrols-return-streets-kabul-in-pictures
571	the guardian	images/img_571.jpg	The Swedish climate activist Greta Thunberg is surrounded by members of the media as she arrives for a three-day Youth4Climate summit in Milan.	A woman looking at a man	Italy	https://www.theguardian.com/artanddesign/gallery/2021/oct/01/twenty-photographs-of-the-week
572	the guardian	images/img_572.jpg	Afghan boys ride in the trunk of a car in Kabul.	A group of people in a car	Afghanistan	https://www.theguardian.com/artanddesign/gallery/2021/oct/01/twenty-photographs-of-the-week
573	the guardian	images/img_573.jpg	Haitian migrants cross the jungle of the Darien Gap near Acandi as they head to Panama on their way to the US. Armed with machetes, lanterns and tents, they have to trek at least five days through the Darien jungle, battling snakes, steep ravines, swollen rivers, tropical downpours and criminals often linked to drug trafficking.	A group of people in a river	Colombia	https://www.theguardian.com/artanddesign/gallery/2021/oct/01/twenty-photographs-of-the-week
574	the guardian	images/img_574.jpg	A Syrian migrant sleeps inside a forest near the village of Ieropigi at the border between Greece and Albania.	A person lying on the ground outside	Greece	https://www.theguardian.com/artanddesign/gallery/2021/oct/01/twenty-photographs-of-the-week
575	the guardian	images/img_575.jpg	A resident wades through floodwaters outside her home in Ayutthaya as Tropical Storm Dianmu caused flooding in 30 provinces across the country.	A person in a body of water	Thailand	https://www.theguardian.com/artanddesign/gallery/2021/oct/01/twenty-photographs-of-the-week
576	the guardian	images/img_576.jpg	Employees spray disinfectant as a precaution against the coronavirus at the Paragon cineplex in Bangkok.	Two men in a theater	Thailand	https://www.theguardian.com/artanddesign/gallery/2021/oct/01/twenty-photographs-of-the-week
577	the guardian	images/img_577.jpg	Commuters take shelter under a bus stop during heavy rain in Yangon, Myanmar.	A group of people standing on a stage	Myanmar	https://www.theguardian.com/global-development/gallery/2021/sep/25/haitians-fleeing-and-hotel-rwanda-case-human-rights-this-fortnight-in-pictures
578	the guardian	images/img_578.jpg	Children stand under a tree on the site of a future camp for Eritrean refugees near the village of Dabat, 40 miles from the city of Gondar in Ethiopia.	A group of people standing under a tree	Ethiopia	https://www.theguardian.com/global-development/gallery/2021/sep/25/haitians-fleeing-and-hotel-rwanda-case-human-rights-this-fortnight-in-pictures
579	the guardian	images/img_579.jpg	An Afghan musician holds a tabla drum in Kabul.	A person holding a mask	Afghanistan	https://www.theguardian.com/global-development/gallery/2021/sep/25/haitians-fleeing-and-hotel-rwanda-case-human-rights-this-fortnight-in-pictures
580	the guardian	images/img_580.jpg	Joe Biden high-fives 16-month-old Breklyn Petroelje as he joins military personnel and their families at a Thanksgiving event in North Carolina	A group of people with face paint	USA	https://www.theguardian.com/news/gallery/2021/nov/23/a-requiem-mass-and-the-french-spider-man-tuesdays-best-photos
581	the guardian	images/img_581.jpg	Politicians, from left, the former prime ministers Sir John Major, David Cameron and Theresa May; the Speaker of the House of Commons, Sir Lindsay Hoyle; the home secretary Priti Patel, and the prime minister, Boris Johnson, attend the requiem mass for Sir David Amess MP at Westminster Cathedral.	Boris Johnson, David Cameron, John Major, Lindsay Hoyle, Theresa May et al. sitting on a bench	UK	https://www.theguardian.com/news/gallery/2021/nov/23/a-requiem-mass-and-the-french-spider-man-tuesdays-best-photos
582	the guardian	images/img_582.jpg	Pupils at Phan Huy Chu high school wait to receive a dose of the Pfizer Covid vaccine	A group of people wearing masks	Vietnam	https://www.theguardian.com/news/gallery/2021/nov/23/a-requiem-mass-and-the-french-spider-man-tuesdays-best-photos
583	the guardian	images/img_583.jpg	The French urban climber Alain Robert, popularly known as the French Spider-Man, climbs the 154-metre-high Skyper building	A few people climbing a tall building	Germany	https://www.theguardian.com/news/gallery/2021/nov/23/a-requiem-mass-and-the-french-spider-man-tuesdays-best-photos
584	the guardian	images/img_584.jpg	Used cars are piled at a scrapyard in Helwan. An increasing number of vehicles are being either scrapped or recycled in an attempt to lower pollution	A large group of cars in a parking lot	Egypt	https://www.theguardian.com/news/gallery/2021/nov/23/a-requiem-mass-and-the-french-spider-man-tuesdays-best-photos
585	the guardian	images/img_585.jpg	Officials work at the site of a bus accident, in which at least 46 people were killed	A truck on the street	Bulgaria	https://www.theguardian.com/news/gallery/2021/nov/23/a-requiem-mass-and-the-french-spider-man-tuesdays-best-photos
586	the guardian	images/img_586.jpg	A Kurdish family from Duhok, Iraq in a forest near the Polish-Belarus border.	A group of people sitting in a pile of blankets in the woods	Poland	www.theguardian.com/global-development/gallery/2021/nov/20/migrant-caravan-and-qatars-tarnished-world-cup-human-rights-this-fortnight-in-pictures
587	the guardian	images/img_587.jpg	Police and security officers drive to protests in Omdurman in Sudan.	A truck carrying people	Sudan	www.theguardian.com/global-development/gallery/2021/nov/20/migrant-caravan-and-qatars-tarnished-world-cup-human-rights-this-fortnight-in-pictures
588	the guardian	images/img_588.jpg	Hundreds rally in Sudan on 17 November in a protest against the military takeover	A group of people holding up their hands	Sudan	https://www.theguardian.com/world/2021/nov/17/sudanese-forces-shoot-dead-at-least-14-protesters-against-coup
589	the guardian	images/img_589.jpg	Central American and Haitian migrants and asylum seekers in Mexico walk towards the US border.	A large crowd of peple	USA	www.theguardian.com/global-development/gallery/2021/nov/20/migrant-caravan-and-qatars-tarnished-world-cup-human-rights-this-fortnight-in-pictures
590	the guardian	images/img_590.jpg	A banner asking Qatar to act on human rights abuses is held by supporters at a football World Cup qualifier game between Belgium and Estonia on 13 November	A crowd of people	Belgium	www.theguardian.com/global-development/gallery/2021/nov/20/migrant-caravan-and-qatars-tarnished-world-cup-human-rights-this-fortnight-in-pictures
591	the guardian	images/img_591.jpg	People cross into Pakistan from Afghanistan.	A group of people standing together	Pakistan	www.theguardian.com/global-development/gallery/2021/nov/20/migrant-caravan-and-qatars-tarnished-world-cup-human-rights-this-fortnight-in-pictures
592	the guardian	images/img_592.jpg	Migrant children at the Kuznitsa checkpoint at the border between Belarus and Poland.	A group of people posing for a photo next to a campfire	Belarus	https://www.theguardian.com/artanddesign/gallery/2021/nov/19/twenty-photographs-of-the-week
593	the guardian	images/img_593.jpg	Palestinian youth practice parkour in Al-Shati refugee camp	A man doing a trick on a skateboard	Palestine	https://www.theguardian.com/artanddesign/gallery/2021/nov/19/twenty-photographs-of-the-week
594	the guardian	images/img_594.jpg	Palestinian youths perform a show with fire in front of people in the Al-Shejaiya neighbourhood	A group of people standing around a burning building	Palestine	https://www.theguardian.com/artanddesign/gallery/2021/nov/19/twenty-photographs-of-the-week
595	the guardian	images/img_595.jpg	Demonstrators take part in a march towards the US embassy, during a rally marking the 48th anniversary of the 1973 Athens Polytechnic uprising against the military junta	A group of people holding sticks	Greece	https://www.theguardian.com/artanddesign/gallery/2021/nov/19/twenty-photographs-of-the-week
596	the guardian	images/img_596.jpg	Emergency personnel assist migrants disembarking from a maritime rescue vessel in the port of Arguineguín, after their rescue off the coast of Gran Canaria	A man in a white suit	Spain	https://www.theguardian.com/artanddesign/gallery/2021/nov/19/twenty-photographs-of-the-week
597	the guardian	images/img_597.jpg	A family of Central African refugees waits to leave for a transit centre before a repatriation flight to Bangui.	A group of people posing for a photo	Democratic Republic of Congo	https://www.theguardian.com/artanddesign/gallery/2021/nov/19/twenty-photographs-of-the-week
598	the guardian	images/img_598.jpg	Migrants walk through Palomares as they head in a caravan towards the US	A group of people walking with strollers and strollers	Mexico	https://www.theguardian.com/artanddesign/gallery/2021/nov/19/twenty-photographs-of-the-week
599	the guardian	images/img_599.jpg	Migrants help fellow migrants on to the bed of a trailer in Jesus Carranza	A group of people climbing a mountain	Mexico	https://www.theguardian.com/artanddesign/gallery/2021/nov/19/twenty-photographs-of-the-week
600	the guardian	images/img_600.jpg	A supporter of Kyle Rittenhouse argues with a Black Lives Matter supporter in front of the Kenosha County courthouse while the jury deliberates over the Rittenhouse trial.	A man with a beard looking at another man	USA	https://www.theguardian.com/artanddesign/gallery/2021/nov/19/twenty-photographs-of-the-week
601	the guardian	images/img_601.jpg	A young girl looks at loaves of bread for sale at a bakery in Kabul	A person standing outside a building	Afghanistan	https://www.theguardian.com/artanddesign/gallery/2021/nov/19/twenty-photographs-of-the-week
602	the guardian	images/img_602.jpg	Health workers carry coolers for the Pfizer Covid-19 vaccine during a door-to-door vaccination campaign in Villa Maria del Triunfo on the outskirts of Lima	A man carrying a bag	Peru	https://www.theguardian.com/artanddesign/gallery/2021/nov/19/twenty-photographs-of-the-week
603	the guardian	images/img_603.jpg	Students attend class at the Le Grand Createur school in the gang-controlled Cité Soleil neighbourhood of Port-au-Prince	A person holding a baby	Haiti	https://www.theguardian.com/artanddesign/gallery/2021/nov/19/twenty-photographs-of-the-week
604	the guardian	images/img_604.jpg	Elementary students sit inside dividers as a preventive measure against Covid-19, as they attend the first day of physical classes at Longos elementary school.	A group of kids in a gym	Philippines	https://www.theguardian.com/artanddesign/gallery/2021/nov/19/twenty-photographs-of-the-week
605	the guardian	images/img_605.jpg	Indigenous leaders march in ceremonial dress from the Glasgow Green Park to the summit at the Scottish Event Campus	A group of people holding flags and a person holding a flag	Scotland	https://www.theguardian.com/environment/gallery/2021/nov/03/cop26-finance-protest-and-indigenous-voices-in-pictures
606	the guardian	images/img_606.jpg	The Chilean environment minister and Cop25 president, Carolina Schmidt, centre, walks with delegates from indigenous communities	A group of people in clothing	Scotland	https://www.theguardian.com/environment/gallery/2021/nov/03/cop26-finance-protest-and-indigenous-voices-in-pictures
607	the guardian	images/img_607.jpg	A Sikh man takes a dip in holy sarovar, or sacred pool, at the Golden Temple on the occasion of the anniversary of the birth of Guru Ram Das, the fourth Sikh guru	A person in the water	India	https://www.theguardian.com/news/gallery/2021/oct/22/pumpkin-pickers-and-a-sculpture-of-ruins-fridays-best-photos
608	the guardian	images/img_608.jpg	Youngsters grapple with a large pumpkin at Tulleys farm in Crawley.	A man and a woman kneeling in front of pumpkins	UK	https://www.theguardian.com/news/gallery/2021/oct/22/pumpkin-pickers-and-a-sculpture-of-ruins-fridays-best-photos
609	the guardian	images/img_609.jpg	A member of Sotheby’s staff wears a pair of Mughal spectacles with diamond lenses, in diamond-mounted frames.	A woman with glasses	UK	https://www.theguardian.com/news/gallery/2021/oct/22/pumpkin-pickers-and-a-sculpture-of-ruins-fridays-best-photos
610	the guardian	images/img_610.jpg	Fishermen bring in their catch from a lake in front of a power plant of the State Development and Investment Corporation outside Tianjin.	A group of men fishing	China	https://www.theguardian.com/artanddesign/gallery/2021/oct/15/twenty-photographs-of-the-week
611	aljazeera	images/img_611.jpg	Emily Roskam feeds sheep during a Seasolutions trial where sheep are fed seaweed extract to reduce their methane emissions.	A woman in a cage feeding sheep	Ireland	https://www.aljazeera.com/gallery/2021/11/23/photos-ireland-looks-to-seaweed-in-quest-to-curb-methane-from-cows
612	aljazeera	images/img_612.jpg	Coleman Dundass, a seaweed harvester, ties up three "climin", two-tonne seaweed bundles he has gathered, as he stands in his currach boat in Kilkieran, Ireland.	A person standing on a boat	Ireland	https://www.aljazeera.com/gallery/2021/11/23/photos-ireland-looks-to-seaweed-in-quest-to-curb-methane-from-cows
613	aljazeera	images/img_613.jpg	Mapuche rapper MC Millaray, right, stands next to activist Tiare Wentecol, photographed in traditional clothing, as they prepare for a traditional Mapuche drum ceremony in Santiago.	Two women wearing clothing	Chile	https://www.aljazeera.com/gallery/2021/11/22/chiles-indigenous-mapuche-gen-z-resist-police-brutality
614	aljazeera	images/img_614.jpg	The view outside Millaray’s grandmother’s home in the La Pincoya neighbourhood of Santiago, where Millaray grew up. The neighbourhood is known for its hip-hop culture and for being a hub of political resistance.	A building under construction	Chile	https://www.aljazeera.com/gallery/2021/11/22/chiles-indigenous-mapuche-gen-z-resist-police-brutality
615	aljazeera	images/img_615.jpg	Millaray poses in her traditional Mapuche Kupal as she gets ready to attend a rally to mark International Women's Day on March 8 in Santiago.	A person looking at a painting	Chile	https://www.aljazeera.com/gallery/2021/11/22/chiles-indigenous-mapuche-gen-z-resist-police-brutality
616	aljazeera	images/img_616.jpg	Mapuche activist and hip-hop artist, MC Millaray, centre, with her grandparents in La Pincoya, Santiago.	Candy Bowers et al. posing for the camera	Chile	https://www.aljazeera.com/gallery/2021/11/22/chiles-indigenous-mapuche-gen-z-resist-police-brutality
617	aljazeera	images/img_617.jpg	MC Millaray poses in front of a banner during the International Women’s Day rally in Santiago. The banner reads, “For our murdered sisters, an example of struggle and resistance”.	A person sitting on the ground	Chile	https://www.aljazeera.com/gallery/2021/11/22/chiles-indigenous-mapuche-gen-z-resist-police-brutality
618	aljazeera	images/img_618.jpg	An estimated 2 million people in Chile marched to mark International Women’s Day on March 8, 2021.	A crowd of people watching a person on a stage	Chile	https://www.aljazeera.com/gallery/2021/11/22/chiles-indigenous-mapuche-gen-z-resist-police-brutality
619	aljazeera	images/img_619.jpg	An Indigenous protester embraces MC Millaray.	A group of people in clothing	Chile	https://www.aljazeera.com/gallery/2021/11/22/chiles-indigenous-mapuche-gen-z-resist-police-brutality
620	aljazeera	images/img_620.jpg	South Sudanese refugees try to repair their hut in flood waters at a refugee camp which was inundated after heavy rain near in al-Qanaa in southern Sudan.	A person standing in water with a hut on the head	South Sudan	https://www.aljazeera.com/gallery/2021/9/23/photos-south-sudanese-refugees-homeless-again-after-sudan-floods
621	aljazeera	images/img_621.jpg	Indigenous protesters celebrate their culture with traditional clothes and music at the International Women’s Day march in 2021, Santiago	A group of people in clothing	Chile	https://www.aljazeera.com/gallery/2021/11/22/chiles-indigenous-mapuche-gen-z-resist-police-brutality
622	aljazeera	images/img_622.jpg	Police tape cordons off a street in Waukesha.	A group of toys on the ground	USA	https://www.aljazeera.com/gallery/2021/11/22/photos-five-dead-after-vehicle-plows-through-wisconsin-parade
623	aljazeera	images/img_623.jpg	Police and emergency personnel work on the crime scene in Waukesha.	A group of men standing next to a car on a street at night	USA	https://www.aljazeera.com/gallery/2021/11/22/photos-five-dead-after-vehicle-plows-through-wisconsin-parade
624	aljazeera	images/img_624.jpg	Emergency responders gather after a vehicle ploughed through the Christmas Parade.	A group of firefighters standing on the street	USA	https://www.aljazeera.com/gallery/2021/11/22/photos-five-dead-after-vehicle-plows-through-wisconsin-parade
625	aljazeera	images/img_625.jpg	A police officer cordons off the crime scene in Waukesha.	A person holding a large orange and white object	USA	https://www.aljazeera.com/gallery/2021/11/22/photos-five-dead-after-vehicle-plows-through-wisconsin-parade
626	aljazeera	images/img_626.jpg	Maria, 86, in her house in Orikhove. "I survived World War II and the famine of 1947. But I will not survive the Donbas war," she said.	An old man in a hat	Ukraine	https://www.aljazeera.com/gallery/2021/11/21/photos-on-ukraines-front-lines-europes-forgotten-war-grinds-on
627	aljazeera	images/img_627.jpg	Children playing in the front-line village of Slavne.	A group of people and dogs in a yard	Ukraine	https://www.aljazeera.com/gallery/2021/11/21/photos-on-ukraines-front-lines-europes-forgotten-war-grinds-on
628	aljazeera	images/img_628.jpg	Nastya, a mother of two, in the Ukrainian government-controlled village of Slavne.	A group of people posing for a photo with some animals	Ukraine	https://www.aljazeera.com/gallery/2021/11/21/photos-on-ukraines-front-lines-europes-forgotten-war-grinds-on
629	aljazeera	images/img_629.jpg	Demonstrators light flares during a rally against measures to battle the coronavirus pandemic in Vienna, Austria.	A group of people sitting in a room with a red curtain	Austria	https://www.aljazeera.com/gallery/2021/11/21/photos-pandemic-protests-erupt-over-covid-restrictions-in-austria-italy-croatia
630	aljazeera	images/img_630.jpg	Demonstrators shout slogans and light flares during a demonstration against measures to battle the coronavirus pandemic in Vienna.	A group of people holding a banner	Austria	https://www.aljazeera.com/gallery/2021/11/21/photos-pandemic-protests-erupt-over-covid-restrictions-in-austria-italy-croatia
631	aljazeera	images/img_631.jpg	People walk past the parliament as they take part in a demonstration against the country's coronavirus restrictions in Vienna.	A group of people walking with a flag	Austria	https://www.aljazeera.com/gallery/2021/11/21/photos-pandemic-protests-erupt-over-covid-restrictions-in-austria-italy-croatia
632	aljazeera	images/img_632.jpg	Police officers stand in a circle as they check the identity of demonstrators during a rally in Vienna.	A group of people in uniform marching	Austria	https://www.aljazeera.com/gallery/2021/11/21/photos-pandemic-protests-erupt-over-covid-restrictions-in-austria-italy-croatia
633	aljazeera	images/img_633.jpg	People march down a street during a protest against vaccination and coronavirus measures in Zagreb, Croatia	A group of people holding a flag	Croatia	https://www.aljazeera.com/gallery/2021/11/21/photos-pandemic-protests-erupt-over-covid-restrictions-in-austria-italy-croatia
634	aljazeera	images/img_634.jpg	Thousands of protesters gathered in Zagreb after the authorities decided earlier this month to introduce more restrictive measures to fight the surge of coronavirus infections in the country.	A large crowd of people in front of a statue	Croatia	https://www.aljazeera.com/gallery/2021/11/21/photos-pandemic-protests-erupt-over-covid-restrictions-in-austria-italy-croatia
635	aljazeera	images/img_635.jpg	A demonstrator holds a banner reading "No Green Pass, freedom" during a protest at Rome's Circus Maximus	A large crowd of people	Italy	https://www.aljazeera.com/gallery/2021/11/21/photos-pandemic-protests-erupt-over-covid-restrictions-in-austria-italy-croatia
636	aljazeera	images/img_636.jpg	Activists wade through yellow-coloured smoke as they protest against the coronavirus pandemic measures, in the centre of Breda, the Netherlands.	A group of people on a street	Netherlands	https://www.aljazeera.com/gallery/2021/11/21/photos-pandemic-protests-erupt-over-covid-restrictions-in-austria-italy-croatia
637	aljazeera	images/img_637.jpg	A protester holds a sign during demonstrations against COVID measures in Amsterdam, the Netherlands.	A crowd of people walking down a street holding signs	Netherlands	https://www.aljazeera.com/gallery/2021/11/21/photos-pandemic-protests-erupt-over-covid-restrictions-in-austria-italy-croatia
638	aljazeera	images/img_638.jpg	Sudanese protest against the military coup that ousted the government last month in Khartoum.	A group of people with face masks	Sudan	https://www.aljazeera.com/gallery/2021/11/18/thousands-of-anti-coup-protesters-continue-to-march-in-sudan
639	aljazeera	images/img_639.jpg	Sudanese confront the police during the protests in the capital Khartoum.	A group of people walking on a street with a truck in the background	Sudan	https://www.aljazeera.com/gallery/2021/11/18/thousands-of-anti-coup-protesters-continue-to-march-in-sudan
640	aljazeera	images/img_640.jpg	Security forces fired live rounds and tear gas to prevent gatherings and mobile phone communications were cut, witnesses said.	A flag on a pole	Sudan	https://www.aljazeera.com/gallery/2021/11/18/thousands-of-anti-coup-protesters-continue-to-march-in-sudan
641	aljazeera	images/img_641.jpg	Security forces were heavily deployed on main roads and bridges across Khartoum were closed.	A group of people on a street	Sudan	https://www.aljazeera.com/gallery/2021/11/18/thousands-of-anti-coup-protesters-continue-to-march-in-sudan
642	aljazeera	images/img_642.jpg	Police denied using live ammunition and state television announced an investigation into the deaths.	A group of people in a street	Sudan	https://www.aljazeera.com/gallery/2021/11/18/thousands-of-anti-coup-protesters-continue-to-march-in-sudan
643	aljazeera	images/img_643.jpg	The renewed protests came as US Secretary of State Antony Blinken urged Africans to watch out for rising threats to democracy as he began a three-nation tour of the continent in Kenya.	A man holding a sign	Sudan	https://www.aljazeera.com/gallery/2021/11/18/thousands-of-anti-coup-protesters-continue-to-march-in-sudan
644	aljazeera	images/img_644.jpg	The US has suspended some $700m in assistance to Sudan in response to the coup.	A crowd of people holding flags	Sudan	https://www.aljazeera.com/gallery/2021/11/18/thousands-of-anti-coup-protesters-continue-to-march-in-sudan
645	aljazeera	images/img_645.jpg	A firefighter sprays water to extinguish a fire caused by a bomb explosion near the parliament building in Kampala.	A car that has been involved in a accident	Ughanda	https://www.aljazeera.com/gallery/2021/11/16/twin-explosions-rock-ugandas-capital
646	aljazeera	images/img_646.jpg	Two explosions hit Uganda's capital Kampala in what police termed an attack on the city, the latest in a string of blasts in the country.	A firetruck on a street	Ughanda	https://www.aljazeera.com/gallery/2021/11/16/twin-explosions-rock-ugandas-capital
647	aljazeera	images/img_647.jpg	The explosions occurred in the central business district of Kampala near the central police station and the entrance to parliament, police said.	A group of people on fire	Ughanda	https://www.aljazeera.com/gallery/2021/11/16/twin-explosions-rock-ugandas-capital
648	aljazeera	images/img_648.jpg	Members of Uganda People's Defence Force (UPDF) walk near the site of one of the explosions	A group of people in military uniforms	Ughanda	https://www.aljazeera.com/gallery/2021/11/16/twin-explosions-rock-ugandas-capital
649	aljazeera	images/img_649.jpg	Medical staff at Mulago hospital prepare a stretcher to receive victims of a bomb explosion.	A group of people wearing masks and holding a white object	Ughanda	https://www.aljazeera.com/gallery/2021/11/16/twin-explosions-rock-ugandas-capital
650	aljazeera	images/img_650.jpg	Hundreds of police had blocked off the area where thousands of protesters were gathering on Sunday to demand that Saied restore the parliament and normal democratic rule.	A large crowd of people	Tunisia	https://www.aljazeera.com/gallery/2021/11/14/tunisia-96
651	aljazeera	images/img_651.jpg	Increasingly vocal opposition, along with a looming crisis in public finances, may pose a new test of how Saied and the new government he has appointed will tackle threats to their authority.	A crowd of people	Tunisia	https://www.aljazeera.com/gallery/2021/11/14/tunisia-97
652	aljazeera	images/img_652.jpg	Saied sacked the prime minister, suspended parliament and granted himself judicial powers in a July 25 power grab that opponents have termed a coup.	A group of people holding signs and flags	Tunisia	https://www.aljazeera.com/gallery/2021/11/14/tunisia-98
653	aljazeera	images/img_653.jpg	Protesters shout slogans during the demonstration in Tunis.	A group of people holding flags	Tunisia	https://www.aljazeera.com/gallery/2021/11/14/tunisia-99
654	aljazeera	images/img_654.jpg	Tunisian demonstrators scuffle with security forces during the demonstration in front of the parliament.	A group of people in a street	Tunisia	https://www.aljazeera.com/gallery/2021/11/14/tunisia-100
655	aljazeera	images/img_655.jpg	Journalist Elizia Volkmann, reporting from the protests near parliament, said the police have 'completely blocked' the area around the building and have established checkpoints but that there is still a 'slow and steady stream' of people seeking to join the demonstrations	A crowd of people	Tunisia	https://www.aljazeera.com/gallery/2021/11/14/tunisia-101
656	aljazeera	images/img_656.jpg	Sunday’s protest followed clashes last week between police and protesters in the southern town of Agareb in which one person was killed.	A person holding a flag	Tunisia	https://www.aljazeera.com/gallery/2021/11/14/tunisia-102
657	aljazeera	images/img_657.jpg	Azrimah plants a Colona serattifolia sapling, one of the species of fast growing pioneer trees, that provide food for wildlife and eventually form the canopy for the new growth forest.	A child sitting in a chair	Malaysia	https://www.aljazeera.com/gallery/2021/11/12/local-women-grow-rainforests-in-the-malaysian-borneo
658	aljazeera	images/img_658.jpg	Norinah Braim, head of one of the reforestation teams, drives the boat to the plot they are currently working on.	A group of people on a boat	Malaysia	https://www.aljazeera.com/gallery/2021/11/12/local-women-grow-rainforests-in-the-malaysian-borneo
659	aljazeera	images/img_659.jpg	Mahala Maharan selects saplings to be sent for planting.	A person in a hat in a garden	Malaysia	https://www.aljazeera.com/gallery/2021/11/12/local-women-grow-rainforests-in-the-malaysian-borneo
660	aljazeera	images/img_660.jpg	Before planting, the team clears the plot of grasses, bushes and ferns, which grow taller than the women in the tropical humidity.	A group of people with a bicycle in a field	Malaysia	https://www.aljazeera.com/gallery/2021/11/12/local-women-grow-rainforests-in-the-malaysian-borneo
661	aljazeera	images/img_661.jpg	Azrimah carries tree saplings in a basket from the boat to the planting site.	A man carrying a blue bag	Malaysia	https://www.aljazeera.com/gallery/2021/11/12/local-women-grow-rainforests-in-the-malaysian-borneo
662	aljazeera	images/img_662.jpg	Jong digs holes for her colleagues to plant the tree saplings.	A man in a white helmet and blue overalls in the woods	Malaysia	https://www.aljazeera.com/gallery/2021/11/12/local-women-grow-rainforests-in-the-malaysian-borneo
663	aljazeera	images/img_663.jpg	Masrita Takshi plants a tropical almond tree (Terminalia Catappa) on a plot that was donated by an oil palm plantation to make a forest corridor connecting two protected rainforests	A child in a hat squatting in the grass	Malaysia	https://www.aljazeera.com/gallery/2021/11/12/local-women-grow-rainforests-in-the-malaysian-borneo
664	aljazeera	images/img_664.jpg	Nadia Jolirwan and Christine Ayun relax in hammocks tied to the trees they planted.	Two people sitting on a bench in the woods	Malaysia	https://www.aljazeera.com/gallery/2021/11/12/local-women-grow-rainforests-in-the-malaysian-borneo
665	aljazeera	images/img_665.jpg	Ozidah Sawang measures the growth of a tree, as part of the periodical survey HUTAN does on their research plots.	A man holding a bow and arrow	Malaysia	https://www.aljazeera.com/gallery/2021/11/12/local-women-grow-rainforests-in-the-malaysian-borneo
666	aljazeera	images/img_666.jpg	Mariana and her team walk downhill on a steep portion of road where the van was unable to descend with all the passengers inside.	A group of people hiking	Malaysia	https://www.aljazeera.com/gallery/2021/11/12/local-women-grow-rainforests-in-the-malaysian-borneo
667	aljazeera	images/img_667.jpg	Hindu devotees perform rituals in Yamuna river, covered by chemical foam caused by industrial and domestic pollution, during Chhath Puja festival.	A person and a child in the snow	India	https://www.aljazeera.com/gallery/2021/11/11/india-hindus-yamuna-river-pollution-chhath-puja
668	aljazeera	images/img_668.jpg	A vast stretch of one of India's most sacred rivers, the Yamuna, is covered with toxic foam, caused partly by high pollutants discharged from industries encircling the capital New Delhi.	A person taking a picture of another woman in a snowy place	India	https://www.aljazeera.com/gallery/2021/11/11/india-hindus-yamuna-river-pollution-chhath-puja
669	aljazeera	images/img_669.jpg	The river has become dirtier over the years as most of the capital's sewage, farm pesticides from neighbouring states and industrial effluents from factory towns flow into the waterway despite laws against polluting.	A person standing in a snowy area	India	https://www.aljazeera.com/gallery/2021/11/11/india-hindus-yamuna-river-pollution-chhath-puja
670	aljazeera	images/img_670.jpg	A man rows a boat in Yamuna River.	A group of people on a boat in a river	India	https://www.aljazeera.com/gallery/2021/11/11/india-hindus-yamuna-river-pollution-chhath-puja
671	aljazeera	images/img_671.jpg	Hindu devotees perform rituals on the banks of Yamuna river.	A group of people on a beach	India	https://www.aljazeera.com/gallery/2021/11/11/india-hindus-yamuna-river-pollution-chhath-puja
672	aljazeera	images/img_672.jpg	A Sudanese mother sits with her children at a shelter in the al-Qanaa village in Sudan's southern White Nile state	A person holding a baby	South Sudan	https://www.aljazeera.com/gallery/2021/9/23/photos-south-sudanese-refugees-homeless-again-after-sudan-floods
673	aljazeera	images/img_673.jpg	Nearly 50 villages have been submerged in southern Sudan, displacing some 65,000 people including South Sudanese refugees whose camp was inundated, the UN said in a report last week.	A person standing next to a rock structure	South Sudan	https://www.aljazeera.com/gallery/2021/9/23/photos-south-sudanese-refugees-homeless-again-after-sudan-floods
674	aljazeera	images/img_674.jpg	A person standing next to a rock structure	A person standing in a swamp	South Sudan	https://www.aljazeera.com/gallery/2021/9/23/photos-south-sudanese-refugees-homeless-again-after-sudan-floods
675	aljazeera	images/img_675.jpg	Sudanese children stand in flood waters in al-Qanaa village	A group of people standing in water	South Sudan	https://www.aljazeera.com/gallery/2021/9/23/photos-south-sudanese-refugees-homeless-again-after-sudan-floods
676	aljazeera	images/img_676.jpg	A South Sudanese refugee inspects a house, damaged by floods, in al-Qanaa village.	A man standing on a rock in the water	South Sudan	https://www.aljazeera.com/gallery/2021/9/23/photos-south-sudanese-refugees-homeless-again-after-sudan-floods
677	aljazeera	images/img_677.jpg	A Sudanese, right, and a South Sudanese refugee stand in floodwaters in al-Qanaa.	Two men standing in water	South Sudan	https://www.aljazeera.com/gallery/2021/9/23/photos-south-sudanese-refugees-homeless-again-after-sudan-floods
678	aljazeera	images/img_678.jpg	South Sudanese refugees rebuild their huts in a dry area at a refugee camp that was inundated by floods in al-Qanaa.	A group of people in clothing	South Sudan	https://www.aljazeera.com/gallery/2021/9/23/photos-south-sudanese-refugees-homeless-again-after-sudan-floods
679	aljazeera	images/img_679.jpg	The 13-day fair coincides with several auspicious days in the Hindu calendar, adding to the crowds thronging the revered lakeside city.	A person with a group of camels	India	https://www.aljazeera.com/gallery/2021/11/10/india-pushkar-camel-fair-rajasthan-covid
680	aljazeera	images/img_680.jpg	The gathering sees traditional camel breeding communities trek sometimes hundreds of kilometres from their remote villages to trade their animals.	A group of people standing around a camel	India	https://www.aljazeera.com/gallery/2021/11/10/india-pushkar-camel-fair-rajasthan-covid
681	aljazeera	images/img_681.jpg	Pushkar typically attracts thousands of Hindu pilgrims, cattle traders and herders for the annual event, which was called off in 2020 because of the coronavirus pandemic.	A group of people sitting in a field with animals in the background	India	https://www.aljazeera.com/gallery/2021/11/10/india-pushkar-camel-fair-rajasthan-covid
682	aljazeera	images/img_682.jpg	An Afghan boy walks through the Dashtan village of Balkh province.	A person walking on a path between large rocks	Afghanistan	https://www.aljazeera.com/gallery/2021/11/9/photos-taliban-rule-peace-rural-afghanistan-farmers
683	aljazeera	images/img_683.jpg	Afghan women and children rest after harvesting cotton in a field in Dawlatabad district.	A group of people in clothing	Afghanistan	https://www.aljazeera.com/gallery/2021/11/9/photos-taliban-rule-peace-rural-afghanistan-farmers
684	aljazeera	images/img_684.jpg	An Afghan farmer uses a shovel to plough a field at Dawlatabad District.	A person shoveling dirt in front of a herd of elephants	Afghanistan	https://www.aljazeera.com/gallery/2021/11/9/photos-taliban-rule-peace-rural-afghanistan-farmers
685	aljazeera	images/img_685.jpg	Afghan women and children engage harvest cotton in a field at Dawlatabad District.	A group of people picking flowers	Afghanistan	https://www.aljazeera.com/gallery/2021/11/9/photos-taliban-rule-peace-rural-afghanistan-farmers
686	aljazeera	images/img_686.jpg	Maky, 72, sorts cotton outside her house in Dashtan village.	A man kneeling down next to a pile of flowers	Afghanistan	https://www.aljazeera.com/gallery/2021/11/9/photos-taliban-rule-peace-rural-afghanistan-farmers
687	aljazeera	images/img_687.jpg	Afghan village elder Hajifat Khan at his house in Dashtan village.	A man with a white beard and a turban in a stone building	Afghanistan	https://www.aljazeera.com/gallery/2021/11/9/photos-taliban-rule-peace-rural-afghanistan-farmers
688	aljazeera	images/img_678.jpg	Noor Mohammad Sedaqat stands in front of his mud-house in Yakatut, Hazrati Sultan district of Samangan province.	A person standing outside a house	Afghanistan	https://www.aljazeera.com/gallery/2021/11/9/photos-taliban-rule-peace-rural-afghanistan-farmers
689	aljazeera	images/img_679.jpg	Afghan children play inside the courtyard of their house in Dashtan village of Balkh province.	A group of people walking around a building under construction	Afghanistan	https://www.aljazeera.com/gallery/2021/11/9/photos-taliban-rule-peace-rural-afghanistan-farmers
690	aljazeera	images/img_690.jpg	These scars on my body are always there to remind me of what I went through.	A man holding a piece of paper	Iraq	https://www.aljazeera.com/gallery/2021/11/8/yazidi-survivors-of-sexual-violence-awaiting-reparations
691	aljazeera	images/img_691.jpg	Many of the Yazidis who were held captive between 2014 and 2017 faced torture, forced conscription, rape and other abuses at the hands of ISIL	A person carrying a child on the back	Iraq	https://www.aljazeera.com/news/2020/7/30/yazidi-children-left-alone-to-deal-with-isil-captivity-trauma
692	aljazeera	images/img_692.jpg	Taliban member Osama, (left), helping its leader Abu Do Jana apply bandages to his knuckles ahead of a buzkashi game.	A couple of men in clothing	Afghanistan	https://www.aljazeera.com/gallery/2021/11/3/photos-taliban-afghanistan-culture-buzkashi-season
693	aljazeera	images/img_693.jpg	A man cheering with his loudspeaker during the buzkashi game.	A man holding a megaphone in front of a crowd of people	Afghanistan	https://www.aljazeera.com/gallery/2021/11/3/photos-taliban-afghanistan-culture-buzkashi-season
694	aljazeera	images/img_694.jpg	Taliban fighters sitting on the back of a vehicle as they watch the buzkashi game.	A group of people posing for a photo	Afghanistan	https://www.aljazeera.com/gallery/2021/11/3/photos-taliban-afghanistan-culture-buzkashi-season
695	aljazeera	images/img_695.jpg	Naresh Chauhan, 50, and his wife Rina Devi, 45, fill sacks with coal in Dhanbad, an eastern Indian city in Jharkhand state.	A few people working in a field	India	https://www.aljazeera.com/gallery/2021/11/1/photos-climate-crisis-saved-by-coal-far-from-cop26-another-reality-in-india
696	aljazeera	images/img_696.jpg	An Indian worker smiles as she takes a break from loading coal into a truck in Dhanbad.	A person carrying a child	India	https://www.aljazeera.com/gallery/2021/11/1/photos-climate-crisis-saved-by-coal-far-from-cop26-another-reality-in-india
697	aljazeera	images/img_697.jpg	Workers load coal into a truck in Dhanbad.	A group of people standing on a rocky area	India	https://www.aljazeera.com/gallery/2021/11/1/photos-climate-crisis-saved-by-coal-far-from-cop26-another-reality-in-india
698	aljazeera	images/img_698.jpg	Labourers load coal onto trucks for transportation near Dhanbad.	A group of people outside	India	https://www.aljazeera.com/gallery/2021/11/1/photos-climate-crisis-saved-by-coal-far-from-cop26-another-reality-in-india
699	aljazeera	images/img_699.jpg	A worker poses for a photograph while taking a break from loading coal into a truck.	A man with a red hat	India	https://www.aljazeera.com/gallery/2021/11/1/photos-climate-crisis-saved-by-coal-far-from-cop26-another-reality-in-india
700	aljazeera	images/img_700.jpg	A man climbs a steep ridge with a basket of coal scavenged from a mine near Dhanbad.	A turtle on a rock	India	https://www.aljazeera.com/gallery/2021/11/1/photos-climate-crisis-saved-by-coal-far-from-cop26-another-reality-in-india
701	aljazeera	images/img_701.jpg	A young woman carries a basket of coal scavenged from a mine.	A child holding a basket	India	https://www.aljazeera.com/gallery/2021/11/1/photos-climate-crisis-saved-by-coal-far-from-cop26-another-reality-in-india
702	aljazeera	images/img_702.jpg	Murti Devi, who scavenges coal for living, prepares a hearth fuelled by coal at a village near Dhanbad.	A person sitting on a roof	India	https://www.aljazeera.com/gallery/2021/11/1/photos-climate-crisis-saved-by-coal-far-from-cop26-another-reality-in-india
703	aljazeera	images/img_703.jpg	Members of coal workers' community fetch drinking water from a pipe at a coal depot near an open-cast mine in Dhanbad.	A group of people fetching water	India	https://www.aljazeera.com/gallery/2021/11/1/photos-climate-crisis-saved-by-coal-far-from-cop26-another-reality-in-india
704	aljazeera	images/img_704.jpg	Banana farmer Jose Alvaro Leon Diaz rests with his dogs at the end of a day spent trying to salvage his crop from the ashfall.	A man sitting on a rock with two sheep	Spain	https://www.aljazeera.com/gallery/2021/10/24/spain-living-through-an-active-volcanic-eruption-on-la-palma
705	aljazeera	images/img_705.jpg	Manuel Pino stands by his electronics store after clearing the overnight ash.	A person with a camera and a cane on a sidewalk	Spain	https://www.aljazeera.com/gallery/2021/10/24/spain-living-through-an-active-volcanic-eruption-on-la-palma
706	aljazeera	images/img_706.jpg	A child standing on a dry land in Bala Murghab district of Badghis province.	A child standing in a rocky area	Afghanistan	https://www.aljazeera.com/gallery/2021/10/26/photos-afghanistan-climate-change-farmers-cop26-agriculture
707	aljazeera	images/img_707.jpg	A man loading a donkey with jerrycans filled with water at the Jar-e-Sakhi Internally Displaced People (IDP) camp in Qala e Naw district of Badghis province.	A group of people with a donkey	Afghanistan	https://www.aljazeera.com/gallery/2021/10/26/photos-afghanistan-climate-change-farmers-cop26-agriculture
708	aljazeera	images/img_708.jpg	A young man plowing a dry land in Bala Murghab district.	A man walking with two white cows	Afghanistan	https://www.aljazeera.com/gallery/2021/10/26/photos-afghanistan-climate-change-farmers-cop26-agriculture
709	aljazeera	images/img_709.jpg	Children washing clothes in Bala Murghab district of Badghis province.	A group of people in a muddy area	Afghanistan	https://www.aljazeera.com/gallery/2021/10/26/photos-afghanistan-climate-change-farmers-cop26-agriculture
710	aljazeera	images/img_710.jpg	An Afghan family standing by their mud brick home in village Haji Rashid Khan in Bala Murghab district.	A group of people sitting on the ground in front of a rock building	Afghanistan	https://www.aljazeera.com/gallery/2021/10/26/photos-afghanistan-climate-change-farmers-cop26-agriculture
711	aljazeera	images/img_711.jpg	A group of people sitting on the ground in front of a rock building	A group of people sitting on the ground in front of a rock building	Afghanistan	https://www.aljazeera.com/gallery/2021/10/26/photos-afghanistan-climate-change-farmers-cop26-agriculture
712	aljazeera	images/img_712.jpg	Medical staff position a patient on a bed in a COVID-19 isolation room at the University Emergency Hospital in Bucharest.	A couple of surgeons performing surgery	Romania	https://www.aljazeera.com/gallery/2021/10/24/romania-revives-covid-19-restrictions-as-hospitals-struggle
713	aljazeera	images/img_713.jpg	Earlier this month, Romanian doctors issued an open letter to Romanians titled 'a cry of despair' to highlight the plight they face and urged people to get vaccinated.	A person in a hospital gown	Romania	https://www.aljazeera.com/gallery/2021/10/24/romania-revives-covid-19-restrictions-as-hospitals-struggle
714	aljazeera	images/img_714.jpg	Dr Petruta Filip (R) and a colleague place an oxygen mask on a man in the COVID-19 section at the University Emergency Hospital.	A group of doctors attending to a patient	Romania	https://www.aljazeera.com/gallery/2021/10/24/romania-revives-covid-19-restrictions-as-hospitals-struggle
715	aljazeera	images/img_715.jpg	A patient breathes through an oxygen mask in a COVID-19 isolation room at the University Emergency Hospital.	A person in a mask	Romania	https://www.aljazeera.com/gallery/2021/10/24/romania-revives-covid-19-restrictions-as-hospitals-struggle
716	aljazeera	images/img_716.jpg	Paramedics push a stretcher as they bring a patient to the University Emergency Hospital.	A person pushing a baby in a stroller	Romania	https://www.aljazeera.com/gallery/2021/10/24/romania-revives-covid-19-restrictions-as-hospitals-struggle
717	aljazeera	images/img_717.jpg	A medical staff member walks by vaccination booths in Bucharest as the country started a 'vaccination marathon' with several centres remaining open for 72 hours, hoping to energise the failed vaccination campaign.	A man wearing a mask	Romania	https://www.aljazeera.com/gallery/2021/10/24/romania-revives-covid-19-restrictions-as-hospitals-struggle
718	aljazeera	images/img_718.jpg	The coastguard conducts a rescue operation on a rubber boat in the town of Santa Teresita, Cagayan province, Philippines.	A group of people in a canoe	Philippines	https://www.aljazeera.com/gallery/2021/10/13/typhoon-kompasu-tropical-storm-leaves-11-dead-in-landslides-floods-in-philippines
719	aljazeera	images/img_719.jpg	Rescuers carry a child along a river swollen with heavy rains from Tropical Storm Kompasu in Gonzaga, northern Philippines.	A group of people wearing orange vests and holding a rope	Philippines	https://www.aljazeera.com/gallery/2021/10/13/typhoon-kompasu-tropical-storm-leaves-11-dead-in-landslides-floods-in-philippines
720	aljazeera	images/img_720.jpg	Rescuers search for victims in a house buried by a landslide caused by Tropical Storm Kompasu in Baguio.	A group of people standing around a roof	Philippines	https://www.aljazeera.com/gallery/2021/10/13/typhoon-kompasu-tropical-storm-leaves-11-dead-in-landslides-floods-in-philippines
721	aljazeera	images/img_721.jpg	Rescuers carry the body of a victim who was caught in a landslide caused by Tropical Storm Kompasu in Baguio.	A group of people in protective gear	Philippines	https://www.aljazeera.com/gallery/2021/10/13/typhoon-kompasu-tropical-storm-leaves-11-dead-in-landslides-floods-in-philippines
722	aljazeera	images/img_722.jpg	Demonstrators celebrate taking control of La Paz's coca market after a confrontation with police.	A group of people on a building	Bolivia	https://www.aljazeera.com/gallery/2021/10/5/photos-bolivian-coca-leaf-growers-storm-market-after-week-long-dispute
723	aljazeera	images/img_723.jpg	Police fire tear gas to disperse anti-government coca farmers during clashes near the coca market in La Paz.	Two people in military uniforms holding guns	Bolivia	https://www.aljazeera.com/gallery/2021/10/5/photos-bolivian-coca-leaf-growers-storm-market-after-week-long-dispute
724	aljazeera	images/img_724.jpg	A demonstrator throws a tear gas canister back at police during the protest for control of La Paz's coca market.	A person in a garment running through water	Bolivia	https://www.aljazeera.com/gallery/2021/10/5/photos-bolivian-coca-leaf-growers-storm-market-after-week-long-dispute
725	aljazeera	images/img_725.jpg	Riot police run in a cloud of tear gas during clashes with coca farmers near the coca market in La Paz.	A group of people in black uniforms	Bolivia	https://www.aljazeera.com/gallery/2021/10/5/photos-bolivian-coca-leaf-growers-storm-market-after-week-long-dispute
726	aljazeera	images/img_726.jpg	The anti-government coca farmers retook control of the coca market by force after more than two weeks of violent protests in a dispute for the leadership of their association.	A group of people standing in front of a burning building	Bolivia	https://www.aljazeera.com/gallery/2021/10/5/photos-bolivian-coca-leaf-growers-storm-market-after-week-long-dispute
727	aljazeera	images/img_727.jpg	Coca growers from Bolivia's Yungas region after seizing control of a coca market in La Paz.	A group of people holding their hands up	Bolivia	https://www.aljazeera.com/gallery/2021/10/5/photos-bolivian-coca-leaf-growers-storm-market-after-week-long-dispute
728	aljazeera	images/img_728.jpg	Demonstrators celebrate taking control of La Paz's coca market.	A group of people standing around a fire	Bolivia	https://www.aljazeera.com/gallery/2021/10/5/photos-bolivian-coca-leaf-growers-storm-market-after-week-long-dispute
729	aljazeera	images/img_729.jpg	Afghans gather outside the passport office in Kabul.	A group of people holding papers	Afghanistan	https://www.aljazeera.com/gallery/2021/10/6/photos-kabul-afghanistan-hundreds-throng-passport-office-in-afghan-capital
730	aljazeera	images/img_730.jpg	The crowd pressed against a large concrete barrier, trying to hand documents to an official who stood atop it.	A man standing on a ledge with a crowd watching	Afghanistan	https://www.aljazeera.com/gallery/2021/10/6/photos-kabul-afghanistan-hundreds-throng-passport-office-in-afghan-capital
731	aljazeera	images/img_731.jpg	Afghans queue outside a government passport office.	A group of men standing outside	Afghanistan	https://www.aljazeera.com/gallery/2021/10/6/photos-kabul-afghanistan-hundreds-throng-passport-office-in-afghan-capital
732	aljazeera	images/img_732.jpg	Amina braids her granddaughter's hair in the compound of the central mosque in Bambari, while her daughter prepares food a few metres away.	A person and a child sitting on the ground	Central African Republic	https://www.aljazeera.com/gallery/2021/10/5/photos-central-african-republic-bambari-nzacko-two-mirrors-of-the-crisis-in-car
733	aljazeera	images/img_733.jpg	Forty-year-old Hawa has nine children and they all sleep together in a corner of the classroom inside a mosque in Bambari.	A group of children sitting on the ground in front of a brick building	Central African Republic	https://www.aljazeera.com/gallery/2021/10/5/photos-central-african-republic-bambari-nzacko-two-mirrors-of-the-crisis-in-car
734	aljazeera	images/img_734.jpg	The conflict in CAR has forced more than 1.4 million people of a population of less than five million to flee their homes, while essential health services are extremely limited.	A group of people in a village	Central African Republic	https://www.aljazeera.com/gallery/2021/10/5/photos-central-african-republic-bambari-nzacko-two-mirrors-of-the-crisis-in-car
735	aljazeera	images/img_735.jpg	Since the escalation of the conflict in December, cases of severe acute malnutrition among children under five in the CAR have increased by 16 percent compared to the same period in 2020.	A group of boys walking on a dirt road	Central African Republic	https://www.aljazeera.com/gallery/2021/3/18/families-forced-into-a-deadly-spiral-in-central-african-republic
736	aljazeera	images/img_736.jpg	Even before the most recent displacement crisis, nearly 1.3 million people were displaced in the country or across its borders.	A man carrying a child with Kasubi Tombs in the background	Central African Republic	https://www.aljazeera.com/gallery/2021/3/18/families-forced-into-a-deadly-spiral-in-central-african-republic
737	aljazeera	images/img_737.jpg	The lack of food assistance forces women and men to venture into the bush to find something to eat or wood to sell - putting themselves at risk of attacks from armed groups or other communities. "I was fetching fruit outside the camp when a shepherd hit me with his blade.	A man holding a snake	Central African Republic	https://www.aljazeera.com/gallery/2021/3/18/families-forced-into-a-deadly-spiral-in-central-african-republic
738	aljazeera	images/img_738.jpg	Following numerous incursions by armed groups into villages since December, more than 100,000 people found temporary refuge in fields and forests near their towns, which they consider safer.	A group of people sitting on the ground outside	Central African Republic	https://www.aljazeera.com/gallery/2021/3/18/families-forced-into-a-deadly-spiral-in-central-african-republic
739	aljazeera	images/img_739.jpg	Humanitarian organisations are concerned by the alarming increase in displacement in the CAR since December.	A baby looking at the camera	Central African Republic	https://www.aljazeera.com/gallery/2021/3/18/families-forced-into-a-deadly-spiral-in-central-african-republic
740	aljazeera	images/img_740.jpg	A conflict erupted in the CAR in 2013 between the rival Seleka and Anti-balaka armed groups.	A group of people outside	Central African Republic	https://www.aljazeera.com/gallery/2021/3/18/families-forced-into-a-deadly-spiral-in-central-african-republic
741	aljazeera	images/img_741.jpg	Philomène is one of those who were displaced well before the latest surge of violence. It has been nearly six years since armed men attacked her village.	A young girl with her hand on her face	Central African Republic	https://www.aljazeera.com/gallery/2021/3/18/families-forced-into-a-deadly-spiral-in-central-african-republic
742	aljazeera	images/img_742.jpg	Dadji is a young displaced mother. She and her new-born child live in fear of attacks.	A person holding a baby	Central African Republic	https://www.aljazeera.com/gallery/2021/3/18/families-forced-into-a-deadly-spiral-in-central-african-republic
743	aljazeera	images/img_743.jpg	Shia pilgrims gather between the holy shrines of Imam Hussein and Imam Abbas for the Arbaeen festival in Karbala.	A person with the hands up in the air in front of a crowd	Iraq	https://www.aljazeera.com/gallery/2021/9/29/in-pictures-iraq-shia-muslim-pilgrims-commemorate-arbaeen-in-karbala
744	aljazeera	images/img_744.jpg	Shia Muslim worshippers gather inside the holy shrine of Imam Hussein.	A large crowd of people	Iraq	https://www.aljazeera.com/gallery/2021/9/29/in-pictures-iraq-shia-muslim-pilgrims-commemorate-arbaeen-in-karbala
745	aljazeera	images/img_745.jpg	Shia Muslim worshippers gather inside the holy shrine of Imam Hussein.	A crowd of people	Iraq	https://www.aljazeera.com/gallery/2021/9/29/in-pictures-iraq-shia-muslim-pilgrims-commemorate-arbaeen-in-karbala
746	aljazeera	images/img_746.jpg	Worshippers gather inside the holy shrine of Imam Abbas, also in Karbala.	A crowd of people in front of a stage with a colorful wall	Iraq	https://www.aljazeera.com/gallery/2021/9/29/in-pictures-iraq-shia-muslim-pilgrims-commemorate-arbaeen-in-karbala
747	aljazeera	images/img_747.jpg	The pilgrims arrived in Karbala from Baghdad, Basra and other parts of the Shia Muslim world, most of them walking long distances as part of the pilgrimage.	A large crowd of people in front of a stage with a large gold dome and red lights	Iraq	https://www.aljazeera.com/gallery/2021/9/29/in-pictures-iraq-shia-muslim-pilgrims-commemorate-arbaeen-in-karbala
748	aljazeera	images/img_748.jpg	Shia Muslim worshippers leave after the end of the Arbaeen Shia festival, in Karbala.	People on a truck	Iraq	https://www.aljazeera.com/gallery/2021/9/29/in-pictures-iraq-shia-muslim-pilgrims-commemorate-arbaeen-in-karbala
749	aljazeera	images/img_749.jpg	Iraqis voters gather to cast their vote at a ballot station in Baghdad.	A group of people in a room	Iraq	https://www.aljazeera.com/gallery/2021/10/10/photos-iraq-iraqis-vote-for-new-parliament-amid-tight-security
750	aljazeera	images/img_750.jpg	An Iraqi woman registers before casting her vote at a polling station in Baghdad.	A group of people in a room	Iraq	https://www.aljazeera.com/gallery/2021/10/10/photos-iraq-iraqis-vote-for-new-parliament-amid-tight-security
751	aljazeera	images/img_751.jpg	An Iraqi woman shows her ink-stained finger after casting her vote at a polling station in the Sadr city district of Baghdad.	A man with purple nail polish	Iraq	https://www.aljazeera.com/gallery/2021/10/10/photos-iraq-iraqis-vote-for-new-parliament-amid-tight-security
752	aljazeera	images/img_752.jpg	Voters stand in line at a polling station in Duhok.	A group of people in clothing	Iraq	https://www.aljazeera.com/gallery/2021/10/10/photos-iraq-iraqis-vote-for-new-parliament-amid-tight-security
753	aljazeera	images/img_753.jpg	Members of the Iraqi security forces patrol in the streets of Tikrit, north of the capital Baghdad.	A row of military vehicles	Iraq	https://www.aljazeera.com/gallery/2021/10/10/photos-iraq-iraqis-vote-for-new-parliament-amid-tight-security
754	aljazeera	images/img_754.jpg	A nun votes at a polling station during the parliamentary election, in Qaraqosh near Mosul.	A doctor examining a patient	Iraq	https://www.aljazeera.com/gallery/2021/10/10/photos-iraq-iraqis-vote-for-new-parliament-amid-tight-security
755	aljazeera	images/img_755.jpg	An Iraqi man holds a ballot paper during the legislative elections in Sadr City, Baghdad.	A man in a white coat	Iraq	https://www.aljazeera.com/gallery/2021/10/10/photos-iraq-iraqis-vote-for-new-parliament-amid-tight-security
756	aljazeera	images/img_756.jpg	Children attend lessons at their orphanage in Kabul.	A group of children in a classroom	Afghanistan	https://www.aljazeera.com/gallery/2021/10/19/afghanistan-kabul-orphanage-children-cash-crisis-taliban
757	aljazeera	images/img_757.jpg	A child holding a doll.	A person holding a baby	Afghanistan	https://www.aljazeera.com/gallery/2021/10/19/afghanistan-kabul-orphanage-children-cash-crisis-taliban
758	aljazeera	images/img_758.jpg	Girls attend lessons at their orphanage in Kabul.	A group of women sitting at a table	Afghanistan	https://www.aljazeera.com/gallery/2021/10/19/afghanistan-kabul-orphanage-children-cash-crisis-taliban
759	aljazeera	images/img_759.jpg	Ahmad Khalil Mayan, 40, the director of the orphanage, reviews school notes with a girl.	A person sitting at a table writing on a piece of paper	Afghanistan	https://www.aljazeera.com/gallery/2021/10/19/afghanistan-kabul-orphanage-children-cash-crisis-taliban
760	aljazeera	images/img_760.jpg	Golshan, a childcare worker, gets the children ready for school.	A group of people in a room	Afghanistan	https://www.aljazeera.com/gallery/2021/10/19/afghanistan-kabul-orphanage-children-cash-crisis-taliban
761	aljazeera	images/img_761.jpg	Children get ready for school inside their room at the orphanage in Kabul.	A group of people in a room	Afghanistan	https://www.aljazeera.com/gallery/2021/10/19/afghanistan-kabul-orphanage-children-cash-crisis-taliban
762	aljazeera	images/img_762.jpg	Children from the orphanage walk to the school bus.	A group of people walking on a road	Afghanistan	https://www.aljazeera.com/gallery/2021/10/19/afghanistan-kabul-orphanage-children-cash-crisis-taliban
763	aljazeera	images/img_763.jpg	A childcare worker at the orphanage, serves the children tea and bread for breakfast.	A group of people sitting around a table with food	Afghanistan	https://www.aljazeera.com/gallery/2021/10/19/afghanistan-kabul-orphanage-children-cash-crisis-taliban
764	aljazeera	images/img_764.jpg	Children play with friends at the orphanage after school.	A man and woman on a swing	Afghanistan	https://www.aljazeera.com/gallery/2021/10/19/afghanistan-kabul-orphanage-children-cash-crisis-taliban
765	aljazeera	images/img_765.jpg	The orphanage has operated for more than a decade, and provides shelter for those who have lost both parents or just one who cannot afford to keep them.	Two women walking in a street	Afghanistan	https://www.aljazeera.com/gallery/2021/10/19/afghanistan-kabul-orphanage-children-cash-crisis-taliban
766	aljazeera	images/img_766.jpg	Rescue workers carry the body of a victim after recovering it from the debris of a residential house following a landslide caused by heavy rainfall at Kokkayar village in Idukki district in the southern state of Kerala.	A group of people in orange jackets	India	https://www.aljazeera.com/gallery/2021/10/18/pictures-india-kerala-landslides-floods
767	aljazeera	images/img_767.jpg	Rescue workers push a overturned vehicle stuck in the mud and debris at a site of a landslide claimed to be caused by heavy rains in Kokkayar, Kerala.	Men working on a pile of wood	India	https://www.aljazeera.com/gallery/2021/10/18/pictures-india-kerala-landslides-floods
768	aljazeera	images/img_768.jpg	Rescue workers carry a body of a victim at the site of a landslide caused by heavy rains in Kokkaya.	A group of people wearing orange shirts	India	https://www.aljazeera.com/gallery/2021/10/18/pictures-india-kerala-landslides-floods
769	aljazeera	images/img_769.jpg	A resident carries a dog amid the debris of his damaged house after flash floods caused by heavy rains at Thodupuzha.	A person sitting on a chair outside	India	https://www.aljazeera.com/gallery/2021/10/18/pictures-india-kerala-landslides-floods
770	aljazeera	images/img_770.jpg	The Indian army, navy and air force are assisting with flood relief and rescue operations.	A man sitting on a bench	India	https://www.aljazeera.com/gallery/2021/10/18/pictures-india-kerala-landslides-floods
771	aljazeera	images/img_771.jpg	The India Meteorological Department said the heavy rains, caused by a low pressure area over the southeastern Arabian Sea and Kerala, were expected to ease.	A person walking with an umbrella and cows	India	https://www.aljazeera.com/gallery/2021/10/18/pictures-india-kerala-landslides-floods
772	aljazeera	images/img_772.jpg	Visitors watch the airshow during the 13th China International Aviation and Aerospace Exhibition in Zhuhai.	A crowd of people holding umbrellas	China	https://www.aljazeera.com/gallery/2021/9/28/china-shows-off-new-drones-and-jets-at-zhuhai-airshow
773	aljazeera	images/img_773.jpg	Visitors stand near a CM-401 anti-ship missile weapon system displayed at Airshow China.	A person taking pictures of an airplane	China	https://www.aljazeera.com/gallery/2021/9/28/china-shows-off-new-drones-and-jets-at-zhuhai-airshow
774	aljazeera	images/img_774.jpg	Visitors look at a KJ-500 early warning aircraft.	A large airplane on display	China	https://www.aljazeera.com/gallery/2021/9/28/china-shows-off-new-drones-and-jets-at-zhuhai-airshow
775	aljazeera	images/img_775.jpg	A woman raises a fist as she reacts outside the Glynn County Courthouse after the jury reached a guilty verdict in the trial of William 'Roddie' Bryan, Travis McMichael and Gregory McMichael	A group of people holding their hands up	USA	https://www.aljazeera.com/news/2021/11/24/jury-delivers-guilty-verdicts-in-killing-of-ahmaud-arbery
776	aljazeera	images/img_776.jpg	People react after the jury reached a guilty verdict in the trial of the men charged in the killing of Ahmaud Arbery	A group of people raising their hands	USA	https://www.aljazeera.com/news/2021/11/24/jury-delivers-guilty-verdicts-in-killing-of-ahmaud-arbery
777	aljazeera	images/img_777.jpg	A worker inside the Nilgrar tunnel in the Baltal area, northeast of Srinagar, Indian-administered Kashmir.	A person in a helmet	India	https://www.aljazeera.com/gallery/2021/10/4/photos-india-strategic-tunnel-project-kashmir-ladakh
778	aljazeera	images/img_778.jpg	Nikhil Kumar, wearing a blue helmet, helps other workers to fix an iron rod as they prepare a machine for rock bolting at the entrance to the Nilgrar tunnel.	A group of men working on a machine	India	https://www.aljazeera.com/gallery/2021/10/4/photos-india-strategic-tunnel-project-kashmir-ladakh
779	aljazeera	images/img_779.jpg	Excavators work to clear rocks and boulders at the entrance of the tunnel.	A few men working on a construction site	India	https://www.aljazeera.com/gallery/2021/10/4/photos-india-strategic-tunnel-project-kashmir-ladakh
780	aljazeera	images/img_780.jpg	A drilling machine operator is covered with dust at the entrance to the Nilgrar tunnel.	A man wearing a mask	India	https://www.aljazeera.com/gallery/2021/10/4/photos-india-strategic-tunnel-project-kashmir-ladakh
781	aljazeera	images/img_781.jpg	The ambitious project to drill tunnels and construct bridges aims to connect the Kashmir Valley with Ladakh, a cold, desert region isolated for half of the year because of massive snowfall.	A few men working in a mine	India	https://www.aljazeera.com/gallery/2021/10/4/photos-india-strategic-tunnel-project-kashmir-ladakh
782	aljazeera	images/img_782.jpg	The $932m project’s last tunnel will bypass the challenging Zojila pass and connect Sonamarg with Ladakh. Officials say it will be India’s longest and highest tunnel at 11,500 feet	Men in yellow hard hats working on a machine	India	https://www.aljazeera.com/gallery/2021/10/4/photos-india-strategic-tunnel-project-kashmir-ladakh
783	aljazeera	images/img_783.jpg	Indian military planners view the tunnel project as extremely important for Ladakh. Experts say it will provide logistics flexibility to the military and give it operational and strategic mobility.	A group of people standing in a tunnel	India	https://www.aljazeera.com/gallery/2021/10/4/photos-india-strategic-tunnel-project-kashmir-ladakh
784	aljazeera	images/img_784.jpg	The Zojila part of the tunnel is to be functional in 2026, but India's road transport and highways minister, Nitin Gadkari, said on a visit to the project site on Tuesday that he hopes the work will be finished before a 2024 general election.	A firefighter on a ladder	India	https://www.aljazeera.com/gallery/2021/10/4/photos-india-strategic-tunnel-project-kashmir-ladakh
785	aljazeera	images/img_785.jpg	Indian transport minister Nitin Gadkari, centre, accompanied by his wife, looks at the Zojila tunnel in Baltal, northeast of Srinagar	Vijay Kumar Singh et al. standing together	India	https://www.aljazeera.com/gallery/2021/10/4/photos-india-strategic-tunnel-project-kashmir-ladakh
786	aljazeera	images/img_786.jpg	Samia Suluhu Hassan has sought to break away from some of Magufuli's policies	Samia Suluhu wearing glasses and a headset	Tanzania	https://www.aljazeera.com/news/2021/11/24/tanzania-allow-students-attend-school-after-giving-birth
787	aljazeera	images/img_787.jpg	Tanzania Chadema party chairman Freeman Mbowe flashes a victory sign at the Kisutu Resident Magistrate's Court in Dar-es-Salaam	A man with a face mask	Tanzania	https://www.aljazeera.com/news/2021/8/6/tanzania-opposition-leader-mbowe-in-court-on-terrorism-charges
788	aljazeera	images/img_788.jpg	Mbowe faces two charges of conspiracy to commit crimes and financing of terrorist acts	A group of men standing next to a green bus	Tanzania	https://www.aljazeera.com/news/2021/8/6/tanzania-opposition-leader-mbowe-in-court-on-terrorism-charges
789	aljazeera	images/img_789.jpg	President Samia Suluhu Hassan has pledged to invest in vaccine manufacturing	Samia Suluhu wearing a red head scarf	Tanzania	https://www.aljazeera.com/news/2021/7/28/tanzanian-president-gets-covid-jab-kicks-off-vaccination-program
790	aljazeera	images/img_790.jpg	Samia Suluhu with a black head covering and a hand on his face	Samia Suluhu Hassan's comments were widely derided online	Tanzania	https://www.aljazeera.com/news/2021/8/23/outcry-as-tanzania-leader-calls-women-footballers-flat-chested
791	aljazeera	images/img_791.jpg	The TPLF dominated government for nearly three decades, until Abiy came to power in 2018	A group of people walking down a street holding banners	Ethiopia	https://preview.vision.azure.com/demo/image-captioning
792	aljazeera	images/img_792.jpg	At least a dozen refugees have so far reportedly died in sub-zero temperatures along the Belarus-Poland border, but the real number is believed to be higher	A group of people walking in the snow	Belarus	https://www.aljazeera.com/news/2021/11/24/as-belarus-eu-tussle-edges-toward-war-migrant-crisis-deepens
793	aljazeera	images/img_793.jpg	Refugees gather during the distribution of humanitarian aid on the border in Grodno, Belarus	A group of people in a roller coaster	Belarus	https://www.aljazeera.com/news/2021/11/24/as-belarus-eu-tussle-edges-toward-war-migrant-crisis-deepens
794	aljazeera	images/img_794.jpg	Refugees clash with Polish officers as they attempt to cross into Poland at the Bruzgi-Kuznica border crossing	Two people in winter coats	Belarus	https://www.aljazeera.com/news/2021/11/24/as-belarus-eu-tussle-edges-toward-war-migrant-crisis-deepens
795	aljazeera	images/img_795.jpg	Dozens of refugees have been detained after crossing into Poland from Belarus	A group of people in military uniforms	Belarus	https://www.aljazeera.com/news/2021/11/24/as-belarus-eu-tussle-edges-toward-war-migrant-crisis-deepens
796	aljazeera	images/img_796.jpg	Polish military police stay on guard at the Poland-Belarus border near Kuznica, Poland	A group of soldiers holding guns	Poland	https://www.aljazeera.com/news/2021/11/24/as-belarus-eu-tussle-edges-toward-war-migrant-crisis-deepens
797	aljazeera	images/img_797.jpg	Migrants are helped by a RNLI (Royal National Lifeboat Institution) lifeboat before being taken to a beach in Dungeness, on the southeast coast of England, on November 24, 2021, after crossing the English Channel	A boat with people on it	UK	https://www.aljazeera.com/news/2021/11/24/24-dead-after-boat-sinks-in-english-channel-french-mayor
798	aljazeera	images/img_798.jpg	The UK has urged France to take stricter actions against those attempting to make the journey across the English Channel	A group of people on a beach	UK	https://www.aljazeera.com/news/2021/11/24/24-dead-after-boat-sinks-in-english-channel-french-mayor
799	aljazeera	images/img_799.jpg	Suprabha Seshan, plant conservationist, restoration ecologist and director of the Gurukula Botanical Sanctuary situated in the Western Ghat mountains, looks at the tranfer of an epiphyte plant on a tree at the Gurukula Botanical Sanctuary in Kerala's Wayanad District.	A person and a dog on a hill	India	https://www.aljazeera.com/gallery/2021/11/4/india-women-guarding-rainforest-western-ghats-climate-crisis
800	aljazeera	images/img_800.jpg	Dressed in big boots - to protect against cobras and insects - and brightly coloured tunics, their hair tied under scarves, the women put in long days in the forests, the sanctuary's greenhouses and its nursery.	A group of people standing on rocks	India	https://www.aljazeera.com/gallery/2021/11/4/india-women-guarding-rainforest-western-ghats-climate-crisis
801	aljazeera	images/img_801.jpg	Workers repot plants cultivated at the Gurukula Botanical Sanctuary	A group of people sitting outside	India	https://www.aljazeera.com/gallery/2021/11/4/india-women-guarding-rainforest-western-ghats-climate-crisis
802	aljazeera	images/img_802.jpg	At Gurukula Botanical Sanctuary a group of 27 women act as guardians of the rare ferns, tree-hugging mosses and thousands of other plants that may otherwise be lost forever.	A person standing in a garden	India	https://www.aljazeera.com/gallery/2021/11/4/india-women-guarding-rainforest-western-ghats-climate-crisis
803	aljazeera	images/img_803.jpg	Laly Joseph, another of the senior gardeners, scours the mountains for species that need to be moved to Gurukula for intensive care.	A man carrying a basket of vegetables	India	https://www.aljazeera.com/gallery/2021/11/4/india-women-guarding-rainforest-western-ghats-climate-crisis
804	aljazeera	images/img_804.jpg	Three generations of "rainforest gardeners" - women from local villages in the hot and humid Kerala state - have worked with botanists to build up the sanctuary.	A group of people playing with a statue	India	https://www.aljazeera.com/gallery/2021/11/4/india-women-guarding-rainforest-western-ghats-climate-crisis
805	aljazeera		A soldier with the Tigrayan forces reads a book as he guards the headquarters of the Tigrai Mass Media Agency in Mekelle, the capital of Tigray region	A man sitting in a chair with a rifle	Ethiopia	https://www.aljazeera.com/gallery/2021/7/27/in-pictures-grim-aftermath-of-ethiopian-battle-offers-rare-clues
806	aljazeera		Villagers return from a market to Yechila town in south-central Tigray walking past burned vehicles, in Tigray.	A bus and several vehicles in a desert	Ethiopia	https://www.aljazeera.com/gallery/2021/7/27/in-pictures-grim-aftermath-of-ethiopian-battle-offers-rare-clues
807	aljazeera		Tiebei Negash covers her mouth and nose with a shawl to ward off the smell of dead bodies in her village of Sheweate Hugum in south-central Tigray.	A man on a bicycle	Ethiopia	https://www.aljazeera.com/gallery/2021/7/27/in-pictures-grim-aftermath-of-ethiopian-battle-offers-rare-clues
808	aljazeera		Captive Ethiopian army soldiers get their water ration in a prison in the outskirts of Mekelle, the capital of the Tigray region.	A group of soldiers in a line	Ethiopia	https://www.aljazeera.com/gallery/2021/7/27/in-pictures-grim-aftermath-of-ethiopian-battle-offers-rare-clues
809	aljazeera		Colonel Hussein Mohamed said he commanded 3,700 soldiers from the army's 11th division at Sheweate Hugum. He said at least 100 government soldiers died and 900 were captured across three days of fighting in the village.	A group of people standing around a train	Ethiopia	https://www.aljazeera.com/gallery/2021/7/27/in-pictures-grim-aftermath-of-ethiopian-battle-offers-rare-clues
810	aljazeera		Newly recruited youth joining Tigrayan forces march through the village of Nebelet, northern Tigray.	A group of people running in a street	Ethiopia	https://www.aljazeera.com/gallery/2021/7/27/in-pictures-grim-aftermath-of-ethiopian-battle-offers-rare-clues
811	aljazeera		The body of an Ethiopian soldier in a truck was damaged during fighting between Ethiopia's military and Tigrayan forces in Yechila town, south-central Tigray.	A truck with a large load	Ethiopia	https://www.aljazeera.com/gallery/2021/7/27/in-pictures-grim-aftermath-of-ethiopian-battle-offers-rare-clues
812	aljazeera		A man waves a Tigray flag in the village of Nebelet, northern Tigray, Ethiopia.	A person holding a flag	Ethiopia	https://www.aljazeera.com/gallery/2021/7/27/in-pictures-grim-aftermath-of-ethiopian-battle-offers-rare-clues
813	aljazeera		A firefighter dousing a fire in a building in Ain al-Hammam village in the Tizi Ouzou region, east of Algiers.	A person holding a balloon	Algeria	https://www.aljazeera.com/gallery/2021/8/11/dozens-dead-as-wildfires-rip-through-northern-algeria
814	aljazeera		More than 70 fires have broken out in 18 states across the north of the country, including 10 around Tizi Ouzou, one of the most populous cities in Kabylie.	A few firefighters spraying water on a fire	Algeria	https://www.aljazeera.com/gallery/2021/8/11/dozens-dead-as-wildfires-rip-through-northern-algeria
815	aljazeera		People attempt to put out a fire in the mountainous Tizi Ouzou province.	A group of people running away from a fire	Algeria	https://www.aljazeera.com/gallery/2021/8/11/dozens-dead-as-wildfires-rip-through-northern-algeria
816	aljazeera		As temperatures remain high, the outlook is uncertain in a country already struggling with severe water shortages.	A person walking on a dirt road with a building in the background	Algeria	https://www.aljazeera.com/gallery/2021/8/11/dozens-dead-as-wildfires-rip-through-northern-algeria
817	aljazeera		Medics carry away the body of a man during a wildfire in Tizi Ouzou.	A group of people carrying a large sheet of fabric	Algeria	https://www.aljazeera.com/gallery/2021/8/11/dozens-dead-as-wildfires-rip-through-northern-algeria
818	aljazeera		Wildfires have killed at least 42 people in Algeria.	A group of men in a car	Algeria	https://www.aljazeera.com/gallery/2021/8/11/dozens-dead-as-wildfires-rip-through-northern-algeria
819	aljazeera		An injured man looks on during a wildfire in Tizi Ouzou	A man with a scarf on his head and a bottle of water	Algeria	https://www.aljazeera.com/gallery/2021/8/11/dozens-dead-as-wildfires-rip-through-northern-algeria
820	aljazeera		This aerial view shows young athletes gathered across a field at a camp for displaced Syrians during the so-called Tent Olympics 2020 in the town of Foua, in Syria's last major rebel bastion of Idlib.	A group of people at an event	Syria	https://www.aljazeera.com/gallery/2021/8/8/displaced-syrian-children-hold-tent-olympics
821	aljazeera		Displaced Syrian boys in karate outfits warm up during the Tent Olympics.	A group of people in karate uniforms	Syria	https://www.aljazeera.com/gallery/2021/8/8/displaced-syrian-children-hold-tent-olympics
822	aljazeera		The Idlib region is home to nearly three million people, two-thirds of them displaced from other parts of Syria over the course of its 10-year-old conflict.	A group of people watching a person do a handstand	Syria	https://www.aljazeera.com/gallery/2021/8/8/displaced-syrian-children-hold-tent-olympics
823	aljazeera		The majority of those who have lost their homes live in camps dotted across the region, dependent on humanitarian aid to survive and battling the cold and floods in winter.	A group of people watching a person do a stunt on a large circle	Syria	https://www.aljazeera.com/gallery/2021/8/8/displaced-syrian-children-hold-tent-olympics
824	aljazeera		Displaced Syrian boys stand on the podium after winning medals during the so-called Tent Olympics in Foua.	A group of people standing around a man sitting on a purple chair	Syria	https://www.aljazeera.com/gallery/2021/8/8/displaced-syrian-children-hold-tent-olympics
825	aljazeera		On the race track, a boy ran as fast as he could clutching a cutout of a horse's head to his chest in a 'horse race'.	A group of people running	Syria	https://www.aljazeera.com/gallery/2021/8/8/displaced-syrian-children-hold-tent-olympics
826	aljazeera		Surrounded by a small crowd, two boys in white karate outfits squared off against each other, while another - much shorter - appeared to act as referee.	A group of people standing on a dirt road with flags	Syria	https://www.aljazeera.com/gallery/2021/8/8/displaced-syrian-children-hold-tent-olympics
827	aljazeera		Participants and organisers cheered wildly as the winners stepped up onto the podium to receive their medals under a shower of confetti.	A man brushing his teeth	Syria	https://www.aljazeera.com/gallery/2021/8/8/displaced-syrian-children-hold-tent-olympics
828	aljazeera		Syria's war has killed about 500,000 people since starting in 2011 with the repression of anti-government protests and displaced millions in and outside the country.	A high angle view of a construction site	Syria	https://www.aljazeera.com/gallery/2021/8/8/displaced-syrian-children-hold-tent-olympics
829	aljazeera		Camel race finalists wait to be awarded during the Cure Salee, the annual festival for nomadic people, in Ingall, northern Niger.	A couple of boys riding camels	Niger	https://www.aljazeera.com/gallery/2021/9/21/ingall-niger-hosts-camel-race-sahara-desert
830	aljazeera		Young participants wait at the starting line of a camel race in Ingall.	A group of people riding camels	Niger	https://www.aljazeera.com/gallery/2021/9/21/ingall-niger-hosts-camel-race-sahara-desert
831	aljazeera		A young man rides his camel during the Cure Salee.	A person riding a camel	Niger	https://www.aljazeera.com/gallery/2021/9/21/ingall-niger-hosts-camel-race-sahara-desert
832	aljazeera		A young Wodaabe man helps his friend to wrap his turban during the Cure Salee in Ingall.	A group of people in a desert	Niger	https://www.aljazeera.com/gallery/2021/9/21/ingall-niger-hosts-camel-race-sahara-desert
833	aljazeera		The competition draws racing camels from across Niger to the oasis town of Ingall, the country's traditional gateway to the Sahara.	A group of people riding camels	Niger	https://www.aljazeera.com/gallery/2021/9/21/ingall-niger-hosts-camel-race-sahara-desert
834	aljazeera		Spectators follow the camel race on their motorbikes.	A group of people riding motorcycles on a dirt road	Niger	https://www.aljazeera.com/gallery/2021/9/21/ingall-niger-hosts-camel-race-sahara-desert
835	aljazeera		Spectators watch the camel race.	A group of people in traditional dress	Niger	https://www.aljazeera.com/gallery/2021/9/21/ingall-niger-hosts-camel-race-sahara-desert
836	aljazeera		Riders crossing the finish line. "There is football in Europe, here we have camel racing,” says Khamid Ekwel, a renowned owner of racing camels.	A group of people riding camels	Niger	https://www.aljazeera.com/gallery/2021/9/21/ingall-niger-hosts-camel-race-sahara-desert
837	aljazeera		A volunteer from Mehmankhana, a non-profit group, prepares food for pandemic-affected people	A group of people cooking food	Bangladesh	https://www.aljazeera.com/gallery/2021/8/5/bangladesh-street-kitchens-free-food-covid-pandemic-poverty
838	aljazeera		People waiting in a queue for the food distributed by Mehmankhana, which feeds hundreds of unemployed or struggling workers.	A group of people standing in a street	Bangladesh	https://www.aljazeera.com/gallery/2021/8/5/bangladesh-street-kitchens-free-food-covid-pandemic-poverty
839	aljazeera		When Bangladesh shut down for more than two months last year during its first COVID outbreak, hundreds of charities, civic groups and political parties gave out food, cash, masks and sanitiser to those who lost their jobs.	A group of people standing around a man in a garment	Bangladesh	https://www.aljazeera.com/gallery/2021/8/5/bangladesh-street-kitchens-free-food-covid-pandemic-poverty
840	aljazeera		The SANEM research foundation says the poverty rate has shot back up to 40 percent during the pandemic as businesses, schools and government offices have shut down.	A group of people eating outside	Bangladesh	https://www.aljazeera.com/gallery/2021/8/5/bangladesh-street-kitchens-free-food-covid-pandemic-poverty
841	aljazeera		While the government has allowed some garment factories to reopen and spent $15bn on stimulus packages, hundreds of thousands of people have lost their jobs.	A group of women sitting on the ground eating	Bangladesh	https://www.aljazeera.com/gallery/2021/8/5/bangladesh-street-kitchens-free-food-covid-pandemic-poverty
842	aljazeera		Coronavirus fatigue has set in and people have become less willing to finance charity organisations as the pandemic drags on.	A group of people walking down a street with a bowl on their head	Bangladesh	https://www.aljazeera.com/gallery/2021/8/5/bangladesh-street-kitchens-free-food-covid-pandemic-poverty
843	aljazeera		A volunteer from Mehmankhana distributing food to the pandemic-affected people at Lalmatia area in Dhaka.	A group of people sitting around a table with food	Bangladesh	https://www.aljazeera.com/gallery/2021/8/5/bangladesh-street-kitchens-free-food-covid-pandemic-poverty
844	aljazeera		Mehmankhana feeds more than 2,500 people a day.	A person sitting on a bicycle	Bangladesh	https://www.aljazeera.com/gallery/2021/8/5/bangladesh-street-kitchens-free-food-covid-pandemic-poverty
845	aljazeera		Lazaro Kamlem, 47, 'cacique' of Palmeira village, stands in a wood canoe in Itajai river in Xokleng Laklano Indigenous land, Jose Boiteux, Santa Catarina state, Brazil.	A man standing on a boat	Brazil	https://www.aljazeera.com/gallery/2021/8/25/how-brazils-indigenous-rights-hinge-on-one-tribes-legal-battle
846	aljazeera		Determined to keep their traditions alive, the Xokleng gather around bonfires at night to tell stories in their own language and keep up their rituals of dance and prayer, sometimes painting the faces of their young ones.	A group of people around a fire	Brazil	https://www.aljazeera.com/gallery/2021/8/25/how-brazils-indigenous-rights-hinge-on-one-tribes-legal-battle
847	aljazeera		Lazaro Kamlem, 47, is a descendent of Shaman Kamlem, the Xokleng medicine man who said on his deathbed in 1925 that they would lose their land to "white men," but would one day gain it back.	A man and woman standing in a forest	Brazil	https://www.aljazeera.com/gallery/2021/8/25/how-brazils-indigenous-rights-hinge-on-one-tribes-legal-battle
848	aljazeera		Joao Pate, 78, a former 'cacique' or chief, poses for a photograph in Xokleng Laklano Indigenous land.	A man wearing glasses	Brazil	https://www.aljazeera.com/gallery/2021/8/25/how-brazils-indigenous-rights-hinge-on-one-tribes-legal-battle
849	aljazeera		Vanda Kamlem, 87, sits surrounded by her grandchildren at her house in Xokleng Laklano Indigenous land	A person and a group of children	Brazil	https://www.aljazeera.com/gallery/2021/8/25/how-brazils-indigenous-rights-hinge-on-one-tribes-legal-battle
850	aljazeera		Children play as their parents participate in a prayer in Xokleng Laklano Indigenous land.	A group of children in a hallway	Brazil	https://www.aljazeera.com/gallery/2021/8/25/how-brazils-indigenous-rights-hinge-on-one-tribes-legal-battle
851	aljazeera		The Xokleng number some 3,000 people today, crowding into their 14,156 hectares of hilly territory, where landslides threaten homes and most land is too steep for agriculture.	A group of people in a forest	Brazil	https://www.aljazeera.com/gallery/2021/8/25/how-brazils-indigenous-rights-hinge-on-one-tribes-legal-battle
852	aljazeera		Xokleng elders recall the days when plentiful fish and game fed their families, before the bulk of their fertile lands were sold by the state to tobacco farmers in the 1950s.	A man standing on a dock with a fire in his hand	Brazil	https://www.aljazeera.com/gallery/2021/8/25/how-brazils-indigenous-rights-hinge-on-one-tribes-legal-battle
853	aljazeera		Fisherman Luiz Cabral, 52, throws a fish in a wooden canoe on the Itajai river near the north dam, on Xokleng Laklano Indigenous land.	A man holding a fish	Brazil	https://www.aljazeera.com/gallery/2021/8/25/how-brazils-indigenous-rights-hinge-on-one-tribes-legal-battle
854	aljazeera		The Xokleng still share their food in communal meals but the beef they roast is bought off the reservation, as they lack enough land to hunt or to raise cattle.	A man cooking food on a grill	Brazil	https://www.aljazeera.com/gallery/2021/8/25/how-brazils-indigenous-rights-hinge-on-one-tribes-legal-battle
855	aljazeera		Loreni Ngavem Pripra, 44, sits with Xokleng Indigenous women as they chat after lunch in Xokleng Laklano Indigenous land.	Katski Flores et al. sitting in a grassy area	Brazil	https://www.aljazeera.com/gallery/2021/8/25/how-brazils-indigenous-rights-hinge-on-one-tribes-legal-battle
856	aljazeera		n elderly Palestinian woman holds a Palestinian flag during the protests near the boundary between Israel and the Gaza Strip.	A person holding a flag	Palestine	https://www.aljazeera.com/gallery/2021/8/22/gaza-border-clashes-wound-41-palestinians
857	aljazeera		Demonstrators march towards the Gaza Strip's fence with Israel.	A crowd of people walking on a street	Palestine	https://www.aljazeera.com/gallery/2021/8/22/gaza-border-clashes-wound-41-palestinians
858	aljazeera		Palestinian protesters take cover from Israeli tear gas during the clashes near the fence.	A group of people walking on a dirt path with a large explosion behind them	Palestine	https://www.aljazeera.com/gallery/2021/8/22/gaza-border-clashes-wound-41-palestinians
859	aljazeera		The violence erupted after hundreds of Palestinians took part in a demonstration organised to draw attention to a stifling Israeli blockade of the territory.	A group of people running	Palestine	https://www.aljazeera.com/gallery/2021/8/22/gaza-border-clashes-wound-41-palestinians
860	aljazeera		Palestinian medics evacuate a wounded person from the Gaza Strip fence with Israel.	A group of people standing outside	Palestine	https://www.aljazeera.com/gallery/2021/8/22/gaza-border-clashes-wound-41-palestinians
861	aljazeera		Medics and protesters rescue a wounded cameraman from the Gaza Strip fence.	Giorgio Petrosyan et al. posing for a photo with a camera	Palestine	https://www.aljazeera.com/gallery/2021/8/22/gaza-border-clashes-wound-41-palestinians
862	aljazeera		Palestinian protesters carry a wounded young man.	A group of people kneeling on the ground	Palestine	https://www.aljazeera.com/gallery/2021/8/22/gaza-border-clashes-wound-41-palestinians
863	aljazeera		A wounded Palestinian child is taken to hospital after taking part in the protest at the Israel-Gaza fence. A 13-year-old Palestinian boy was shot in the head, health officials said.	A group of people in a street	Palestine	https://www.aljazeera.com/gallery/2021/8/22/gaza-border-clashes-wound-41-palestinians
864	aljazeera		Israeli troops fired live rounds at Palestinian protesters who hurled petrol bombs and burned tyres from behind the Gaza Strip's fence.	A group of people holding a flag	Palestine	https://www.aljazeera.com/gallery/2021/8/22/gaza-border-clashes-wound-41-palestinians
865	aljazeera		A Lebanese army pilot prepares a R44 Raven II helicopter for tourists at the Rayak airbase in the Beqaa Valley.	A person in a helicopter	Lebanon	https://www.aljazeera.com/gallery/2021/9/15/lebanons-military-offers-tourists-helicopter-rides-to-raise-cash
866	aljazeera		Hundreds of cars line up in the early morning to buy fuel at a gas station on the outskirts of Beirut.	A group of people standing in a parking lot with cars and a person on a motorcycle	Lebanon	https://www.aljazeera.com/gallery/2021/9/15/lebanons-military-offers-tourists-helicopter-rides-to-raise-cash
867	aljazeera		Lebanese military servicemen help tourists board a Lebanese Army R44 helicopter.	A group of people standing next to a helicopter	Lebanon	https://www.aljazeera.com/gallery/2021/9/15/lebanons-military-offers-tourists-helicopter-rides-to-raise-cash
868	aljazeera		"The Gesture”, left, is a 25m (82 foot)-high sculpture made from the wreckage of the Beirut port blast to commemorate the victims of the August 2020 explosion.	A large stone structure with a tower	Lebanon	https://www.aljazeera.com/gallery/2021/9/15/lebanons-military-offers-tourists-helicopter-rides-to-raise-cash
869	aljazeera		Nobel Peace Prize winner and former South African President FW de Klerk addresses the Trinity College Law Society	A man wearing glasses	South Africa	https://www.aljazeera.com/gallery/2021/11/11/south-africas-last-apartheid-president-fw-de-klerk-dies
870	aljazeera		In this photo from September 14, 1991, South African President FW de Klerk shakes hands with Anglican Archbishop Desmond Tutu in Johannesburg.	F.W. de Klerk, Lawrence Eagleburger are posing for a picture	South Africa	https://www.aljazeera.com/gallery/2021/11/11/south-africas-last-apartheid-president-fw-de-klerk-dies
871	aljazeera		South African ANC leader Nelson Mandela, left, and President FW de Klerk, centre, are congratulated by then-US President Bill Clinton after jointly receiving the Liberty Medal at Independence Hall, Philadelphia on July 4, 1993.	A group of men in suits	South Africa	https://www.aljazeera.com/gallery/2021/11/11/south-africas-last-apartheid-president-fw-de-klerk-dies
872	aljazeera		South African Deputy President de Klerk and South African President Mandela pose with their Nobel Peace Prize Gold Medals and Diplomas in Oslo on December 10, 1993.	F.W. de Klerk, Nelson Mandela holding awards	South Africa	https://www.aljazeera.com/gallery/2021/11/11/south-africas-last-apartheid-president-fw-de-klerk-dies
873	aljazeera		Mandela and Tutu arrive for de Klerk's 70th birthday celebrations in Cape Town on March 17, 2006.	F.W. de Klerk, Desmond Tutu et al. standing together	South Africa	https://www.aljazeera.com/gallery/2021/11/11/south-africas-last-apartheid-president-fw-de-klerk-dies
874	aljazeera		A firefighter battles the wildfire in Estepona, Spain.	A person with a fire hose spraying water on a hill	Spain	https://www.aljazeera.com/gallery/2021/9/13/spain-deploys-military-against-wildfire-evacuates-2500
875	aljazeera		A large mobilisation is ongoing to try to control the fire that has already burned thousands of hectares of forest.	Firemen standing on a bridge	Spain	https://www.aljazeera.com/gallery/2021/9/13/spain-deploys-military-against-wildfire-evacuates-2501
876	aljazeera		An emergency brigade has come from the Morón military base to join more than 300 firefighters battling the flames.	A firefighter putting out a fire	Spain	https://www.aljazeera.com/gallery/2021/9/13/spain-deploys-military-against-wildfire-evacuates-2502
877	aljazeera		More than 1,000 people were evacuated from areas around the resort town of Estepona, which is popular with tourists.	A couple of men in yellow jackets standing next to a yellow helicopter	Spain	https://www.aljazeera.com/gallery/2021/9/13/spain-deploys-military-against-wildfire-evacuates-2503
878	aljazeera		Authorities evacuated nearly 1,500 residents from the towns of Jubrique and Genalguacil.	A group of emergency personnel standing next to a yellow ambulance	Spain	https://www.aljazeera.com/gallery/2021/9/13/spain-deploys-military-against-wildfire-evacuates-2504
879	aljazeera		A boy carries a cat while emergency personnel gather in the village of Algatocin in Malaga province.	A person holding a dog	Spain	https://www.aljazeera.com/gallery/2021/9/13/spain-deploys-military-against-wildfire-evacuates-2505
880	aljazeera		A man who was evacuated from his nearby town sits in a sports centre in Ronda.	A person sitting at a table	Spain	https://www.aljazeera.com/gallery/2021/9/13/spain-deploys-military-against-wildfire-evacuates-2506
881	aljazeera		iego Guerrero, 7, watches an online video on a mobile phone at home in the village of Sotomo, outside the town of Cochamo, Los Lagos region.	A man sitting on a bed	Chile	https://www.aljazeera.com/gallery/2021/8/29/elon-musks-satellites-beam-internet-into-chilean-boys-life
882	aljazeera		Diego Guerrero stands on the deck of his father's boat on his way to John F Kennedy School.	A child on a boat	Chile	https://www.aljazeera.com/gallery/2021/8/29/elon-musks-satellites-beam-internet-into-chilean-boys-life
883	aljazeera		Sotomo stands out against a mist-swathed row of rocky outcrops jutting out into the Pacific Ocean. It can be accessed only by boat.	A group of people fishing	Chile	https://www.aljazeera.com/gallery/2021/8/29/elon-musks-satellites-beam-internet-into-chilean-boys-life
884	aljazeera		Sotomo is one of two places in Chile to be chosen for a pilot project run by billionaire Elon Musk to receive free internet for a year.	A couple of people and a dog on a rocky beach	Chile	https://www.aljazeera.com/gallery/2021/8/29/elon-musks-satellites-beam-internet-into-chilean-boys-life
885	aljazeera		Carlos and his son Diego arrive at John F Kennedy School in the village of Sotomo.	A group of people walking towards a building with a sign on it	Chile	https://www.aljazeera.com/gallery/2021/8/29/elon-musks-satellites-beam-internet-into-chilean-boys-life
886	aljazeera		Using tablets provided by the education ministry, the school's seven pupils can now tap into online learning material, watch films, do virtual museum visits and try out video calls to children in other schools.	A couple of people wearing masks	Chile	https://www.aljazeera.com/gallery/2021/8/29/elon-musks-satellites-beam-internet-into-chilean-boys-life
887	aljazeera		Teacher Javier de La Barra Casanova, 58, works with Diego during one of his classes.	A person and a boy in a classroom	Chile	https://www.aljazeera.com/gallery/2021/8/29/elon-musks-satellites-beam-internet-into-chilean-boys-life
888	aljazeera		Carlos has ambitious plans for his son and hopes the window onto the world the new internet connection will give him will broaden his horizons.	A group of men sitting on a couch	Chile	https://www.aljazeera.com/gallery/2021/8/29/elon-musks-satellites-beam-internet-into-chilean-boys-life
889	aljazeera		Moussa Kamara shows a sketch of a Tolou Keur garden, which holds plants and trees resistant to hot, dry climates.	A person sitting with a group of children	Senegal	https://www.aljazeera.com/gallery/2021/7/29/senegalese-plant-circular-gardens-in-green-wall-defence
890	aljazeera		Khadidiatou Diouf, 32, a Tolou Keur programme trainer at the eco-villages department of the Senegalese Agency for Reforestation and the Great Green Wall, shows how to install a watering system at a newly built garden in Boki Diawe.	A group of people working in a field	Senegal	https://www.aljazeera.com/gallery/2021/7/29/senegalese-plant-circular-gardens-in-green-wall-defence
891	aljazeera		A chicken cage at a Tolou Keur garden in Boki Diawe.	A group of people playing baseball	Senegal	https://www.aljazeera.com/gallery/2021/7/29/senegalese-plant-circular-gardens-in-green-wall-defence
892	aljazeera		Ibrahima Samba Diop, 75, who is one of the beneficiaries of the Tolou Keur garden scheme, checks plants within the Great Green Wall target area in Kanel, Matam region.	A person working in a farm	Senegal	https://www.aljazeera.com/gallery/2021/7/29/senegalese-plant-circular-gardens-in-green-wall-defence
893	aljazeera		Kamara helps to install a water reserve at a Tolou Keur garden.	A group of people on a ladder	Senegal	https://www.aljazeera.com/gallery/2021/7/29/senegalese-plant-circular-gardens-in-green-wall-defence
894	aljazeera		A Fulani nomadic tribe member sits on a cart as she travels in the Barkedji-Dodji Forest, an area which is part of the Great Green Wall of the Sahara and the Sahel.	A person and a child riding on a vehicle with a child on the back	Senegal	https://www.aljazeera.com/gallery/2021/7/29/senegalese-plant-circular-gardens-in-green-wall-defence
895	aljazeera		Supporters of far-right President Jair Bolsonaro march in a show of support for his attacks on the country's supreme court, in Rio de Janeiro	A group of people marching	Brazil	https://www.aljazeera.com/gallery/2021/9/7/photos-rallies-for-and-against-bolsonaro-on-national-day
896	aljazeera		Demonstrators protest against far-right President Jair Bolsonaro's administration amid Independence Day celebrations, in Rio de Janeiro.	A person holding a flag and a sign in a parade	Brazil	https://www.aljazeera.com/gallery/2021/9/7/photos-rallies-for-and-against-bolsonaro-on-national-day
897	aljazeera		Brazilian President Jair Bolsonaro waves to supporters at the start of a flag-raising ceremony on Independence Day at Alvorada Palace presidential residence in Brasilia.	Jair Bolsonaro et al. standing together	Brazil	https://www.aljazeera.com/gallery/2021/9/7/photos-rallies-for-and-against-bolsonaro-on-national-day
898	aljazeera		A man takes a selfie holding the Portuguese message, "Bolsonaro thief. Impeachment is the solution" during a protest against Brazilian President Jair Bolsonaro's handling of the COVID-19 pandemic, the economy and corruption, on Independence Day, in Rio de Janeiro, Brazil.	Steve M Nash holding a sign	Brazil	https://www.aljazeera.com/gallery/2021/9/7/photos-rallies-for-and-against-bolsonaro-on-national-day
899	aljazeera		Supporters of President Jair Bolsonaro march in a show of support in Rio de Janeiro.	Jair Bolsonaro, Jair Bolsonaro, Jair Bolsonaro et al. holding flags	Brazil	https://www.aljazeera.com/gallery/2021/9/7/photos-rallies-for-and-against-bolsonaro-on-national-day
900	aljazeera		People take part in a demonstration against Brazilian President Jair Bolsonaro on Brazil's Independence Day.	A group of people holding flags	Brazil	https://www.aljazeera.com/gallery/2021/9/7/photos-rallies-for-and-against-bolsonaro-on-national-day
901	aljazeera		A protester holds the Portuguese message, "Get out now Bolsonaro" during a protest against Brazilian President Jair Bolsonaro's handling of the COVID-19 pandemic, the economy and corruption.	A group of people wearing clothing and holding a sign	Brazil	https://www.aljazeera.com/gallery/2021/9/7/photos-rallies-for-and-against-bolsonaro-on-national-day
902	aljazeera		A woman sells Brazilian flags, hats and posters with a portrait of President Jair Bolsonaro during a demonstration in support of Brazilian President Jair Bolsonaro, at Copacabana beach in Rio de Janeiro.	A person painting on the ground	Brazil	https://www.aljazeera.com/gallery/2021/9/7/photos-rallies-for-and-against-bolsonaro-on-national-day
903	aljazeera		A policeman checks a person's bag during an anti-Bolsonaro demonstration, in Rio de Janeiro - thousands of police are on duty amid concerns demonstrators could clash.	A man in a black jacket talking to a man in a black hat	Brazil	https://www.aljazeera.com/gallery/2021/9/7/photos-rallies-for-and-against-bolsonaro-on-national-day
904	aljazeera		A Palestinian demonstrator carries an injured woman away from Israeli security forces following a protest along the separation barrier.	A group of people in a field	Palestine	https://www.aljazeera.com/gallery/2021/8/26/palestinians-gaza-strip-protest-israel-blockade
905	aljazeera		Protesters evacuate a wounded youth during the protest east of Khan Younis.	A group of people in a line	Palestine	https://www.aljazeera.com/gallery/2021/8/26/palestinians-gaza-strip-protest-israel-blockade
906	aljazeera		Palestinian medics reported at least 14 people were wounded, including five people who were shot.	A group of people playing with a person lying on the ground	Palestine	https://www.aljazeera.com/gallery/2021/8/26/palestinians-gaza-strip-protest-israel-blockade
907	aljazeera		An intubated patient sits on a bed at ward in a hospital dedicated to coronavirus cases in Idlib.	A person in a white robe and helmet holding a bow and arrow	Syria	https://www.aljazeera.com/gallery/2021/9/22/idlib-syria-covid-rebel-area-struggles-with-virus-surge
908	aljazeera		A patient receives care at ward in a hospital dedicated to COVID-19 coronavirus cases in Idlib.	A person in a hospital bed	Syria	https://www.aljazeera.com/gallery/2021/9/22/idlib-syria-covid-rebel-area-struggles-with-virus-surge
909	aljazeera		Nurses treat patients infected with the coronavirus in the intensive care unit at the Syrian American Medical Society Hospital, in the city of Idlib.	A group of people in a hospital	Syria	https://www.aljazeera.com/gallery/2021/9/22/idlib-syria-covid-rebel-area-struggles-with-virus-surge
910	aljazeera		Medical workers carry a patient infected with the coronavirus on a stretcher at a hospital in the city of Idlib.	A group of people in surgical scrubs and masks standing next to a patient	Syria	https://www.aljazeera.com/gallery/2021/9/22/idlib-syria-covid-rebel-area-struggles-with-virus-surge
911	aljazeera		Nurses treat patients infected with the coronavirus in the intensive care unit at the Syrian American Medical Society Hospital in Idlib.	Doctors in a hospital room	Syria	https://www.aljazeera.com/gallery/2021/9/22/idlib-syria-covid-rebel-area-struggles-with-virus-surge
912	aljazeera		Migrants queue to be transported from Bajo Chiquito village to the Migrants Reception Station in Lajas Blancas, Darien Province, in Panama.	A group of people standing on a dock by a body of water	Panama	https://www.aljazeera.com/gallery/2021/8/26/haiti-migrants-panama-darien-gap-colombia
913	aljazeera		Migrants from Haiti and other countries arrive in Panamanian territory, after walking for five days through the Darien Gap.	A group of people in rain gear	Panama	https://www.aljazeera.com/gallery/2021/8/26/haiti-migrants-panama-darien-gap-colombia
914	aljazeera		A migrant with her baby upon their arrival at the Tuquesa river in the Bajo Chiquito village, Darien province.	A person carrying a child on the back in a flooded area	Panama	https://www.aljazeera.com/gallery/2021/8/26/haiti-migrants-panama-darien-gap-colombia
915	aljazeera		A family of migrants wait to register in the Bajo Chiquito village.	A group of people walking	Panama	https://www.aljazeera.com/gallery/2021/8/26/haiti-migrants-panama-darien-gap-colombia
916	aljazeera		A group of migrants queue to register in the Bajo Chiquito village.	A man leaning over a railing	Panama	https://www.aljazeera.com/gallery/2021/8/26/haiti-migrants-panama-darien-gap-colombia
917	aljazeera		A group of migrants rest on the banks of the Tuquesa river.	A group of people on a beach	Panama	https://www.aljazeera.com/gallery/2021/8/26/haiti-migrants-panama-darien-gap-colombia
918	aljazeera		A migrant walks over the moored boats in Bajo Chiquito village.	A person standing on a boat	Panama	https://www.aljazeera.com/gallery/2021/8/26/haiti-migrants-panama-darien-gap-colombia
919	aljazeera		Migrants queue to be transported from Bajo Chiquito village to the Migrants Reception Station in Lajas Blancas.	A group of people in clothing	Panama	https://www.aljazeera.com/gallery/2021/8/26/haiti-migrants-panama-darien-gap-colombia
920	aljazeera		The number of children taken through the Darien Gap has multiplied 15-fold in four years, says UNICEF. Many arrive in Panama dehydrated or with breathing difficulties due to exposure to rain and humidity.	A person holding a baby	Panama	https://www.aljazeera.com/gallery/2021/8/26/haiti-migrants-panama-darien-gap-colombia
921	aljazeera		An army soldier takes position after gunfire erupted in Beirut.	A man in military uniform holding a gun	Lebanon	https://www.aljazeera.com/gallery/2021/10/14/photos-armed-clashes-erupts-in-beirut-in-protest-against-blast-judge
922	aljazeera		Supporters of a Shia group allied with Hezbollah help an injured comrade during armed clashes that erupted in the southern Beirut suburb of Dahiyeh.	A group of people fighting in the street	Lebanon	https://www.aljazeera.com/gallery/2021/10/14/photos-armed-clashes-erupts-in-beirut-in-protest-against-blast-judge
923	aljazeera		Army soldiers are deployed after gunfire erupted in Beirut at a site near a protest that was getting under way against Judge Tarek Bitar, who is investigating last year's port explosion, in Beirut.	A soldier holding a gun	Lebanon	https://www.aljazeera.com/gallery/2021/10/14/photos-armed-clashes-erupts-in-beirut-in-protest-against-blast-judge
924	aljazeera		A man runs to take cover as supporters of a Shia group allied with Hezbollah fire weapons during the armed clashes that erupted in Beirut.	A man sitting on a sidewalk	Lebanon	https://www.aljazeera.com/gallery/2021/10/14/photos-armed-clashes-erupts-in-beirut-in-protest-against-blast-judge
925	aljazeera		An army soldier carries a schoolchild as civilians flee after gunfire erupted.	A woman hugging a man in a garment	Lebanon	https://www.aljazeera.com/gallery/2021/10/14/photos-armed-clashes-erupts-in-beirut-in-protest-against-blast-judge
926	aljazeera		Supporters of a Shia group allied with Hezbollah fire weapons in the southern Beirut suburb of Dahiyeh.	A man taking a picture of a car	Lebanon	https://www.aljazeera.com/gallery/2021/10/14/photos-armed-clashes-erupts-in-beirut-in-protest-against-blast-judge
927	aljazeera		Lebanese Army soldiers take a position in the area of Tayouneh, in the southern suburb of the capital Beirut	A group of people standing around a truck with a group of people on it	Lebanon	https://www.aljazeera.com/gallery/2021/10/14/photos-armed-clashes-erupts-in-beirut-in-protest-against-blast-judge
928	aljazeera		A fighter from the Amal movement takes aim during clashes in the area of Tayouneh.	A man playing a guitar	Lebanon	https://www.aljazeera.com/gallery/2021/10/14/photos-armed-clashes-erupts-in-beirut-in-protest-against-blast-judge
929	aljazeera		Lebanese medics help evacuate civilians during clashes in the area of Tayouneh.	A group of people walking in the street	Lebanon	https://www.aljazeera.com/gallery/2021/10/14/photos-armed-clashes-erupts-in-beirut-in-protest-against-blast-judge
930	bbc		Meet Team Scholz (second from left): With the leaders of the Free Democrats, Greens and Social Democrats	Christian Lindner, Olaf Scholz, Susanna Mälkki et al. posing for a photo	Germany	https://www.bbc.com/news/world-europe-59399705
931	bbc		Olaf Scholz has served as vice chancellor since 2018 but is set to take over from Angela Merkel in the second week of December	Olaf Scholz, Angela Merkel holding flowers	Germany	https://www.bbc.com/news/world-europe-59399706
932	bbc		President Macron has had a close relationship with Angela Merkel and Olaf Scholz plans to continue those ties.	Emmanuel Macron, Olaf Scholz et al. walking	Germany	https://www.bbc.com/news/world-europe-59399707
933	the guardian		A nurse prepares a malaria vaccine at a hospital in Yala, Kenya.	A person wearing a mask	Kenya	http://www.theguardian.com/global-development/2021/dec/06/malaria-kills-180000-more-people-annually-than-previously-thought-says-who
934	the guardian		A bank customer clashes with a soldier during a protest in front of a Fransabank branch.	A man in a mask pointing at a woman in a mask	Lebanon	https://www.theguardian.com/news/gallery/2021/dec/03/beirut-clashes-and-dancing-voters-fridays-best-photos
935	the guardian		Medics at Etterbeek-Ixelles hospital	A few people wearing protective gear	Belgium	https://www.theguardian.com/news/gallery/2021/dec/03/beirut-clashes-and-dancing-voters-fridays-best-photos
936	the guardian		Patti LaBelle performs during the national Christmas Tree lighting ceremony at the Ellipse near the White House	A person on a stage with a microphone and Patti LaBelle et al.	USA	https://www.theguardian.com/news/gallery/2021/dec/03/beirut-clashes-and-dancing-voters-fridays-best-photos
937	the guardian		A woman communicates by sign language on International Day of Persons with Disabilities	A person wearing a mask	India	https://www.theguardian.com/news/gallery/2021/dec/03/beirut-clashes-and-dancing-voters-fridays-best-photos
938	the guardian		A member of the clergy takes a photo before Pope Francis’s arrival at the GSP stadium	A person in a white suit standing on a green field	Cyprus	https://www.theguardian.com/news/gallery/2021/dec/03/beirut-clashes-and-dancing-voters-fridays-best-photos
939	the guardian		Supporters of Ousainou Darboe, the former vice-president and leader of the main opposition party, dance and sing at a rally two days before a presidential election	A group of people holding up a sign	Gambia	https://www.theguardian.com/news/gallery/2021/dec/03/beirut-clashes-and-dancing-voters-fridays-best-photos
940	the guardian		Fans dance at a gig during the Trans Musicales festival	A group of people dancing	France	https://www.theguardian.com/news/gallery/2021/dec/03/beirut-clashes-and-dancing-voters-fridays-best-photos
941	the guardian		Anthony Van Dyck’s Portrait of Jacob De Witte and Portrait of Maria Nutius go on view at Sotheby’s before a sale on 8 December	A person looking at a painting	UK	https://www.theguardian.com/news/gallery/2021/dec/03/beirut-clashes-and-dancing-voters-fridays-best-photos
942	the guardian		People wearing masks walk on the steps of a luxury hotel in an upmarket business and shopping area as the coronavirus outbreak continues	A person in a suit and tie walking down a flight of stairs	China	https://www.theguardian.com/news/gallery/2021/dec/01/foggy-fishing-fiji-welcome-wednesday-best-photos
943	the guardian		Commuters ride a tube train at Stratford underground station	People boarding a train	UK	https://www.theguardian.com/news/gallery/2021/dec/01/foggy-fishing-fiji-welcome-wednesday-best-photos
944	the guardian		A health worker collects swab samples from a traveller to test for Covid-19 at a railway station	A group of people in a room	India	https://www.theguardian.com/news/gallery/2021/dec/01/foggy-fishing-fiji-welcome-wednesday-best-photos
945	the guardian		A photographer captures the northern lights near Kirkjufell.	A person standing on a snowy hill with a green aurora in the background	Iceland	https://www.theguardian.com/news/gallery/2021/dec/01/foggy-fishing-fiji-welcome-wednesday-best-photos
946	the guardian		A medical worker checks on a coronavirus patient in the intensive care unit of Bagae hospital.	A group of surgeons performing surgery	South Korea	https://www.theguardian.com/news/gallery/2021/dec/01/foggy-fishing-fiji-welcome-wednesday-best-photos
947	the guardian		An activist wearing a bandana shouts slogans as he takes part in a rally calling for the right to self-determination in the Indonesian-controlled part of Papua, during commemorations on the anniversary of West Papua’s declaration of independence from Dutch colonial rule outside the National Monument complex	A group of people wearing white robes	Indonesia	https://www.theguardian.com/news/gallery/2021/dec/01/foggy-fishing-fiji-welcome-wednesday-best-photos
948	the guardian		Models backstage before the Hakan Akkaya x Cinderella Bridal Capsule Collection show at Tersane Istanbul	A group of people dancing	Turkey	https://www.theguardian.com/news/gallery/2021/dec/01/foggy-fishing-fiji-welcome-wednesday-best-photos
949	the guardian		Traditional dancers in grass skirts welcome holidaymakers as the country opens its borders to international travellers for the first time since the Covid pandemic	A group of people dancing	Fiji	https://www.theguardian.com/news/gallery/2021/dec/01/foggy-fishing-fiji-welcome-wednesday-best-photos
950	the guardian		People hug at a church during a vigil after a shooting at Oxford high school	A group of people in a room	USA	https://www.theguardian.com/news/gallery/2021/dec/01/foggy-fishing-fiji-welcome-wednesday-best-photos
951	the guardian		Boats loaded with traps head out in a snow squall as the lobster fishing season starts, representing a $500m industry	A boat with lights on it	Canada	https://www.theguardian.com/news/gallery/2021/dec/01/foggy-fishing-fiji-welcome-wednesday-best-photos
952	the guardian		The Labour leader, Keir Starmer, heads to a shadow cabinet meeting with some of his new appointees, including David Lammy (left), Yvette Cooper (second right) and Rachel Reeves (right)	Keir Starmer, Rachel Reeves, David Lammy, Yvette Cooper walking on a sidewalk	UK	https://www.theguardian.com/news/gallery/2021/nov/30/mask-checks-and-a-kenyan-nutcracker-tuesdays-best-photos
953	the guardian		Crown Prince Akishino (centre) sits with his son and daughter in the garden of their Akasaka imperial residence	Prince Akishino et al. sitting on a bench in front of a statue	Japan	https://www.theguardian.com/news/gallery/2021/nov/30/mask-checks-and-a-kenyan-nutcracker-tuesdays-best-photos
954	the guardian		Migrants block a street during a protest to call for humanitarian visas for people crossing the country in a caravan on their way to the US border	A group of people on a street at night with Bressay in the background	Mexico	https://www.theguardian.com/news/gallery/2021/nov/30/mask-checks-and-a-kenyan-nutcracker-tuesdays-best-photos
955	the guardian		Municipal workers direct pedestrians away from scaffolding that collapsed during a storm	A group of people walking on a street	Russia	https://www.theguardian.com/news/gallery/2021/nov/30/mask-checks-and-a-kenyan-nutcracker-tuesdays-best-photos
956	the guardian		Princess Anne makes Yvonne Lawson, the founder of a London anti-knife crime charity, an MBE at an investiture ceremony	A person and a girl dancing	UK	https://www.theguardian.com/news/gallery/2021/nov/30/mask-checks-and-a-kenyan-nutcracker-tuesdays-best-photos
957	the guardian		A police officer tries to restrain supporters of the women’s wing of India’s main opposition Congress party	Nagma et al. playing instruments	India	https://www.theguardian.com/news/gallery/2021/nov/30/mask-checks-and-a-kenyan-nutcracker-tuesdays-best-photos
958	the guardian		Police officers check that passengers are wearing face coverings on a tube train	A group of people stand near a train	England	https://www.theguardian.com/news/gallery/2021/nov/30/mask-checks-and-a-kenyan-nutcracker-tuesdays-best-photos
959	the guardian		Travellers queue for Covid tests at a railway station	A person wearing a mask	India	https://www.theguardian.com/news/gallery/2021/nov/30/mask-checks-and-a-kenyan-nutcracker-tuesdays-best-photos
960	the guardian		A Soweto resident passes a mural informing about the dangers of coronavirus	A person standing in front of a wall with a mural	South Africa	https://www.theguardian.com/news/gallery/2021/nov/30/mask-checks-and-a-kenyan-nutcracker-tuesdays-best-photos
961	the guardian		A commuter is reflected in the window of a footbridge at Hamamatsucho station as a high-speed train passes	A person standing next to a train track in a city	Japan	https://www.theguardian.com/news/gallery/2021/nov/30/mask-checks-and-a-kenyan-nutcracker-tuesdays-best-photos
962	the guardian		Members of Dance Centre Kenya take part in a dress rehearsal of The Nutcracker in front of about 1,000 children invited from the Kibera slum	A group of people dancing	Kenya	https://www.theguardian.com/news/gallery/2021/nov/30/mask-checks-and-a-kenyan-nutcracker-tuesdays-best-photos
963	the guardian		Julian Osorio helps Anderson Arboleda during the men’s Madison cycling competition at the Junior Pan American Games	A group of people riding bikes	Colombia	https://www.theguardian.com/news/gallery/2021/nov/30/mask-checks-and-a-kenyan-nutcracker-tuesdays-best-photos
964	the guardian		A Bajau fisher and his daughter	A man and a woman on a boat with a flag	Philippines	https://www.theguardian.com/artanddesign/gallery/2021/nov/24/childhood-resilience-stories-and-dreams-steve-mccurry-in-pictures
965	the guardian		A cow and a boy rest together near Durbar Square, Kathmandu.	A person sitting next to a large cow	Nepal	https://www.theguardian.com/artanddesign/gallery/2021/nov/24/childhood-resilience-stories-and-dreams-steve-mccurry-in-pictures
966	the guardian		A boy in a makeshift bicycle sling with his mother at Banteay Srei temple	A child in a chair	Cambodia	https://www.theguardian.com/artanddesign/gallery/2021/nov/24/childhood-resilience-stories-and-dreams-steve-mccurry-in-pictures
967	the guardian		A boy flexes his muscles in the marble-carving district of Mandalay.	A boy standing on a table	Myanmar	https://www.theguardian.com/artanddesign/gallery/2021/nov/24/childhood-resilience-stories-and-dreams-steve-mccurry-in-pictures
968	the guardian		A girl and her father go to the floating vegetable market in Srinagar	A person and a child on a boat	India	https://www.theguardian.com/artanddesign/gallery/2021/nov/24/childhood-resilience-stories-and-dreams-steve-mccurry-in-pictures
969	the guardian		A girl in waist-deep monsoon floods in front of her home	A person sitting on a fence	Indonesia	https://www.theguardian.com/artanddesign/gallery/2021/nov/24/childhood-resilience-stories-and-dreams-steve-mccurry-in-pictures
970	the guardian		Friends play on a swing	A person jumping in the air	Germany	https://www.theguardian.com/artanddesign/gallery/2021/nov/24/childhood-resilience-stories-and-dreams-steve-mccurry-in-pictures
971	the guardian		Fifth-grade Hazara school children	A group of children sitting in a classroom	Afghanistan	https://www.theguardian.com/artanddesign/gallery/2021/nov/24/childhood-resilience-stories-and-dreams-steve-mccurry-in-pictures
972	the guardian		Children play on an abandoned anti-aircraft gun in Beirut	A group of people jumping over a pile of rocks	Lebanon	https://www.theguardian.com/artanddesign/gallery/2021/nov/24/childhood-resilience-stories-and-dreams-steve-mccurry-in-pictures
973	the guardian		A girl hides her smile in Piazza Navona	A woman sitting on a bench	Italy	https://www.theguardian.com/artanddesign/gallery/2021/nov/24/childhood-resilience-stories-and-dreams-steve-mccurry-in-pictures
974
975
976
977
978
979
980
981
982
983
984
985
986
987
988
989
990
991
992
993
994
995
996
997
998
